# Supplementary material for: Acceptorless dehydrogenation and dehydrogenative coupling of alcohols catalysed by protic NHC ruthenium complexes
Source: Royal Society of Chemistry journal article supplement (doi:10.1039/c7ob00542c), 2017-01-01

Supporting Information  
for  
**Acceptorless Dehydrogenation and Dehydrogenative Coupling of Alcohols  
by Protic NHC Ruthenium Complexes**

Weihong Chang,<sup>a</sup> Xue Gong,<sup>a,b</sup> Shuizhong Wang,<sup>a</sup> Ling-Ping Xiao<sup>a</sup> and Guoyong Song<sup>a\*</sup>

<sup>a</sup> Beijing Key Laboratory of Lignocellulosic Chemistry, Beijing Forestry University, No.35  
Tsinghua East Road, Beijing 100083, China.

<sup>b</sup> School of Science, Beijing Forestry University, Beijing 100083, China

Contents

|   |                                                    |     |
|---|----------------------------------------------------|-----|
| 1 | General Information                                | S2  |
| 2 | Catalytic reactions                                | S2  |
| 3 | X-ray structures and data of <b>2</b> and <b>4</b> | S9  |
| 4 | NMR spectra                                        | S13 |

## 1. General Information

All reactions dealing with air- or moisture-sensitive compounds were performed by standard Schlenk techniques or in the nitrogen-filled Vigor glove box. Analytical thin-layer chromatography (TLC) was performed on HSGF254 silica gel plates. THF, xylene, toluene, diethyl ether and hexane were distilled from sodium and stored over fresh Na chips in a glovebox.  $^1\text{H}$  and  $^{13}\text{C}$  nuclear magnetic resonance (NMR) spectra of organic products were recorded on a Bruker AVIII 400 MHz spectrometer instrument. Data are reported as follows: chemical shift in ppm ( $\delta$ ), multiplicity (s = singlet, d = doublet, t = triplet, q = quartet, m = multiplet, br = broad signal), coupling constant (Hz), and integration.

## 2. Catalytic reactions

**General procedure for acceptorless dehydrogenation of alcohols:** In a nitrogen-filled glovebox, 1-phenylethanol (120 mg, 0.98 mmol), complex **2** (5.5 mg, 1% mol),  $\text{Cs}_2\text{CO}_3$  (3.2 mg, 1% mol) and xylene (1 mL) were charged in a seal bottle, which was heated at 140 °C. The reaction was monitored by GC-MS. After reaction, the solution was allowed to cool to room temperature, filtered through a silica gel column, and eluted with petroleum ether. The resulted solution was evaporated carefully under vacuum to afford acetophenone (100 mg, 85% yield). The  $^1\text{H}$  NMR and MS spectra of acetophenone were matched with the previous reports.

**General procedure for dehydrogenative coupling of secondary alcohols with primary alcohols:** In a nitrogen-filled glovebox, 1-phenylethanol (60 mg, 0.49 mmol), benzyl alcohol (55 mg, 0.51 mmol), complex **2** (5.5 mg, 2% mol),  $\text{Cs}_2\text{CO}_3$  (3.2 mg, 2% mol) and xylene (1 mL) were charged in a seal bottle, which was heated at 150 °C for 48 h. After reaction, the solution was allowed to cool to room temperature. The pure product **8a** was obtained as a white solid (87 mg, 85% yield) by column chromatography with petroleum ether/ethyl acetate (100:1) as eluent.

**Table S1** Optimization of dehydrogenative coupling of 1-phenylethanol and benzyl alcohol

| Entry | Cat. (2 mol%) | Solution | Temp (°C) | Base                            | GC Yield (%) |
|-------|---------------|----------|-----------|---------------------------------|--------------|
| 1     | 4             | toluene  | 120       | Cs <sub>2</sub> CO <sub>3</sub> | 43           |
| 2     | 4             | xylene   | 150       | Cs <sub>2</sub> CO <sub>3</sub> | 90           |
| 3     | 4             | xylene   | 120       | Cs <sub>2</sub> CO <sub>3</sub> | 38           |
| 4     | 4             | xylene   | 150       | none                            | 0            |
| 5     | 2             | xylene   | 150       | none                            | 0            |
| 6     | 2             | xylene   | 150       | Cs <sub>2</sub> CO <sub>3</sub> | 89           |
| 7     | 2             | xylene   | 150       | KO <sup>t</sup> Bu              | 3            |
| 8     | 2             | xylene   | 150       | NaO <sup>t</sup> Bu             | 24           |
| 9     | 2             | xylene   | 150       | NaOAc                           | 0            |

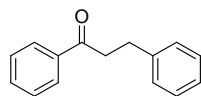

**1, 3-diphenylpropan-1-one (8a)**, White solid (85%). <sup>1</sup>H NMR (400 MHz, CDCl<sub>3</sub>):

δ 7.97 (d, *J* = 7.2 Hz, 2H), 7.56 (t, *J* = 7.4 Hz, 1H), 7.46 (t, *J* = 7.6 Hz, 2H), 7.25 – 7.34 (m, 4H), 7.22 (t, *J* = 7 Hz, 1H), 3.32 (t, *J* = 7.6 Hz, 2H), 3.09 (t, *J* = 7.8 Hz, 2H);

<sup>13</sup>C NMR (100 MHz, CDCl<sub>3</sub>): δ 199.2, 141.3, 136.9, 133.1, 128.6, 128.6, 128.5, 128.1, 126.2, 40.5, 30.2.

Data are consistent with previously reported data. [D. W. Wang, K. Y. Zhao, C. Y. Xu, H. Y. Miao, Y. Q. Ding, *ACS Catal.* **2014**, *4*, 3910-3918]

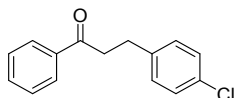

**3-(4-chlorophenyl)-1-phenylpropan-1-one (8b)**, pale yellow solid (71%). <sup>1</sup>H

NMR (400 MHz, CDCl<sub>3</sub>): δ 7.96 – 7.94 (m, 2H), 7.56 (t, *J* = 7.4 Hz, 1H), 7.46 (t, *J* = 7.6 Hz, 2H), 7.27 (s, 1H), 7.25 (s, 1H), 7.20 – 7.17 (m, 2H), 3.28 (t, *J* = 7.6

Hz, 2H), 3.05 (t, *J* = 7.6 Hz, 2H); <sup>13</sup>C NMR (100 MHz, CDCl<sub>3</sub>): δ 198.9, 139.7, 136.8, 133.2, 131.9, 129.8, 128.6 (2C), 128.0, 40.1, 29.4. Data are consistent with previously reported data. [D. W. Wang, K. Y. Zhao,

C. Y. Xu, H. Y. Miao, Y. Q. Ding, *ACS Catal.* **2014**, *4*, 3910-3918]

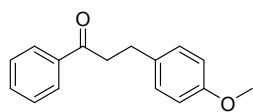

**3-(4-methoxyphenyl)-1-phenylpropan-1-one (8c)**, colorless oil (95%).  $^1\text{H}$  NMR (400 MHz,  $\text{CDCl}_3$ ):  $\delta$  7.96 (d,  $J = 7.2$ , 2H), 7.56 (t,  $J = 7.2$  Hz, 1H), 7.45 (t,  $J = 7.4$  Hz, 2H), 7.17 (d,  $J = 8.4$  Hz, 2H), 6.84 (d,  $J = 8.8$  Hz, 2H), 3.79 (s, 3H), 3.27 (t,  $J = 7.6$  Hz, 2H), 3.02 (t,  $J = 7.8$  Hz, 2H);  $^{13}\text{C}$  NMR (100 MHz,  $\text{CDCl}_3$ ):  $\delta$  199.4, 158.0, 136.9, 133.3, 133.1, 129.4, 128.6, 128.1, 114.0, 55.3, 40.7, 29.3. Data are consistent with previously reported data. [D. W. Wang, K. Y. Zhao, C. Y. Xu, H. Y. Miao, Y. Q. Ding, *ACS Catal.* **2014**, *4*, 3910-3918]

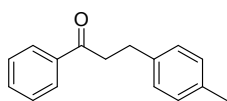

**1-phenyl-3-(p-tolyl)propan-1-one (8d)**, yellow oil (75%).  $^1\text{H}$  NMR (400 MHz,  $\text{CDCl}_3$ ):  $\delta$  7.97 (d,  $J = 7.2$  Hz, 2H), 7.56 (t,  $J = 7.4$  Hz, 1H), 7.46 (t,  $J = 7.6$  Hz, 2H), 7.16 (d,  $J = 8.4$ , 2H), 7.12 (d,  $J = 8.2$ , 2H), 3.29 (t,  $J = 7.8$  Hz, 2H), 3.04 (t,  $J = 7.6$  Hz, 2H), 2.33 (s, 3H);  $^{13}\text{C}$  NMR (100 MHz,  $\text{CDCl}_3$ ):  $\delta$  199.4, 138.2, 136.9, 135.6, 133.1, 129.2, 128.6, 128.3, 128.1, 40.6, 29.7, 21.0. Data are consistent with previously reported data. [S. Musa, L. Ackermann, D. Gelman, *Adv. Synth. Catal.* **2013**, *355*, 3077-3080]

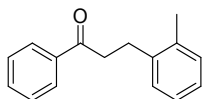

**1-phenyl-3-(o-tolyl)propan-1-one (8e)**, white solid (74%).  $^1\text{H}$  NMR (400 MHz,  $\text{CDCl}_3$ ):  $\delta$  7.98 (d,  $J = 7.2$  Hz, 2H), 7.57 (t,  $J = 7.4$  Hz, 1H), 7.47 (t,  $J = 7.6$  Hz, 2H), 7.12 – 7.22 (m, 4H), 3.26 (t,  $J = 8$  Hz, 2H), 3.06 (t,  $J = 7.8$  Hz, 2H), 2.36 (s, 3H);  $^{13}\text{C}$  NMR (100 MHz,  $\text{CDCl}_3$ ):  $\delta$  199.4, 139.4, 136.9, 136.0, 133.1, 130.4, 128.7, 128.6, 128.1, 126.3, 126.2, 39.1, 27.5, 19.4. Data are consistent with previously reported data. [X. Liu, R. S. Ding, L. He, Y. M. Liu, Y. Cao, H. Y. He, K. N. Fan, *ChemSusChem*, **2013**, *6*, 604-608]

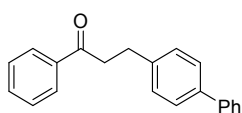

**3-([1,1'-biphenyl]-4-yl)-1-phenylpropan-1-one (8f)**, yellow solid (58%);  $^1\text{H}$  NMR (400 MHz,  $\text{CDCl}_3$ ):  $\delta$  8.00 (d,  $J = 7.2$  Hz, 2H), 7.52 – 7.61 (m, 5H), 7.40 – 7.50 (m, 4H), 7.32 – 7.36 (m, 3H), 3.36 (t,  $J = 7.2$  Hz, 2H), 3.13 (t,  $J = 7.6$  Hz, 2H);  $^{13}\text{C}$  NMR (100 MHz,  $\text{CDCl}_3$ ):  $\delta$  199.2, 141.0, 140.4, 139.2, 136.9, 133.1, 128.9, 128.8, 128.6, 128.1, 127.3, 127.1, 127.0, 40.4, 29.8. Data are consistent with previously reported data. [T. Kuwahara, T. Fukuyama, I.

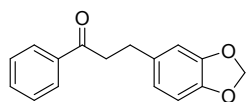

**3-(benzo[d][1,3]dioxol-5-yl)-1-phenylpropan-1-one (8g)**, colorless oil (58%).

**<sup>1</sup>H NMR** (400 MHz, CDCl<sub>3</sub>): δ 7.95 (d, *J* = 8.4 Hz, 2H), 7.56 (t, *J* = 6.8, 1H), 7.46 (t, *J* = 6.8 Hz, 2H), 6.67 – 6.75 (m, 3H), 5.92 (d, *J* = 1.2 Hz, 2H), 3.26 (t, *J* = 8.4 Hz, 2H), 3.00 (t, *J* = 7.6 Hz, 2H); **<sup>13</sup>C NMR** (100 MHz, CDCl<sub>3</sub>): δ 199.2, 147.7, 145.9, 136.9, 135.1, 133.1, 128.6, 128.0, 121.2, 108.9, 108.3, 100.8, 40.7, 29.9. Data are consistent with previously reported data. [X. J. Cui, Y. Zhang, F. Shi, Y. Q. Deng, *Chem. Eur. J.* **2011**, *17*, 1021-1028]

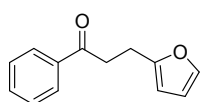

**3-(furan-2-yl)-1-phenylpropan-1-one (8h)**, yellow oil (94%). **<sup>1</sup>H NMR** (400 MHz,

CDCl<sub>3</sub>): δ 7.98 (d, *J* = 7.2 Hz, 2H), 7.57 (t, *J* = 7.4 Hz, 1H), 7.47 (t, *J* = 7.6 Hz, 2H), 7.32 (d, *J* = 0.8 Hz, 1H), 6.29 (dd, *J* = 2.9, 2.0 Hz, 1H), 6.06 (d, *J* = 2.4 Hz, 1H), 3.34 (t, *J* = 7.6 Hz, 2H), 3.10 (t, *J* = 7.4 Hz, 2H); **<sup>13</sup>C NMR** (100 MHz, CDCl<sub>3</sub>): δ 198.7, 154.8, 141.1, 136.8, 133.1, 128.6, 128.0, 110.3, 105.3, 36.9, 22.5. Data are consistent with previously reported data. [D. W. Wang, K. Y. Zhao, C. Y. Xu, H. Y. Miao, Y. Q. Ding, *ACS Catal.* **2014**, *4*, 3910-3918]

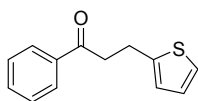

**1-phenyl-3-(thiophen-2-yl)propan-1-one (8i)**, yellow oil (75%). **<sup>1</sup>H NMR** (400 MHz,

CDCl<sub>3</sub>): δ 7.97 (d, *J* = 7.6 Hz, 2H), 7.57 (t, *J* = 7.2 Hz, 1H), 7.47 (t, *J* = 7.6 Hz, 2H), 7.13 (dd, *J* = 1.2, 2.6, 1H), 6.90 – 6.94 (m, 1H), 6.87 (d, *J* = 2.8 Hz, 1H), 3.35 – 3.40 (m, 2H), 3.20 – 3.33 (m, 2H); **<sup>13</sup>C NMR** (100 MHz, CDCl<sub>3</sub>): δ 198.6, 143.9, 136.8, 133.2, 128.7, 128.1, 126.9, 124.7, 123.4, 40.6, 24.2. Data are consistent with previously reported data. [T. Kuwahara, T. Fukuyama, I. Ryu, *Org. Lett.* **2012**, *14*, 4703-4705]

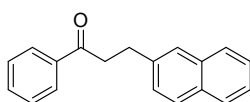

**3-(naphthalen-2-yl)-1-phenylpropan-1-one (8j)**, white solid (86%); **<sup>1</sup>H NMR**

(400 MHz, CDCl<sub>3</sub>): δ 7.99 (d, *J* = 7.2 Hz, 2H), 7.79 – 7.82 (m, 3H), 7.70 (s, 1H),

7.56 (t,  $J = 7.2$  Hz, 1H), 7.38 – 7.50 (m, 5H), 3.40 (t,  $J = 7.6$  Hz, 2H), 3.25 (t,  $J = 7.6$  Hz, 2H);  $^{13}\text{C}$  NMR (100 MHz,  $\text{CDCl}_3$ ):  $\delta$  199.2, 138.8, 136.9, 133.7, 133.1, 132.1, 128.6, 128.14, 128.07, 127.6, 127.5, 127.2, 126.5, 126.0, 125.3, 40.4, 30.3. Data are consistent with previously reported data. [B. Q. Ding, Z. F. Zhang, Y. G. Liu, M. Sugiya, T. Imamoto, W. Zhang, *Org. Lett.* **2013**, *14*, 3690-3693]

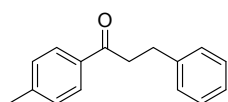

**1-phenyl-1-(*p*-tolyl)propan-1-one (8k)**, white solid (76%);  $^1\text{H}$  NMR (400 MHz,  $\text{CDCl}_3$ ):  $\delta$  7.87 (d,  $J = 8.4$  Hz, 2H), 7.19 – 7.34 (m, 7H), 3.29 (t,  $J = 7.6$  Hz, 2H), 3.07 (t,  $J = 7.8$  Hz, 2H), 2.42 (s, 3H);  $^{13}\text{C}$  NMR (100 MHz,  $\text{CDCl}_3$ ):  $\delta$  199.0, 144.0,

141.5, 134.5, 129.4, 128.6, 128.5, 128.3, 126.2, 40.5, 30.4, 21.8. Data are consistent with previously reported data. [X. Liu, R. S. Ding, L. He, Y. M. Liu, Y. Cao, H. Y. He, K. N. Fan, *ChemSusChem*, **2013**, *6*, 604-608]

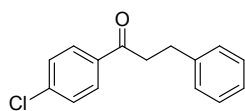

**1-(4-chlorophenyl)-3-phenylpropan-1-one (8l)**, yellow solid (68%).  $^1\text{H}$  NMR (400 MHz,  $\text{CDCl}_3$ ):  $\delta$  7.89 (d,  $J = 8.4$  Hz, 2H), 7.43 (d,  $J = 8.4$  Hz, 2H), 7.20 – 7.31(m, 5H), 3.27 (t,  $J = 7.8$  Hz, 2H), 3.07 (t,  $J = 7.8$  Hz, 2H);  $^{13}\text{C}$  NMR (100

MHz,  $\text{CDCl}_3$ ):  $\delta$  198.0, 141.1, 139.2, 135.2, 129.5, 128.9, 128.6, 128.4, 128.2, 40.4, 30.1. Data are consistent with previously reported data. [D. W. Wang, K. Y. Zhao, C. Y. Xu, H. Y. Miao, Y. Q. Ding, *ACS Catal.* **2014**, *4*, 3910-3918]

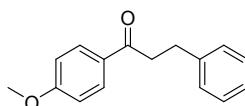

**1-(4-methoxyphenyl)-3-phenylpropan-1-one (8m)**, white solid (90%).  $^1\text{H}$  NMR (400 MHz,  $\text{CDCl}_3$ ):  $\delta$  7.95 (d,  $J = 8$  Hz, 2H), 7.19-7.33 (m, 5H), 6.93 (d,  $J = 8.4$  Hz, 2H), 3.87 (s, 3H), 3.26 (t,  $J = 7.8$  Hz, 2H), 3.06 (t,  $J = 7.6$  Hz, 2H);  $^{13}\text{C}$  NMR (100

MHz,  $\text{CDCl}_3$ ):  $\delta$  197.8, 163.5, 141.5, 130.3, 130.0, 128.5, 128.4, 126.1, 113.7, 55.5, 40.1, 30.4. Data are consistent with previously reported data. [X. Liu, R. S. Ding, L. He, Y. M. Liu, Y. Cao, H. Y. He, K. N. Fan, *ChemSusChem*, **2013**, *6*, 604-608]

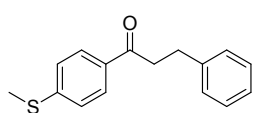

**1-(4-(methylthio)phenyl)-3-phenylpropan-1-one (8n)**, white solid (92%). <sup>1</sup>H

**NMR** (400 MHz, CDCl<sub>3</sub>): δ 7.87 (d, *J* = 8.4 Hz, 2H), 7.20 – 7.33 (m, 7H), 3.26 (t, *J* = 7.8 Hz, 2H), 3.06 (t, *J* = 7.8 Hz, 2H), 2.52 (s, 3H); <sup>13</sup>C **NMR** (100 MHz,

CDCl<sub>3</sub>): δ 198.2, 145.8, 141.3, 133.2, 128.54, 128.47(2C), 126.2, 125.0, 40.3, 30.2, 14.8. Data are consistent with previously reported data. [F. Caturla, J.–M. Jiménez, N. Godessart, M. Amat, A. Cárdenas, L. Soca, J. Beleta, H. Ryder, M. Crespo, *J. Med. Chem.* **2004**, *47*, 3874-3886]

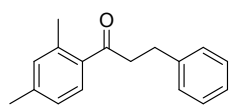

**1-(2,4-dimethylphenyl)-3-phenylpropan-1-one (8o)**, colorless oil (58%). <sup>1</sup>H

**NMR** (400 MHz, CDCl<sub>3</sub>): δ 7.56 (s, 1H), 7.16 – 7.32 (m, 5H), 7.03 – 7.06 (m, 2H),

3.22 (t, *J* = 7.8 Hz, 2H), 3.04 (t, *J* = 7.6 Hz, 2H), 2.48 (s, 3H), 2.35 (s, 3H); <sup>13</sup>C **NMR** (100 MHz, CDCl<sub>3</sub>): δ 202.6, 141.9, 141.4, 138.7, 134.9, 132.9, 129.0, 128.5, 128.4, 126.3, 126.1, 42.9, 30.5, 21.5, 21.3. Data are consistent with previously reported data. [Q. B. Jiang, T. L. Guo, Q. F. Wang, P. Wu, Z. K. Yu, *Adv. Synth. Catal.* **2013**, *355*, 1874-1880]

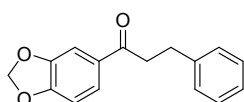

**1-(benzo[d][1,3]dioxol-5-yl)-3-phenylpropan-1-one (8p)**, white solid (87%). <sup>1</sup>H

**NMR** (400 MHz, CDCl<sub>3</sub>): δ 7.56 (dd, *J* = 8.2, 1.5 Hz, 1H), 7.45 (d, *J* = 1.6 Hz, 1H), 7.19 – 7.33 (m, 5H), 6.83 (d, *J* = 8 Hz, 1H), 6.03 (s, 2H), 3.22 (t, *J* = 7.6 Hz,

2H), 3.05 (t, *J* = 7.6 Hz, 2H); <sup>13</sup>C **NMR** (100 MHz, CDCl<sub>3</sub>): δ 197.3, 151.7, 148.2, 141.4, 131.8, 128.8, 128.5, 128.4, 126.1, 124.2, 107.9, 101.8, 40.2, 30.4. Data are consistent with previously reported data. [P. Colbon, J. Ruan, M. Purdie, J. L. Xiao, *Org. Lett.* **2010**, *12*, 3670-3673]

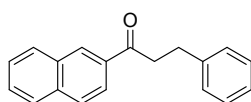

**1-(naphthalen-2-yl)-3-phenylpropan-1-one (8q)**, White solid (93%). <sup>1</sup>H **NMR**

(400 MHz, CDCl<sub>3</sub>): δ 8.47 (s, 1H), 8.05 (d, *J* = 8.4 Hz, 1H), 7.80 – 7.96 (m, 3H), 7.50 – 7.63 (m, 2H), 7.20 – 7.35 (m, 4H), 3.45 (t, *J* = 7.8 Hz, 2H), 3.14 (t, *J* = 7.8

Hz, 2H); <sup>13</sup>C **NMR** (100 MHz, CDCl<sub>3</sub>): δ 199.2, 141.4, 135.6, 134.2, 132.6, 129.7, 129.6, 128.6, 128.5 (3C), 127.8, 126.8, 126.2, 123.9, 40.6, 30.3. Data are consistent with previously reported data. [K.

Chakrabarti, B. Paul, M. Maji, B. C. Roy, S. Shee, S. Kundu, *Org. Biomol. Chem*, **2016**, 14, 10988-10997]

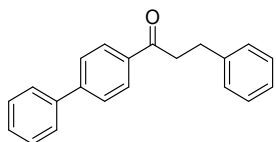

**1-([1,1'-biphenyl]-4-yl)-3-phenylpropan-1-one (8r)**, white solid (66%); **<sup>1</sup>H**

**NMR** (400 MHz, CDCl<sub>3</sub>): δ 8.05 (d, *J* = 8.4 Hz, 2H), 7.69 (d, *J* = 8.4 Hz, 2H), 7.64 (d, *J* = 7.6 Hz, 2H), 7.48 (t, *J* = 7.6 Hz, 2H), 7.42 (d, *J* = 7.2 Hz, 1H), 7.20 – 7.36 (m, 5H), 3.35 (t, *J* = 7.6 Hz, 2H), 3.12 (t, *J* = 7.8 Hz, 2H); **<sup>13</sup>C**

**NMR** (100 MHz, CDCl<sub>3</sub>): δ 198.8, 145.8, 141.4, 139.9, 135.6, 129.0, 128.7, 128.6, 128.5, 128.3, 127.3 (2C signals), 126.2, 40.5, 30.2. Data are consistent with previously reported data. [A. Zanardi, J A. Mata, E. Peris, *J. Am. Chem. Soc.* **2009**, 131, 14531-14537.]



### 3. X-ray structures and data of **2** and **4**

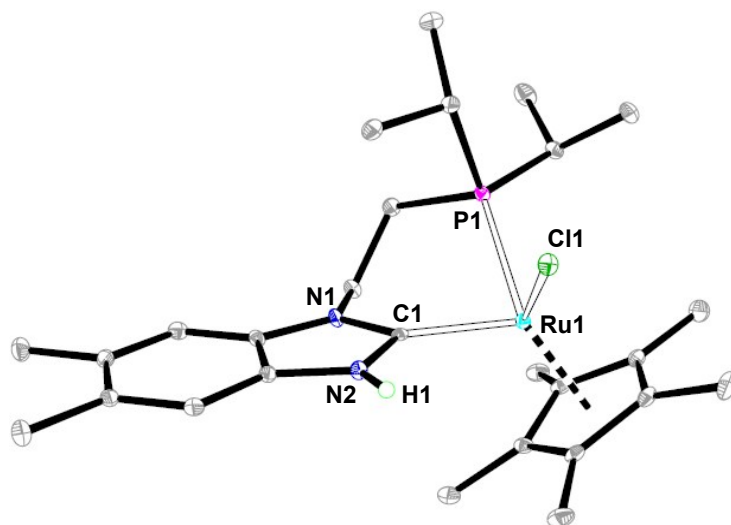

ORTEP of **2** with thermal ellipsoids at the 30% probability level. Hydrogen atoms have been omitted for clarity (CCDC No: 1529097).

**Table S2: Crystal data and structure refinement for 2**

|                                                                                         |                                                      |
|-----------------------------------------------------------------------------------------|------------------------------------------------------|
| Identification code                                                                     | <b>Complex 2</b>                                     |
| Empirical formula                                                                       | C <sub>27</sub> H <sub>42</sub> ClN <sub>2</sub> PRu |
| Formula weight                                                                          | 562.12                                               |
| Temperature / K                                                                         | 104.4                                                |
| Crystal system                                                                          | Monoclinic                                           |
| Space group                                                                             | P2 <sub>1</sub> /c                                   |
| a / Å, b / Å, c / Å                                                                     | 12.74606(16), 10.64439(15), 19.7255(3)               |
| $\alpha$ /°, $\beta$ /°, $\gamma$ /°                                                    | 90.00, 98.7804(13), 90.00                            |
| Volume / Å <sup>3</sup>                                                                 | 2644.88(6)                                           |
| Z                                                                                       | 4                                                    |
| $\rho_{\text{calc}}$ / mg mm <sup>-3</sup>                                              | 1.412                                                |
| $\mu$ / mm <sup>-1</sup>                                                                | 0.772                                                |
| F (ooo)                                                                                 | 1176                                                 |
| Crystal size / mm <sup>3</sup>                                                          | 0.25 × 0.24 × 0.09                                   |
| 2 $\theta$ range for data collection                                                    | 6.2 to 52°                                           |
| Index ranges                                                                            | -15 ≤ h ≤ 12, -12 ≤ k ≤ 13, -24 ≤ l ≤ 22             |
| Reflections collected                                                                   | 11464                                                |
| Independent reflections                                                                 | 5191 [R(int) = 0.0265 (inf-0.9Å)]                    |
| Data/restraints/parameters                                                              | 5191/0/300                                           |
| Goodness-of-fit on F <sup>2</sup>                                                       | 1.051                                                |
| Final R indexes [I > 2 $\sigma$ (I) i.e. F <sub>o</sub> > 4 $\sigma$ (F <sub>o</sub> )] | R <sub>1</sub> = 0.0285, wR <sub>2</sub> = 0.0598    |
| Final R indexes [all data]                                                              | R <sub>1</sub> = 0.0340, wR <sub>2</sub> = 0.0626    |
| Largest diff.peak/hole/ e Å <sup>-3</sup>                                               | 0.418/-0.488                                         |
| Flack Parameters                                                                        | N                                                    |
| Completeness                                                                            | 0.998                                                |

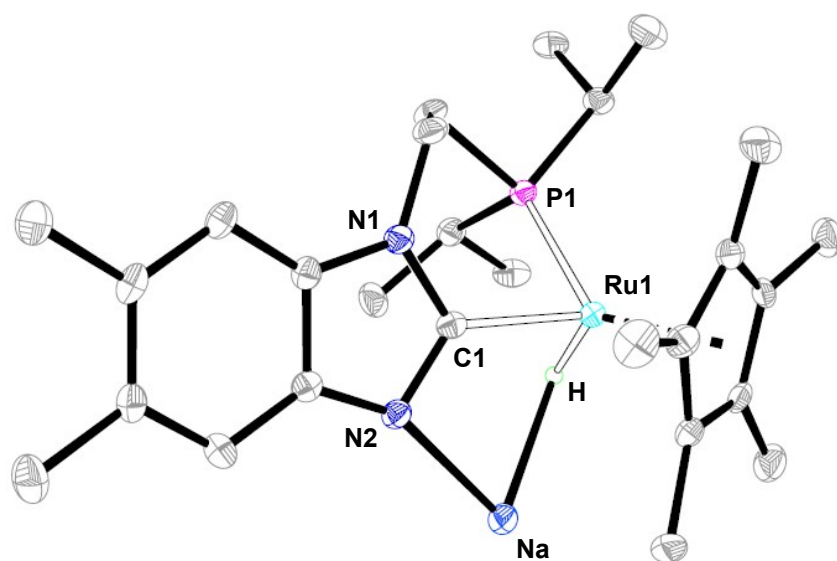

ORTEP of **3** with thermal ellipsoids at the 30% probability level. Hydrogen atoms and C<sub>6</sub>H<sub>6</sub> have been omitted for clarity (CCDC No: 1529098).

**Table S3: Crystal data and structure refinement for 3**

|                                           |                                                                                    |
|-------------------------------------------|------------------------------------------------------------------------------------|
| Identification code                       | <b>Complex 3·C<sub>6</sub>H<sub>6</sub></b>                                        |
| Empirical formula                         | C <sub>27</sub> H <sub>42</sub> N <sub>2</sub> NaPRu·C <sub>6</sub> H <sub>6</sub> |
| Formula weight                            | 627.76                                                                             |
| Temperature / K                           | 163(2)K                                                                            |
| Wavelength                                | 0.71073 Å                                                                          |
| Crystal system                            | Triclinic                                                                          |
| Space group                               | P-1                                                                                |
| a / Å, b / Å, c / Å                       | 10.123(3), 12.566(3), 13.275(4)                                                    |
| α/deg, β/deg, γ/deg                       | 83.199(5), 84.143(5), 68.651(4)                                                    |
| Volume / Å <sup>3</sup>                   | 1559.3(7)                                                                          |
| Z                                         | 2                                                                                  |
| ρ <sub>calc</sub> / mg m <sup>-3</sup>    | 1.337                                                                              |
| μ / mm <sup>-1</sup>                      | 0.59                                                                               |
| F (000)                                   | 660                                                                                |
| Crystal size / mm <sup>3</sup>            | 0.23 × 0.16 × 0.14                                                                 |
| 2θ range for data collection              | 1.6 to 28.31 deg                                                                   |
| Index ranges                              | -13 ≤ h ≤ 11, -16 ≤ k ≤ 16, -17 ≤ l ≤ 11                                           |
| Reflections collected                     | 10055                                                                              |
| Independent reflections                   | 6939[R(int) = 0.0404]                                                              |
| Absorption correction                     | None                                                                               |
| Max. and min. transmission                | 0.920 and 0.893                                                                    |
| Refinement method                         | Full-matrix least-squares on F <sup>2</sup>                                        |
| Data/restraints/parameters                | 6939/0/349                                                                         |
| Goodness-of-fit on F <sup>2</sup>         | 0.95                                                                               |
| Final R indexes [I>2σ(I)]                 | R <sub>1</sub> = 0.0538, wR <sub>2</sub> = 0.1268                                  |
| Final R indexes [all data]                | R <sub>1</sub> = 0.0747, wR <sub>2</sub> = 0.1377                                  |
| Largest diff.peak/hole/ e Å <sup>-3</sup> | 0.615/-0.65                                                                        |
| Completeness                              | 0.922                                                                              |

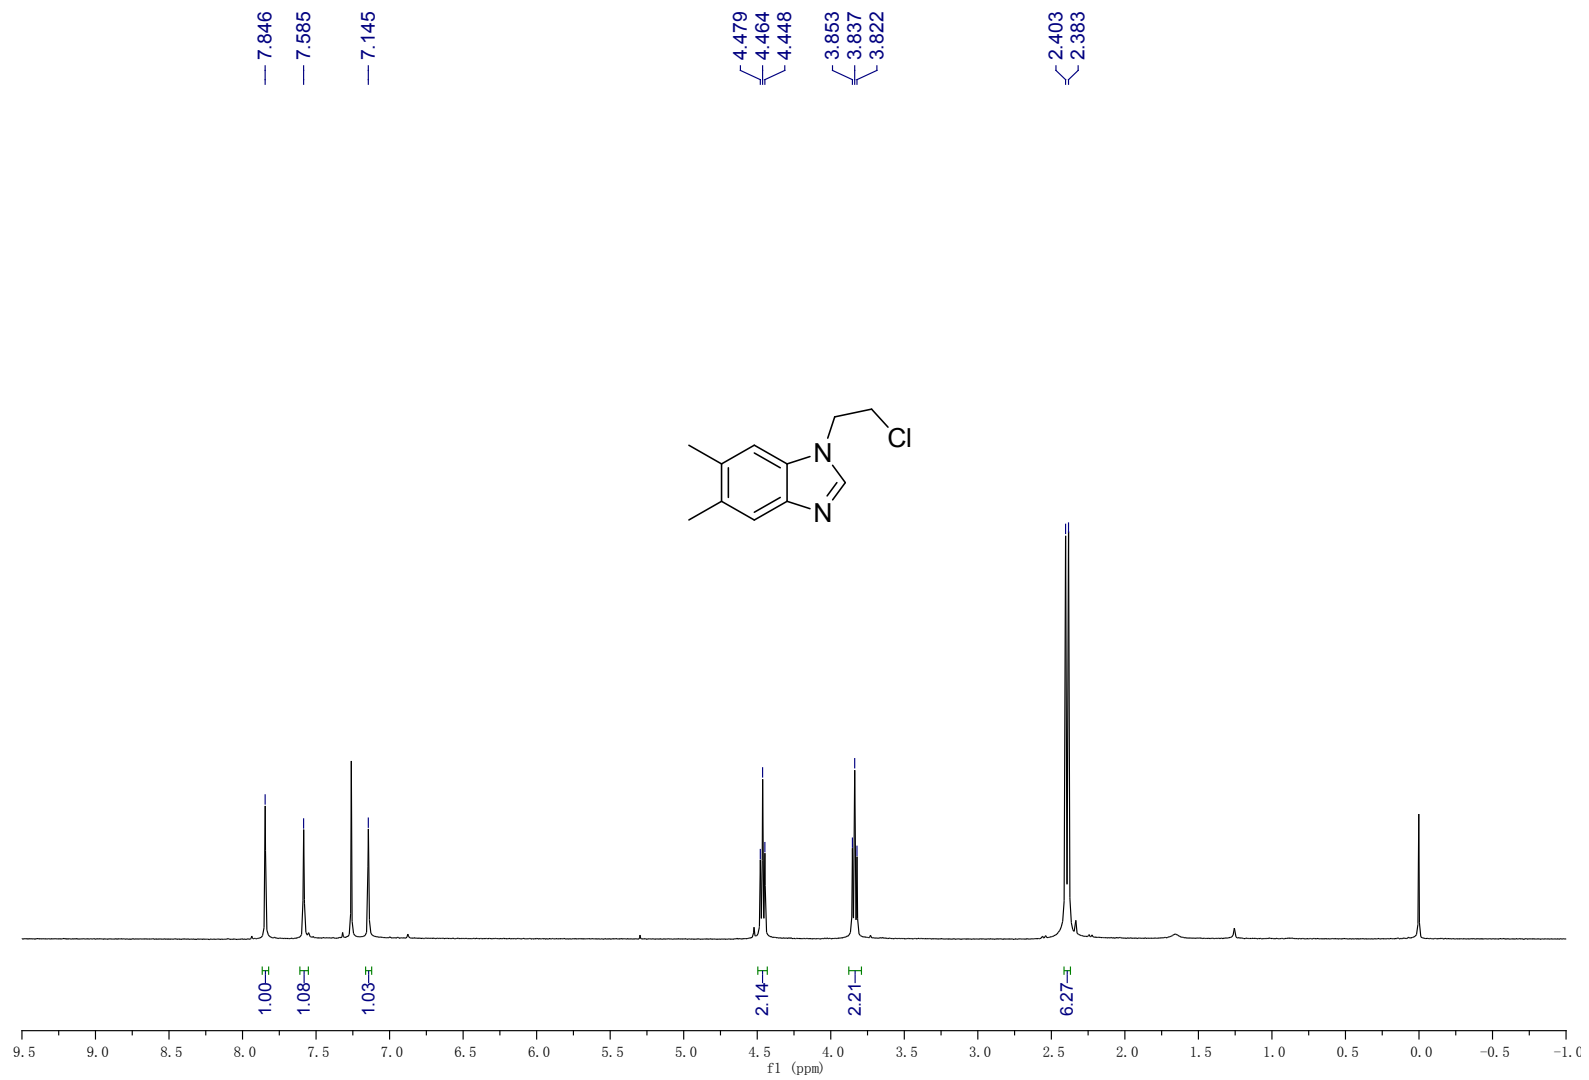

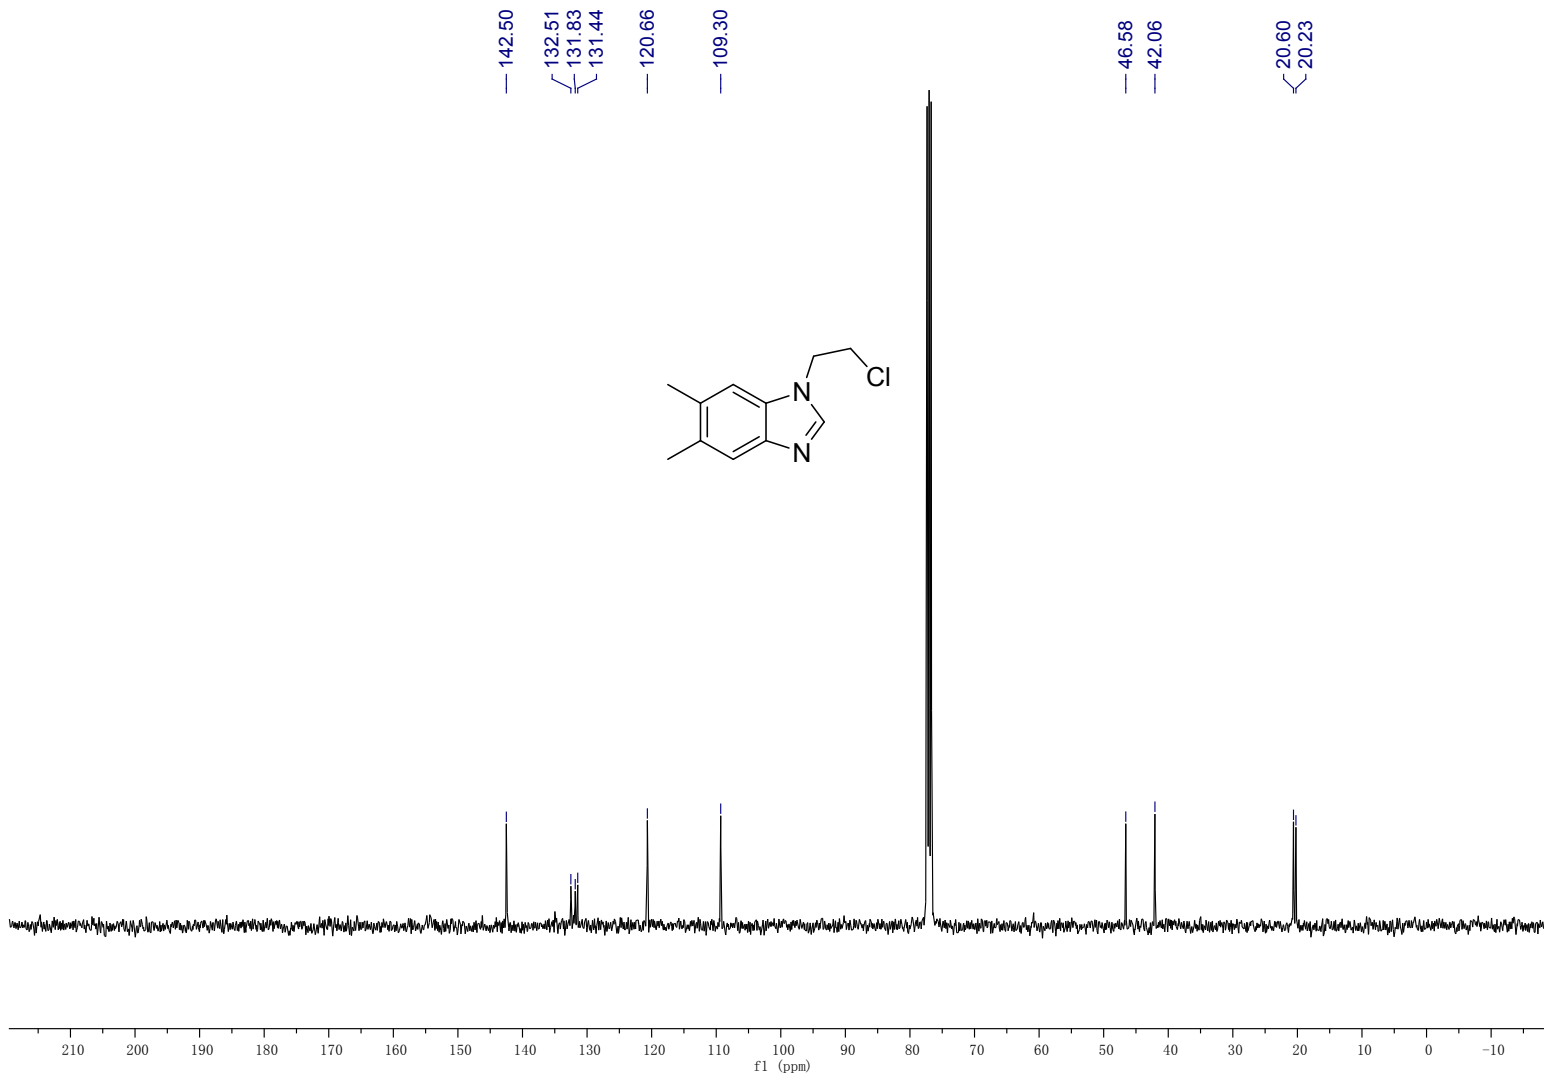

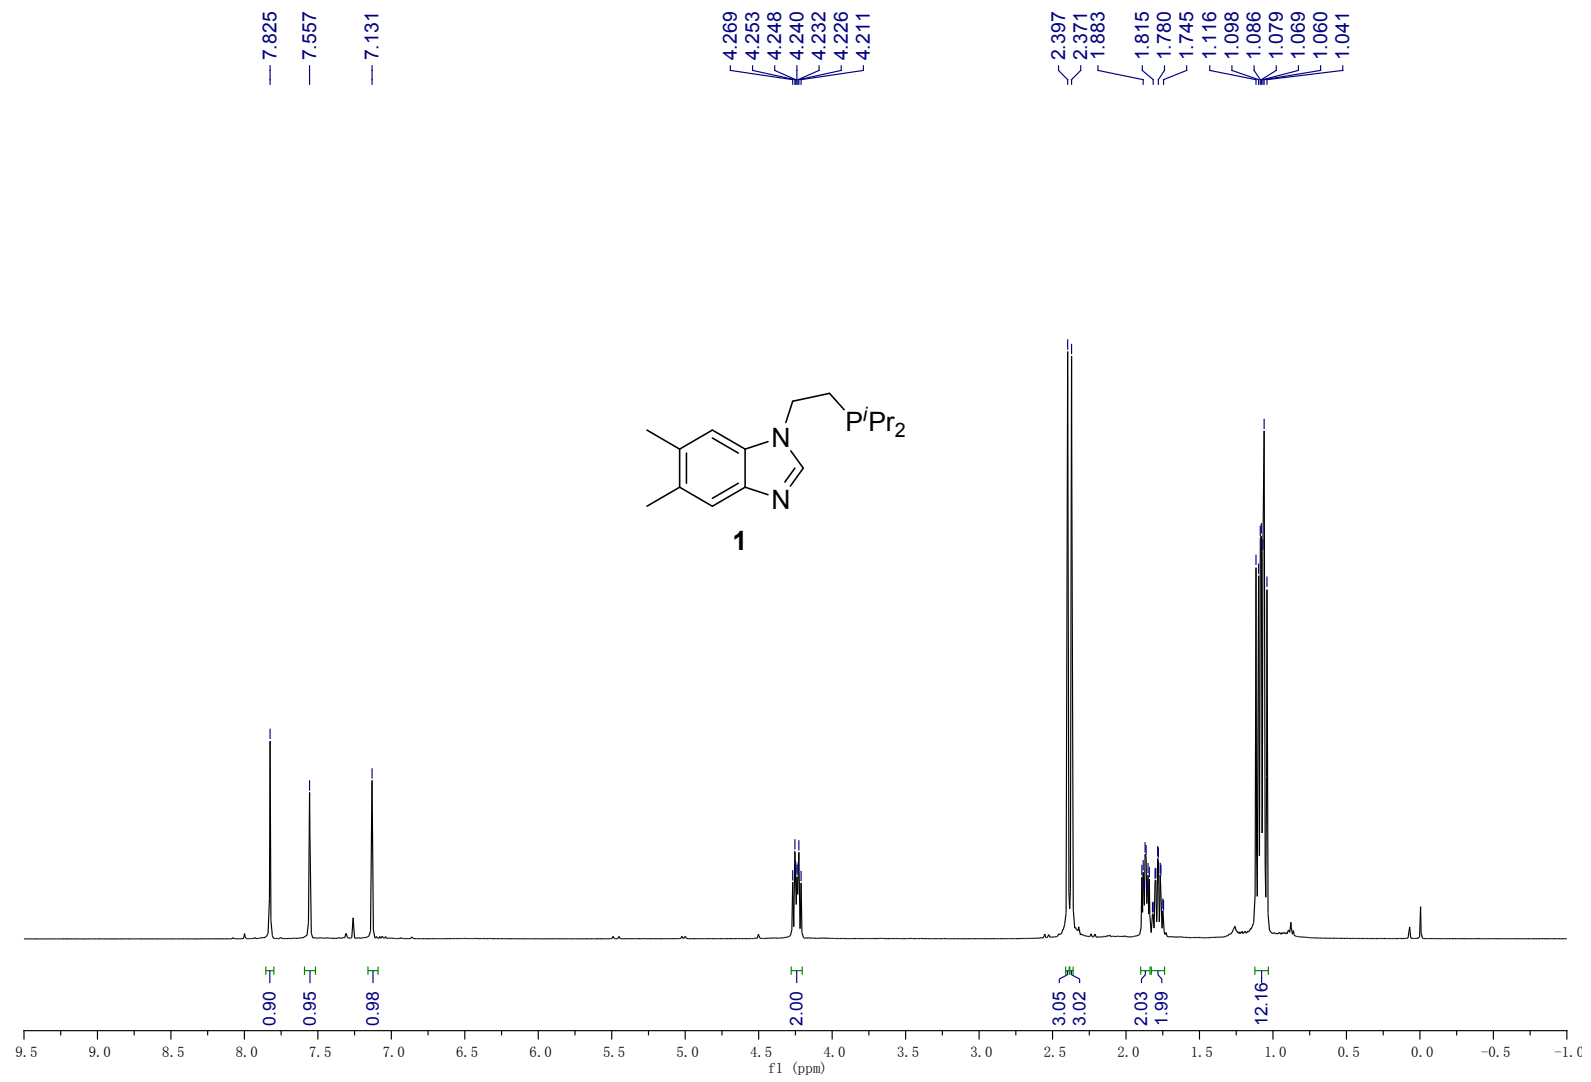

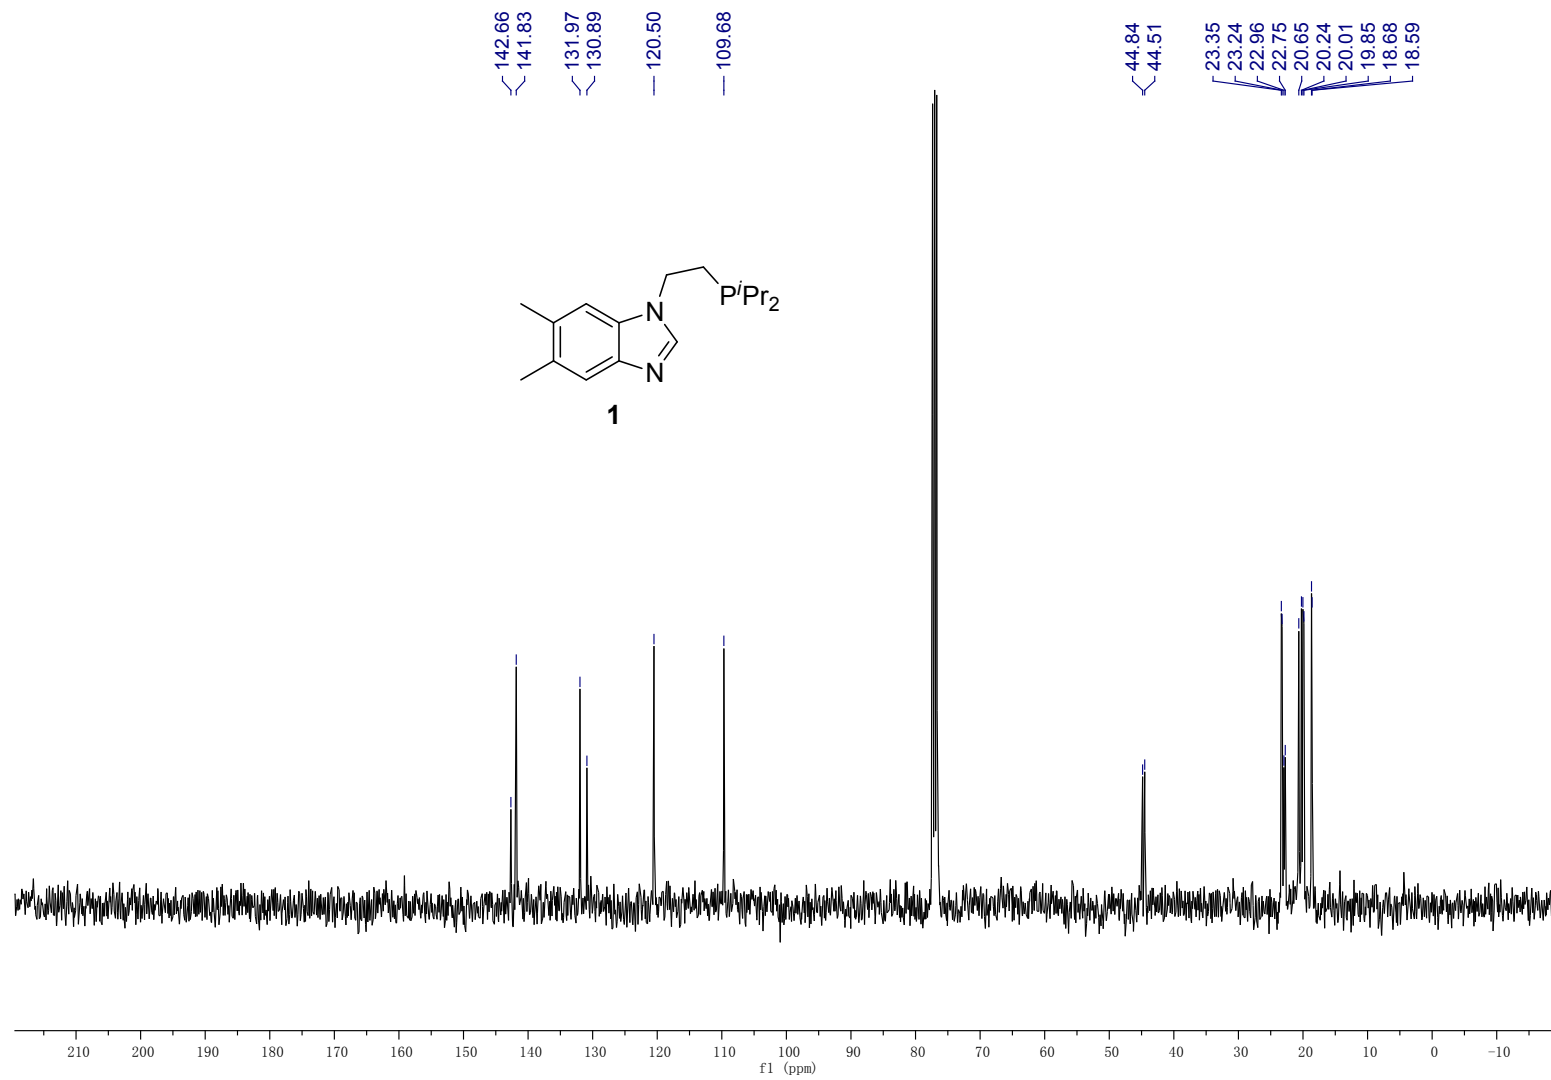



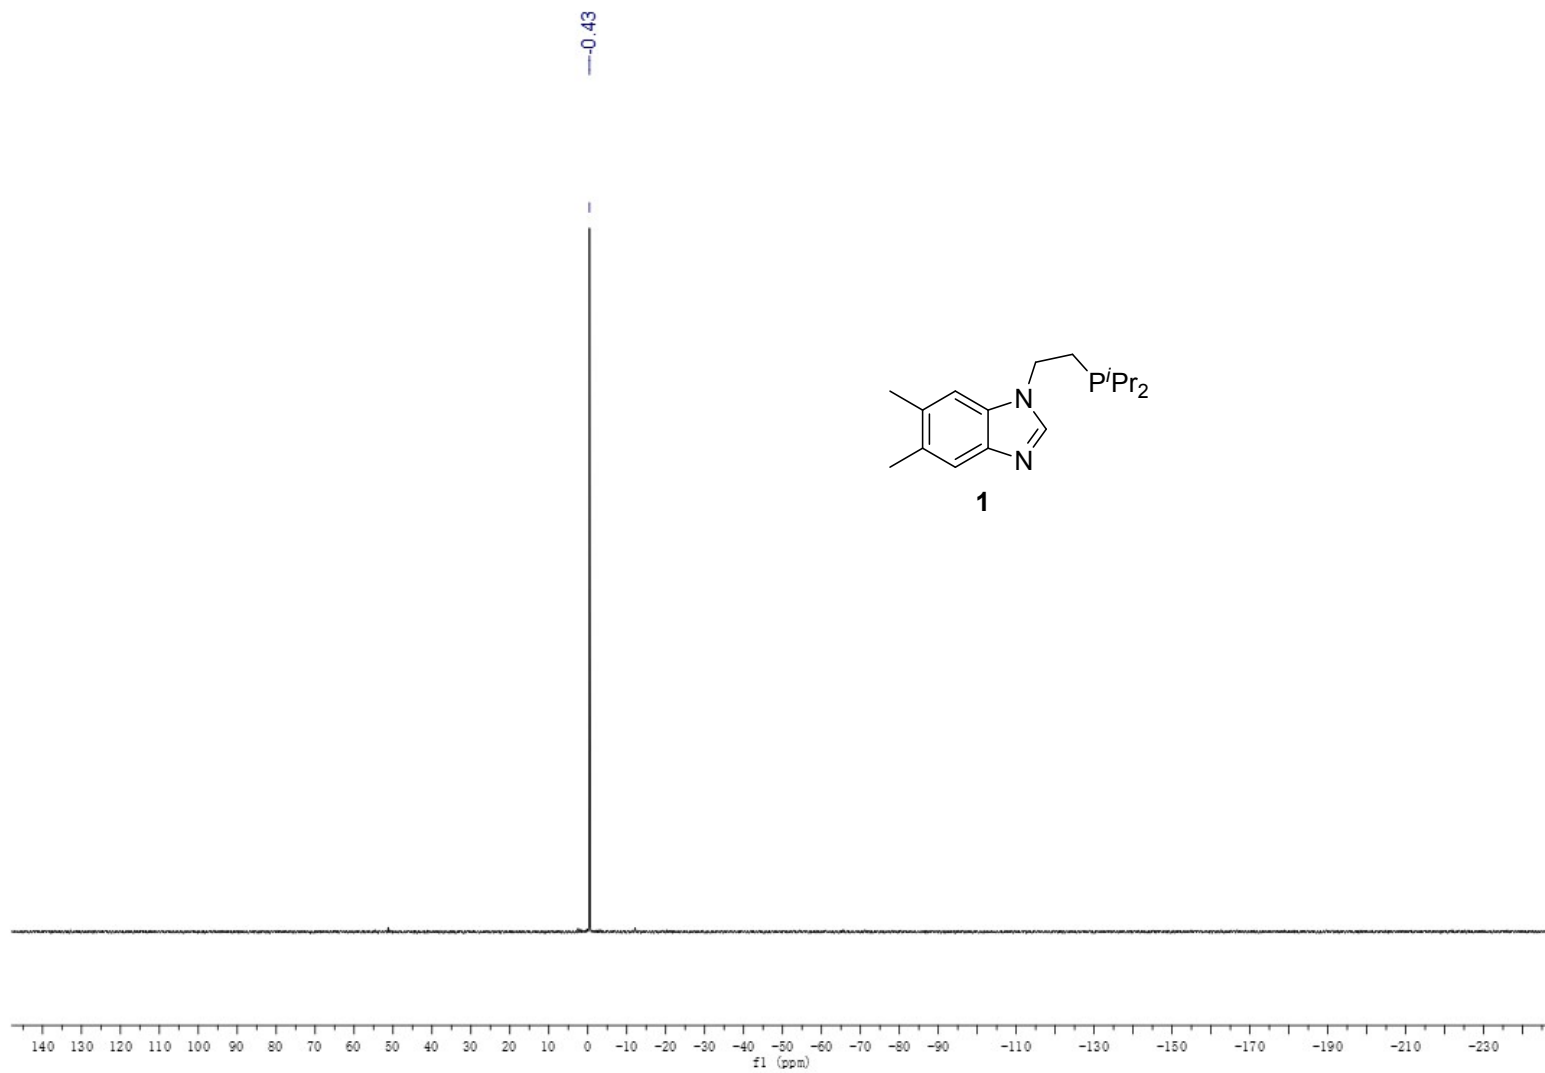

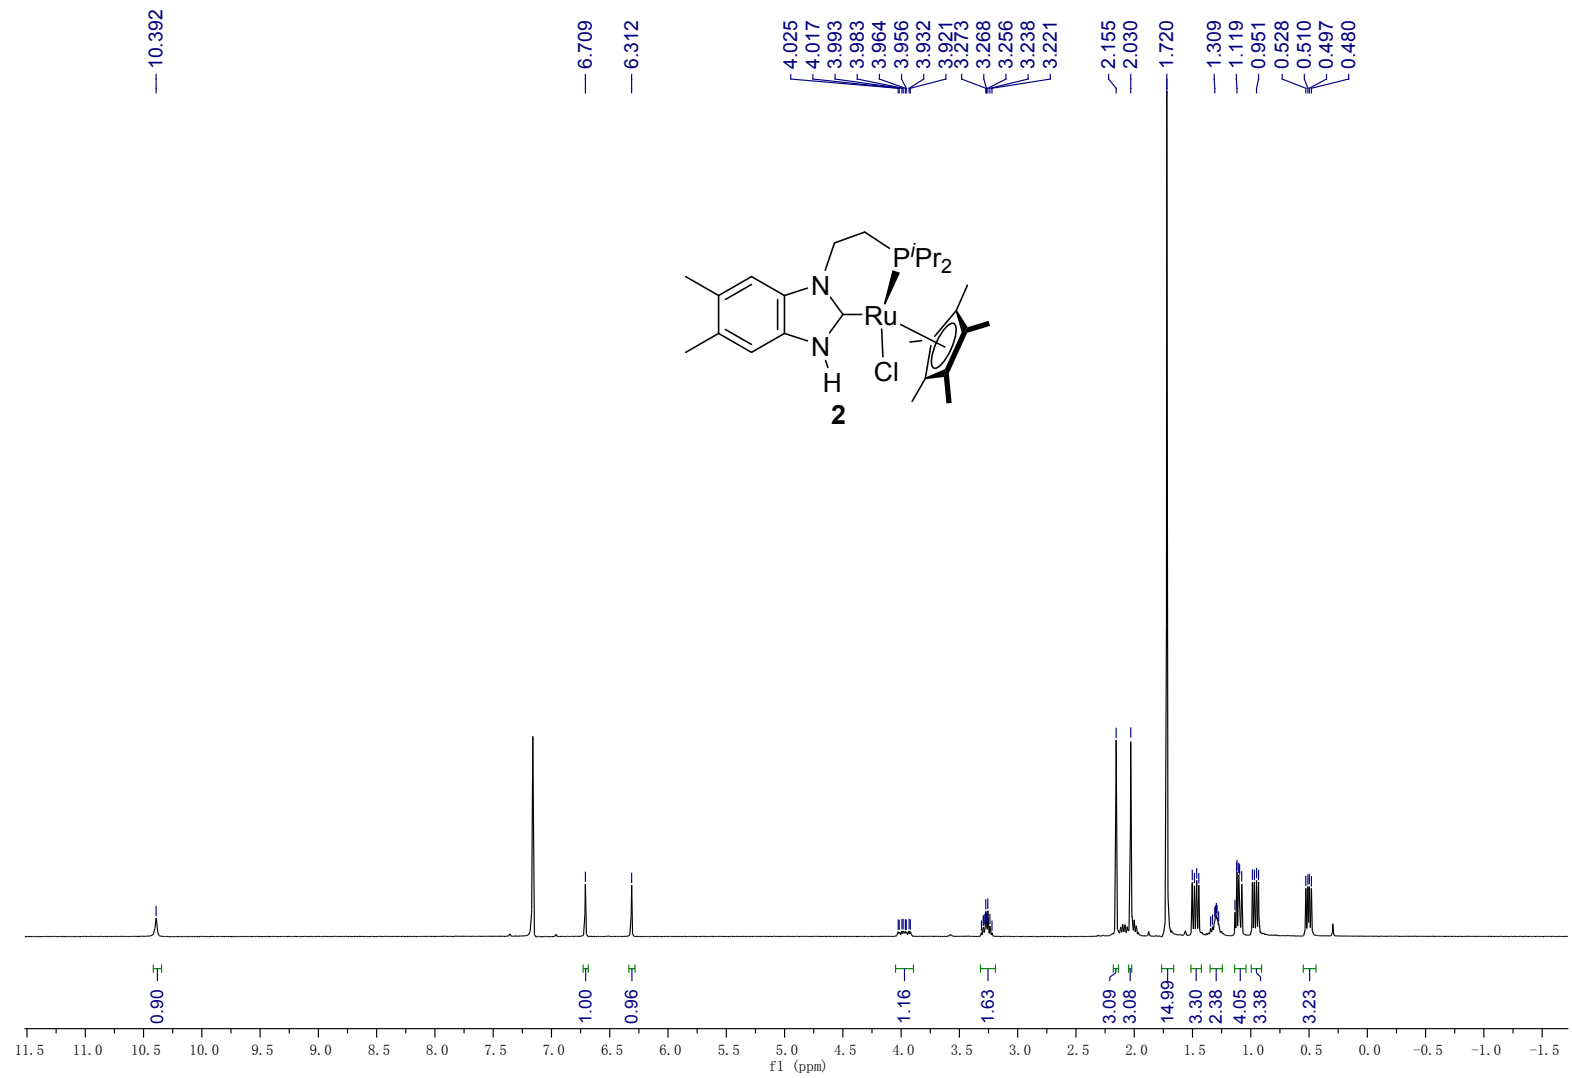

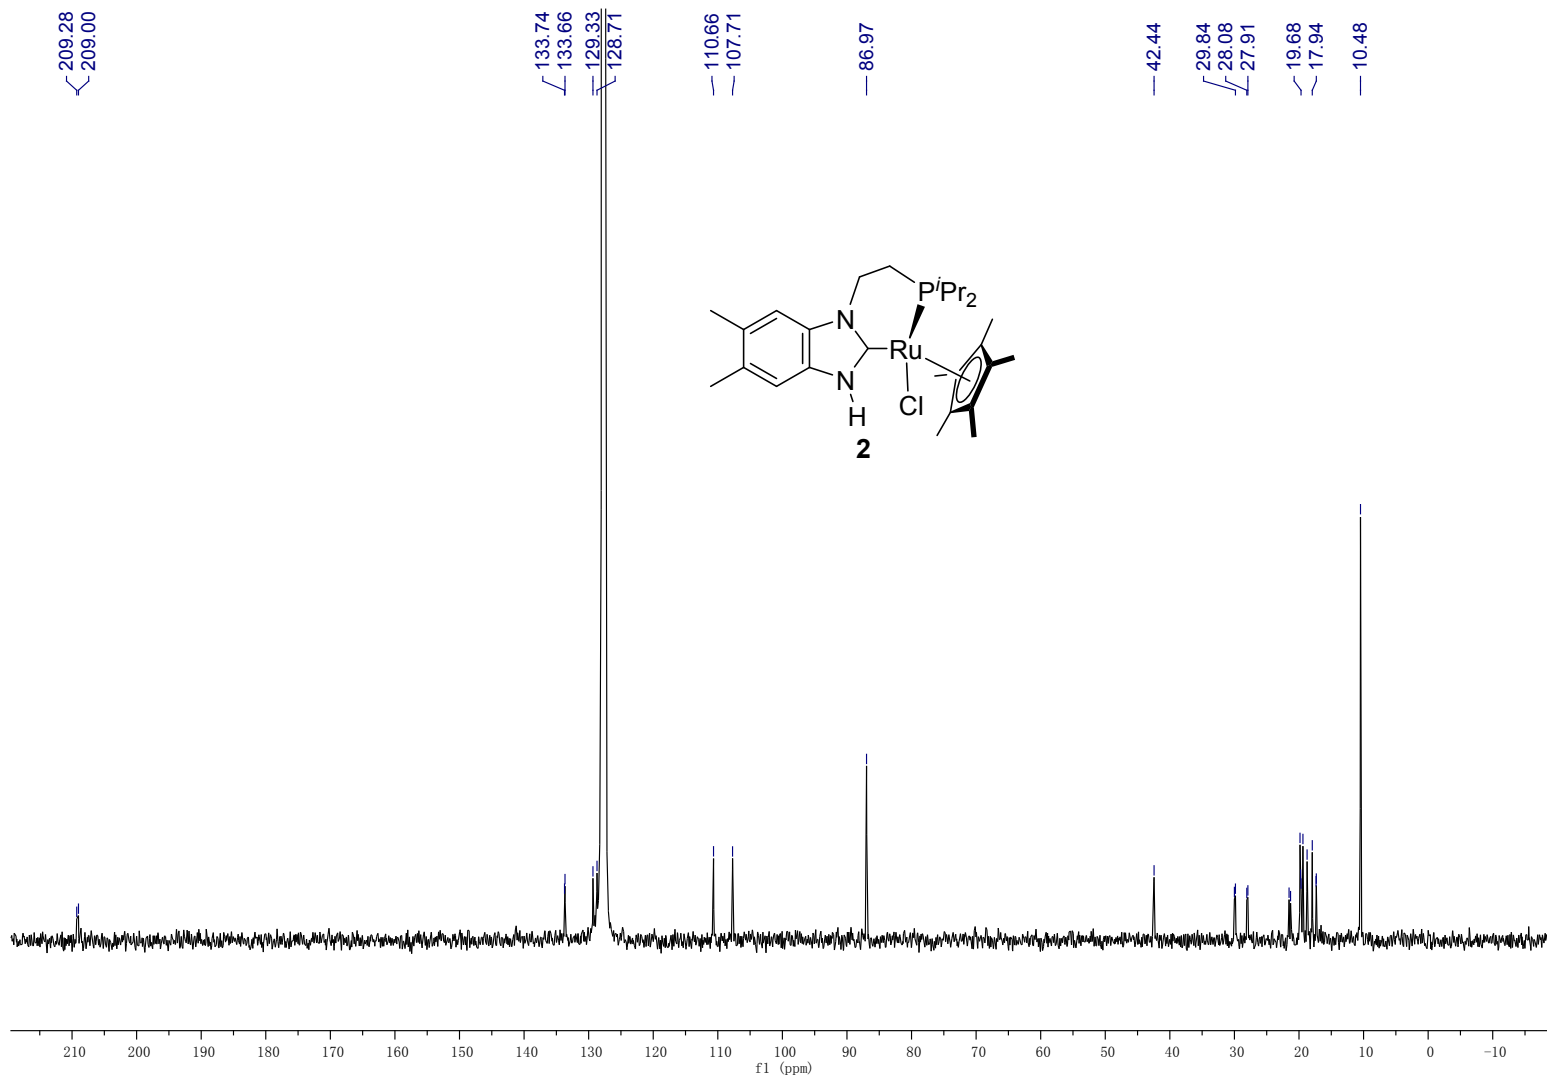

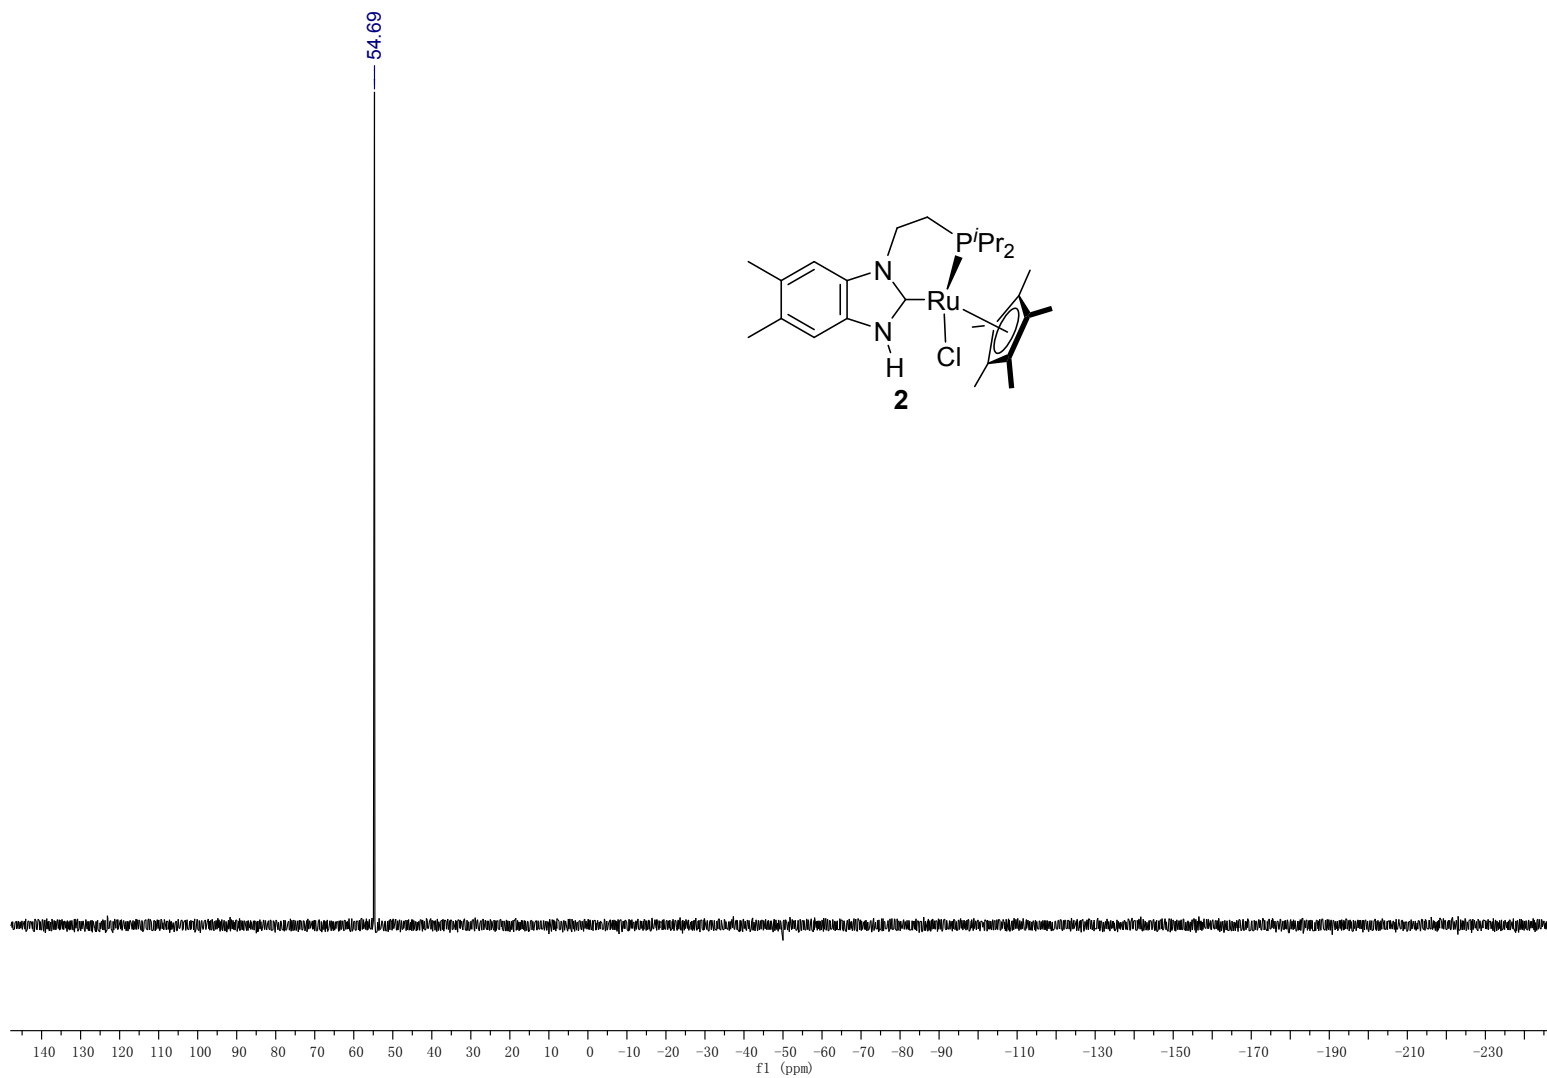

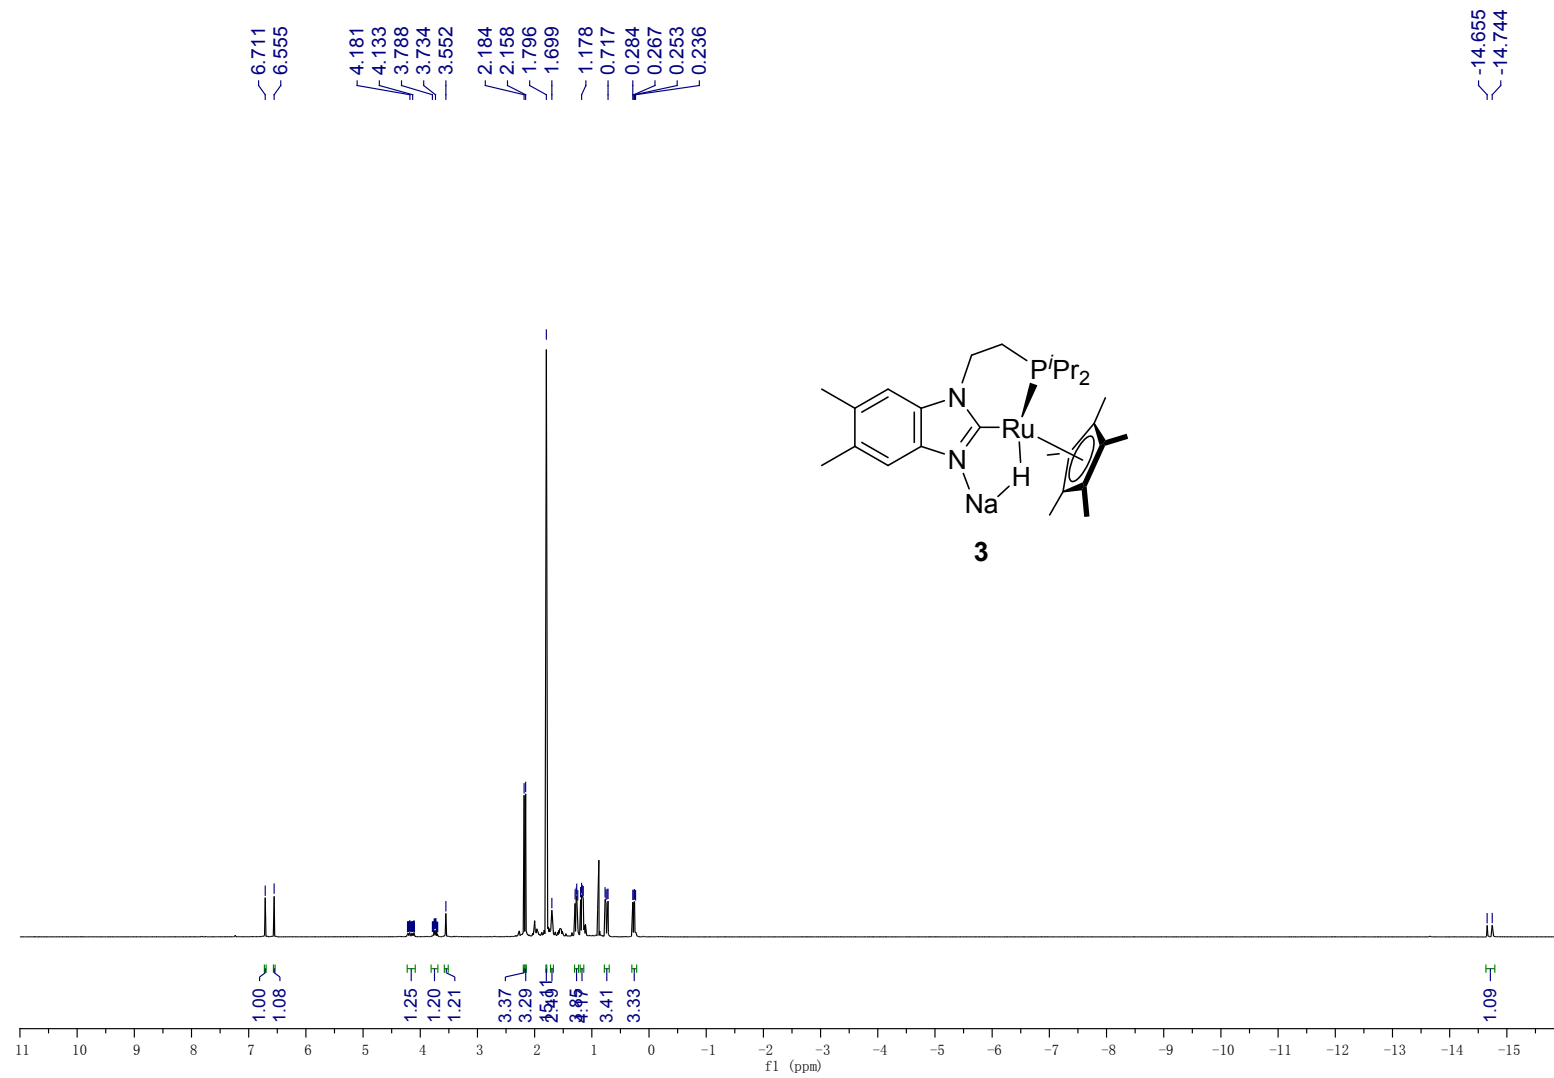

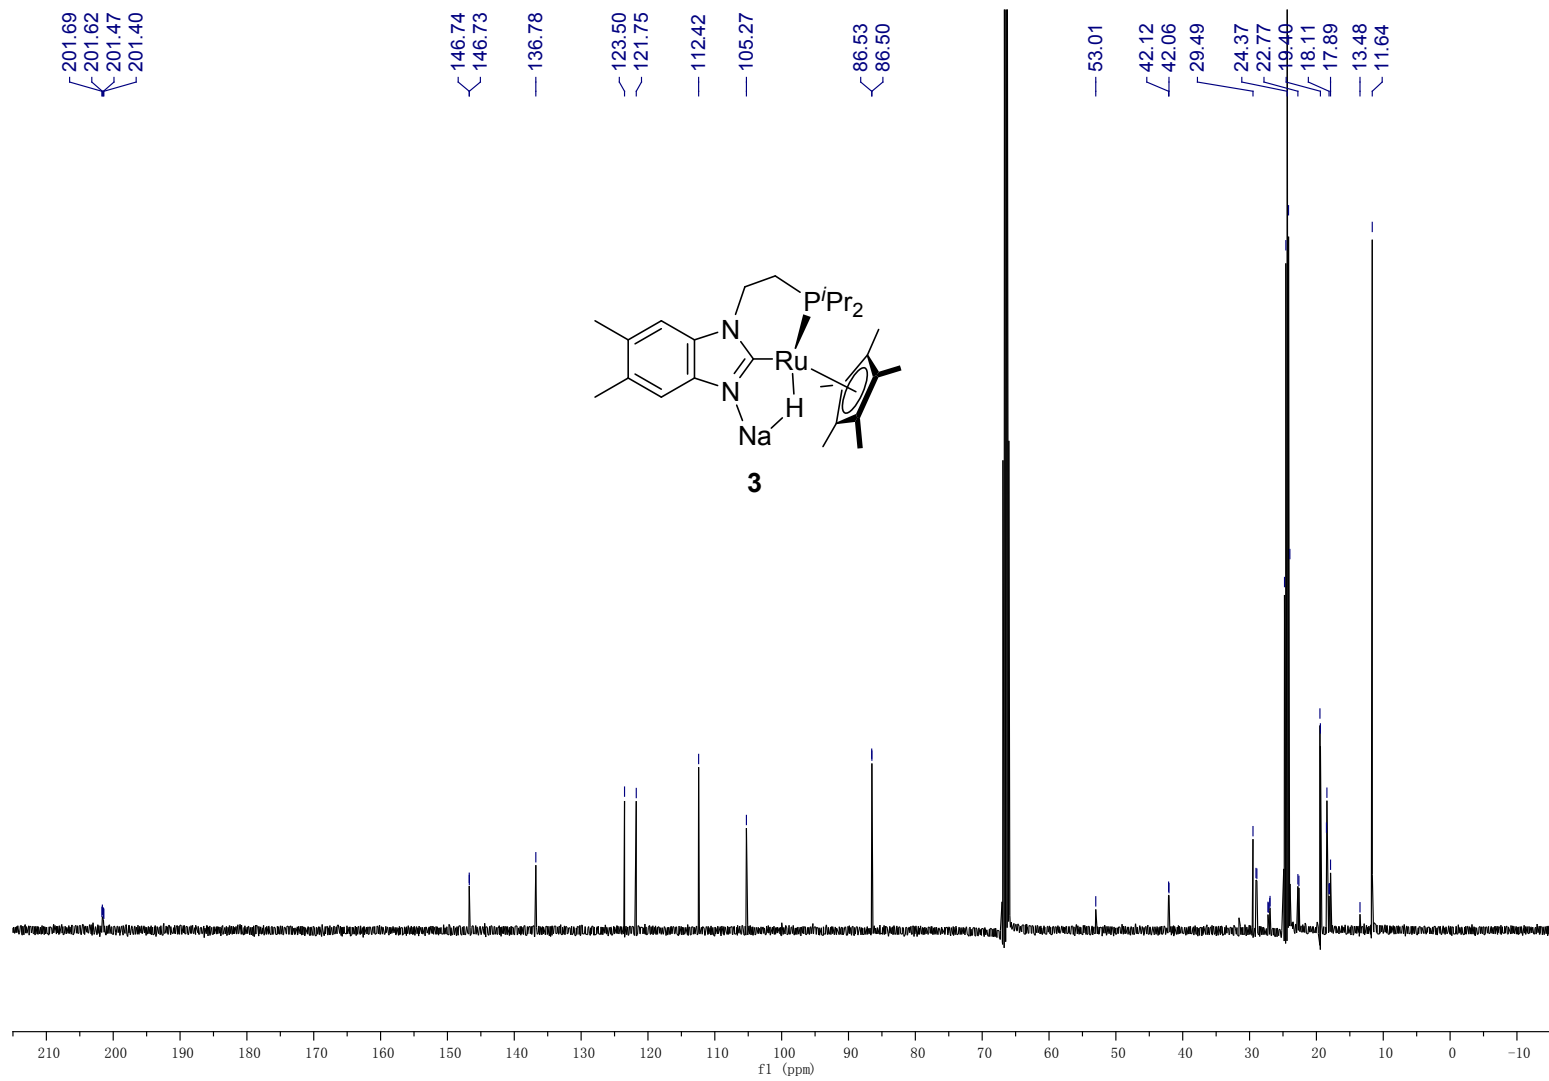

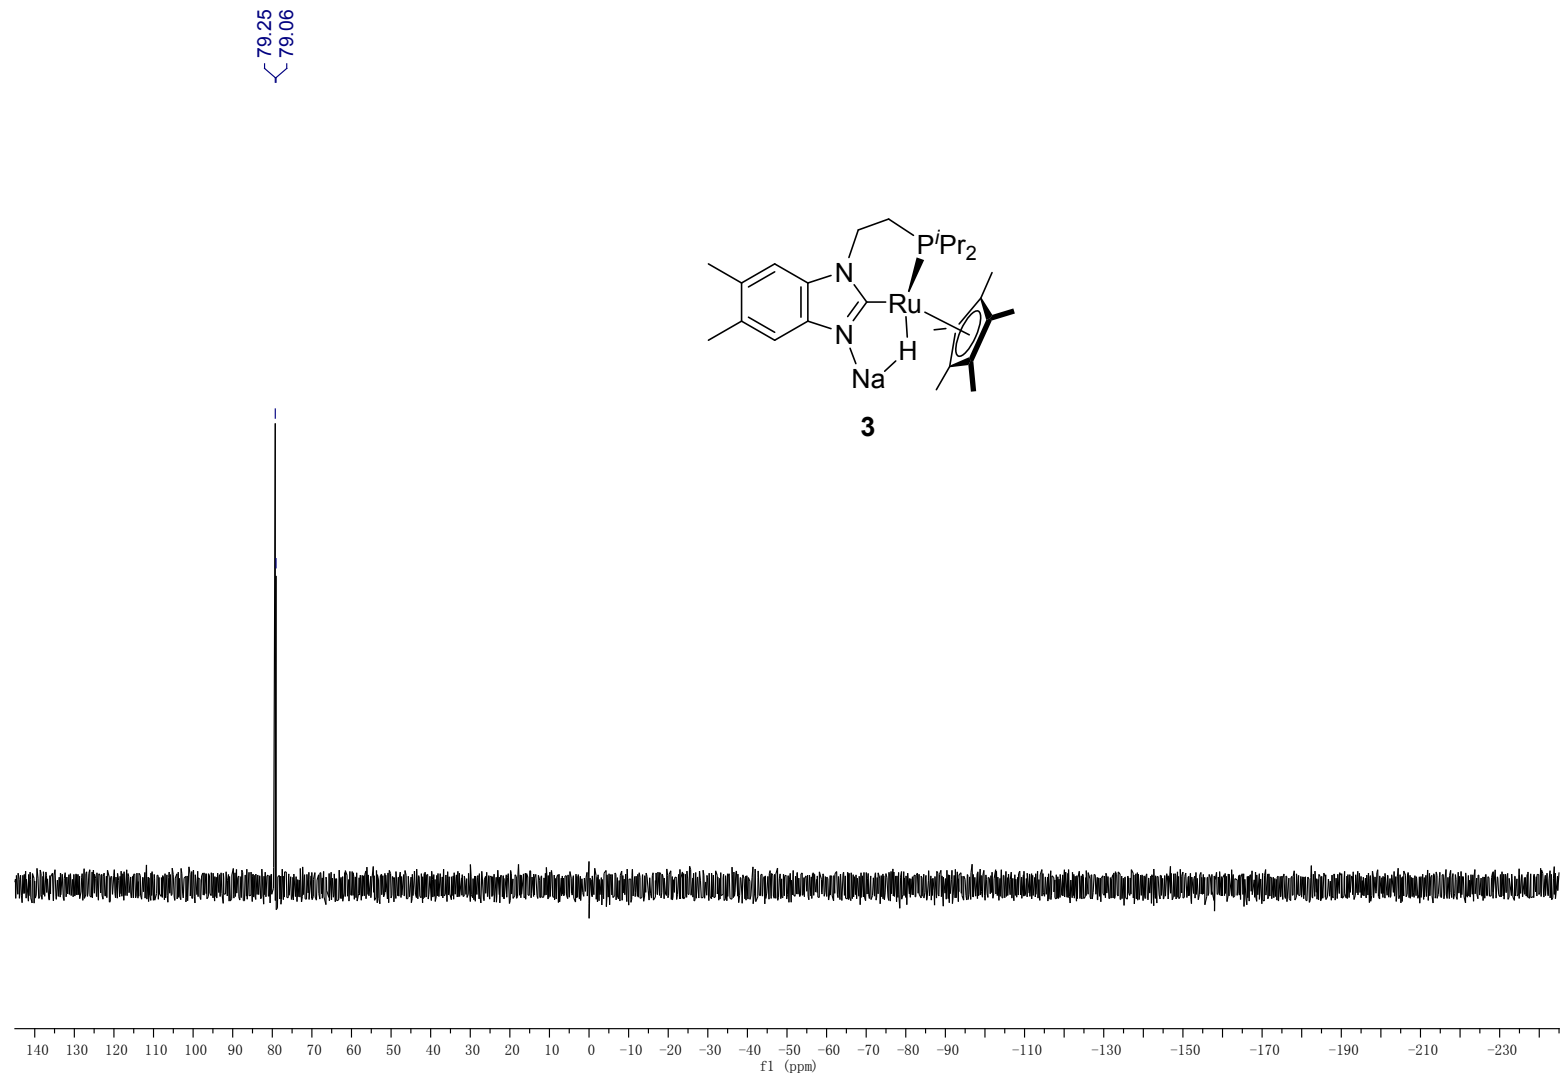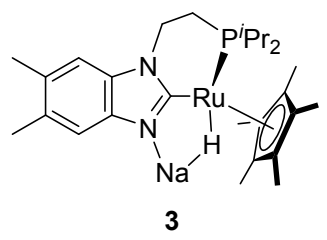

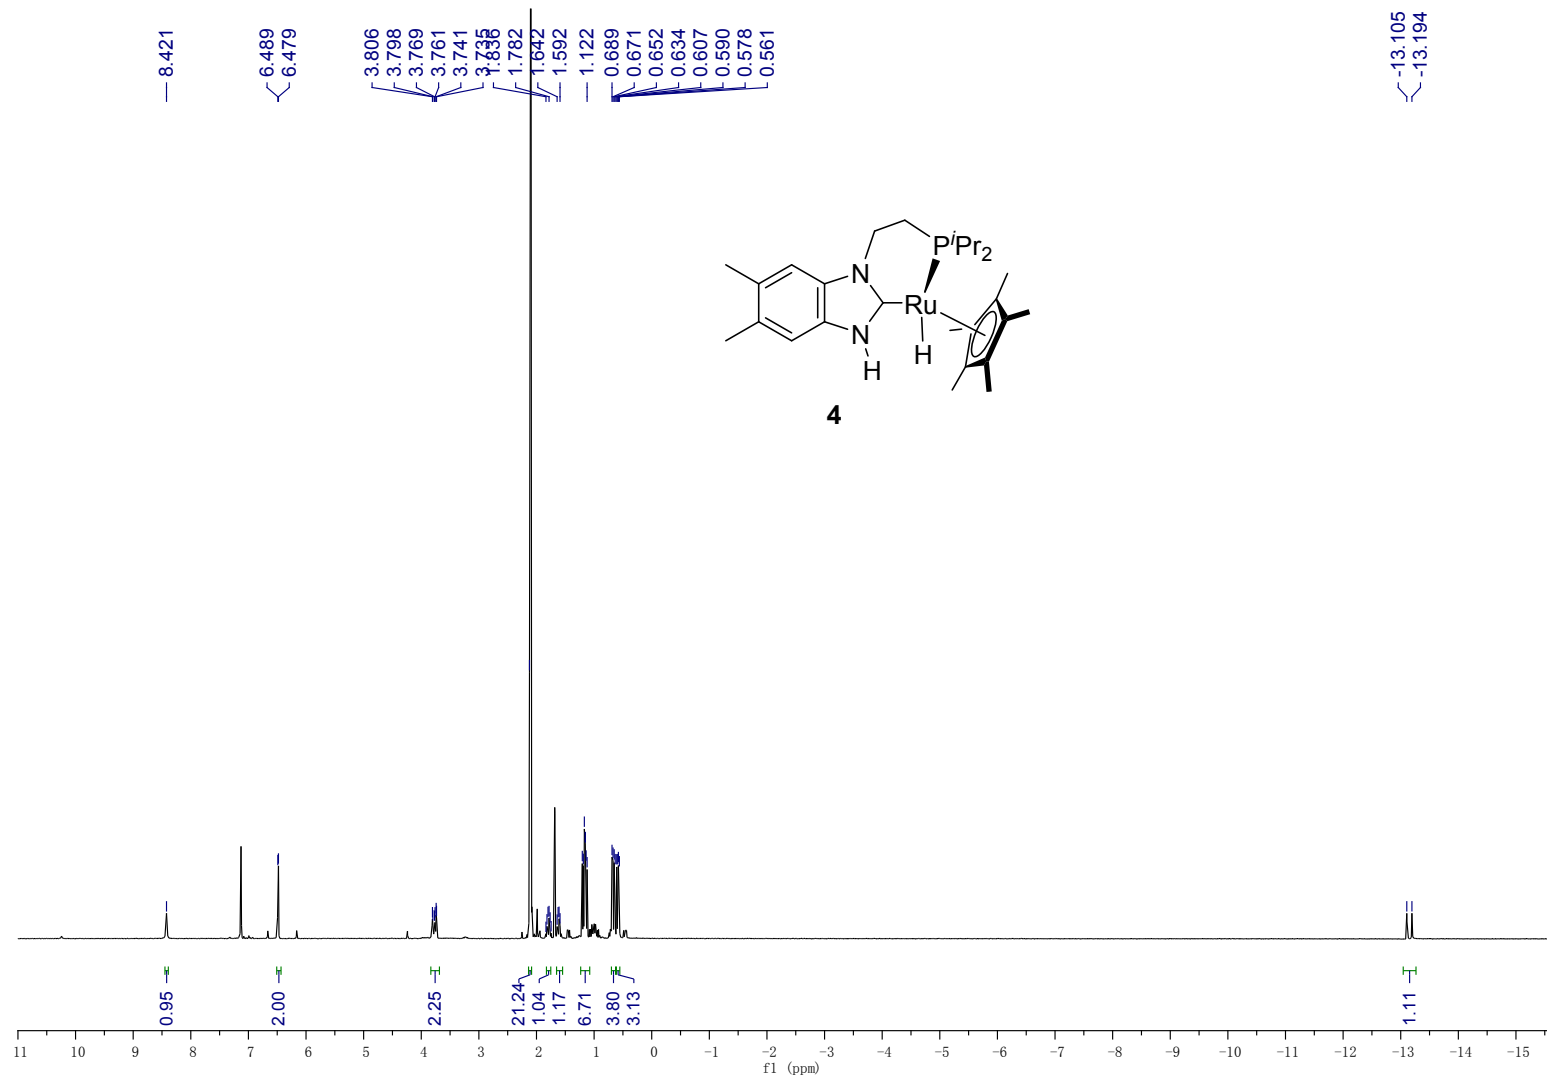



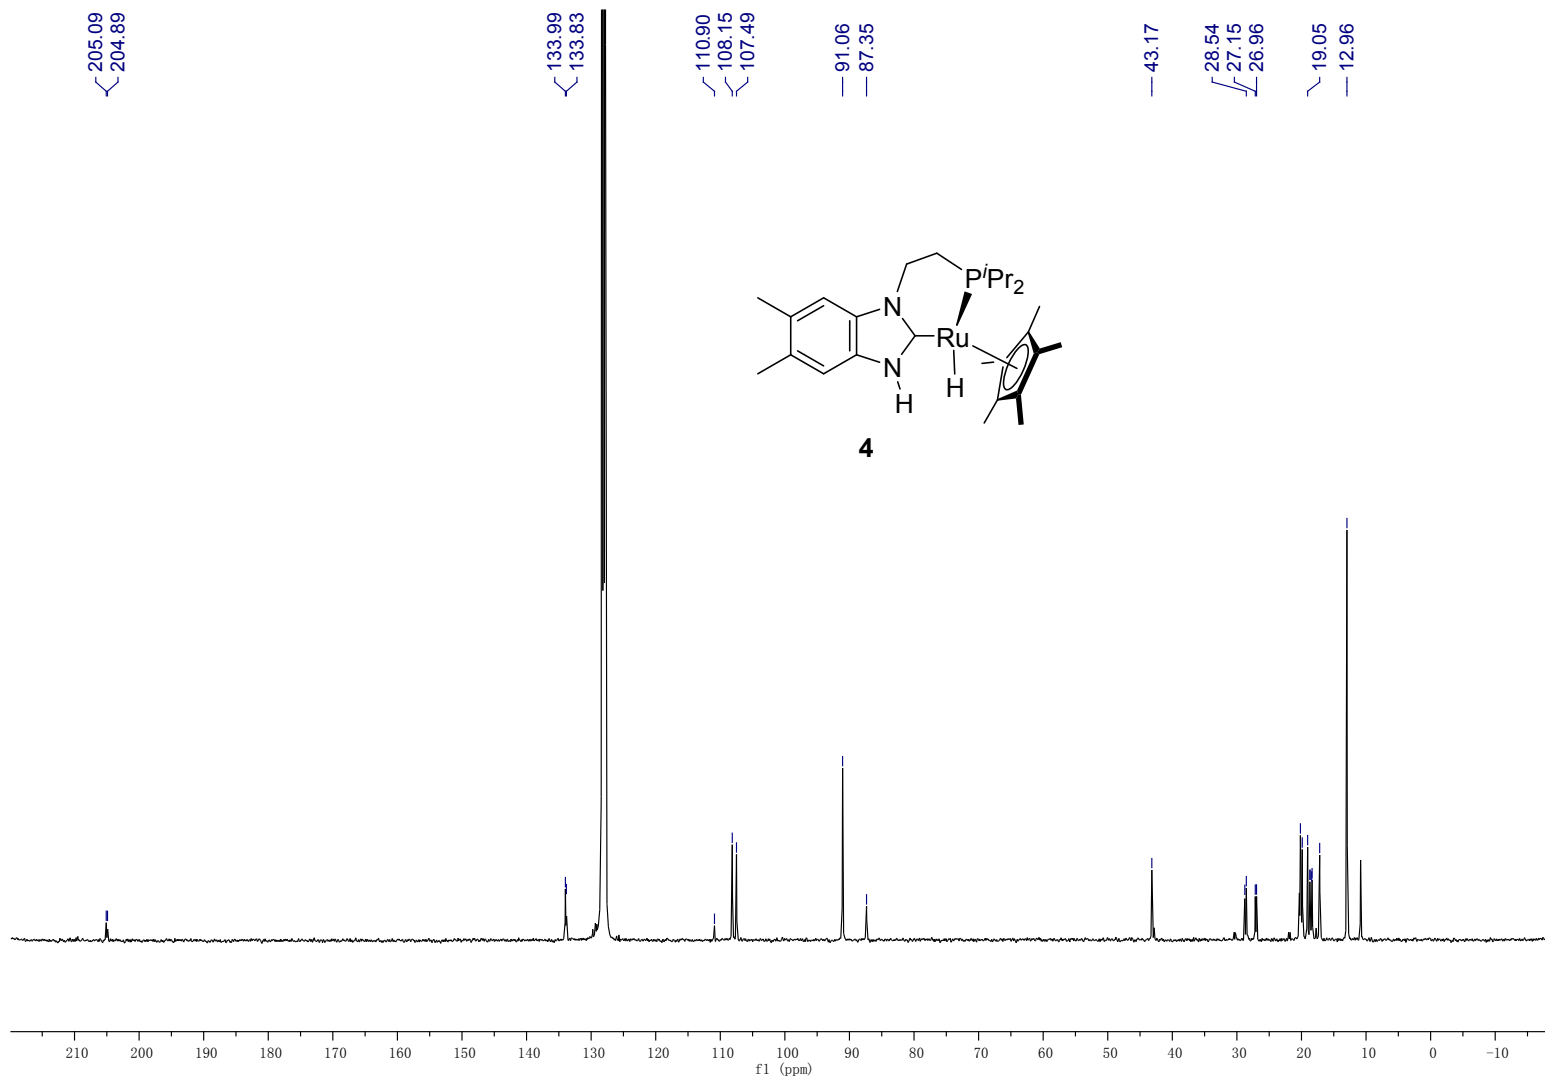

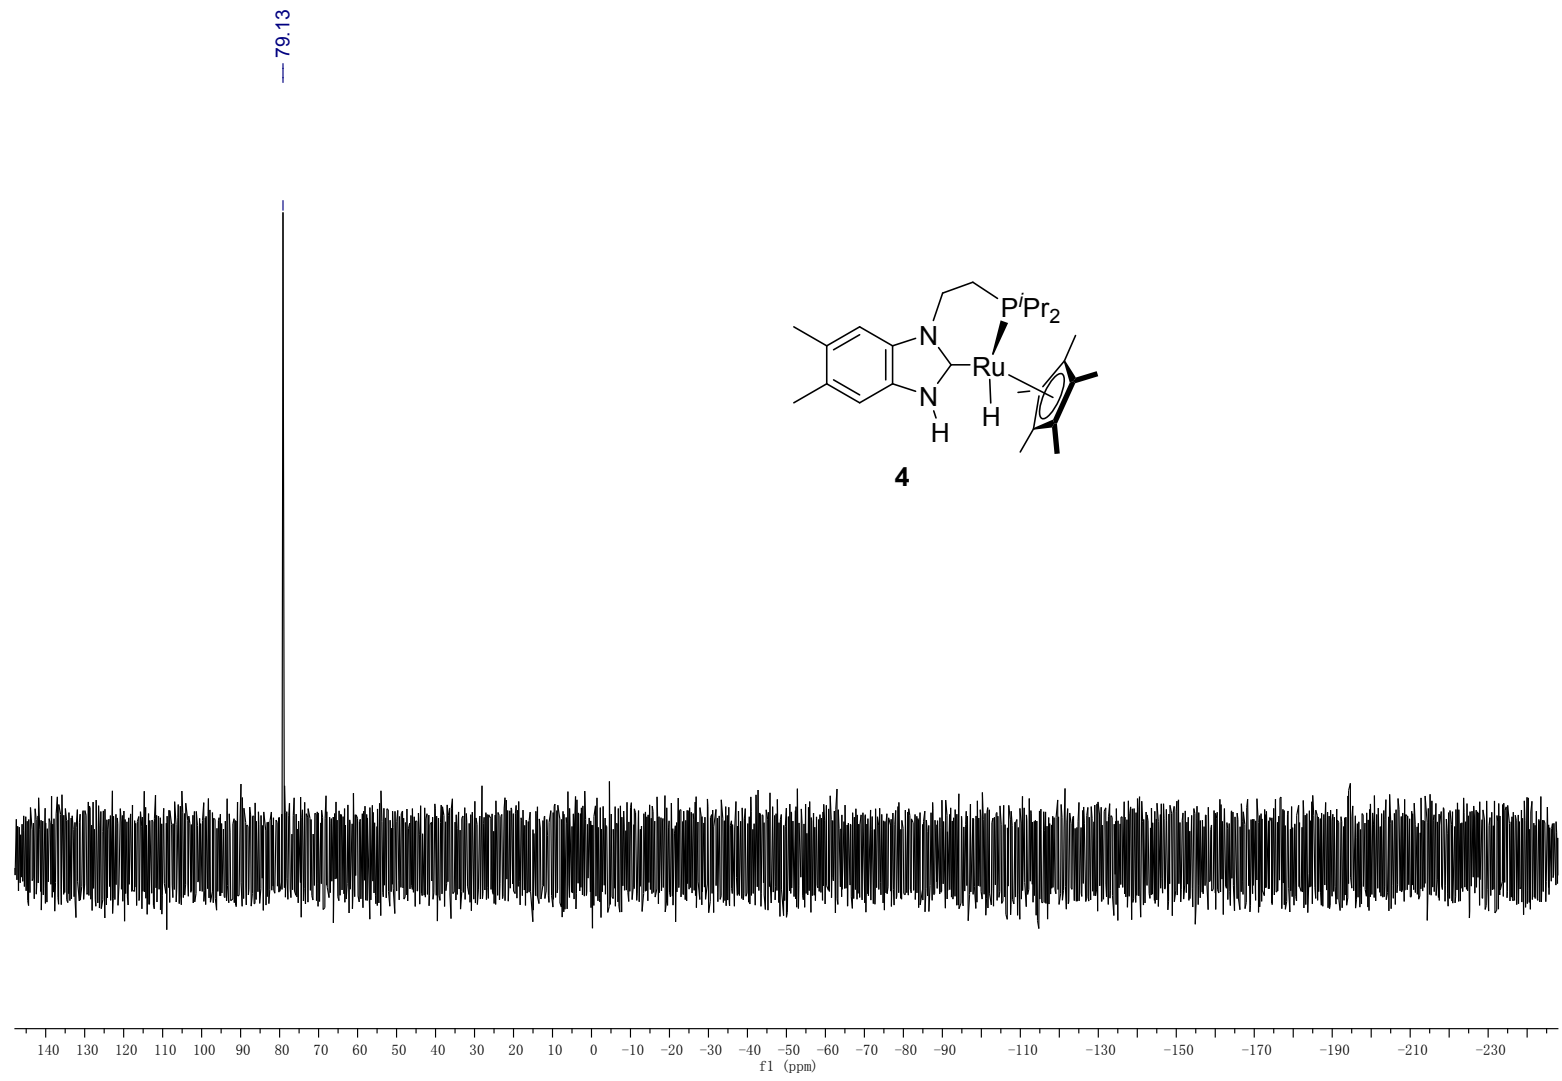

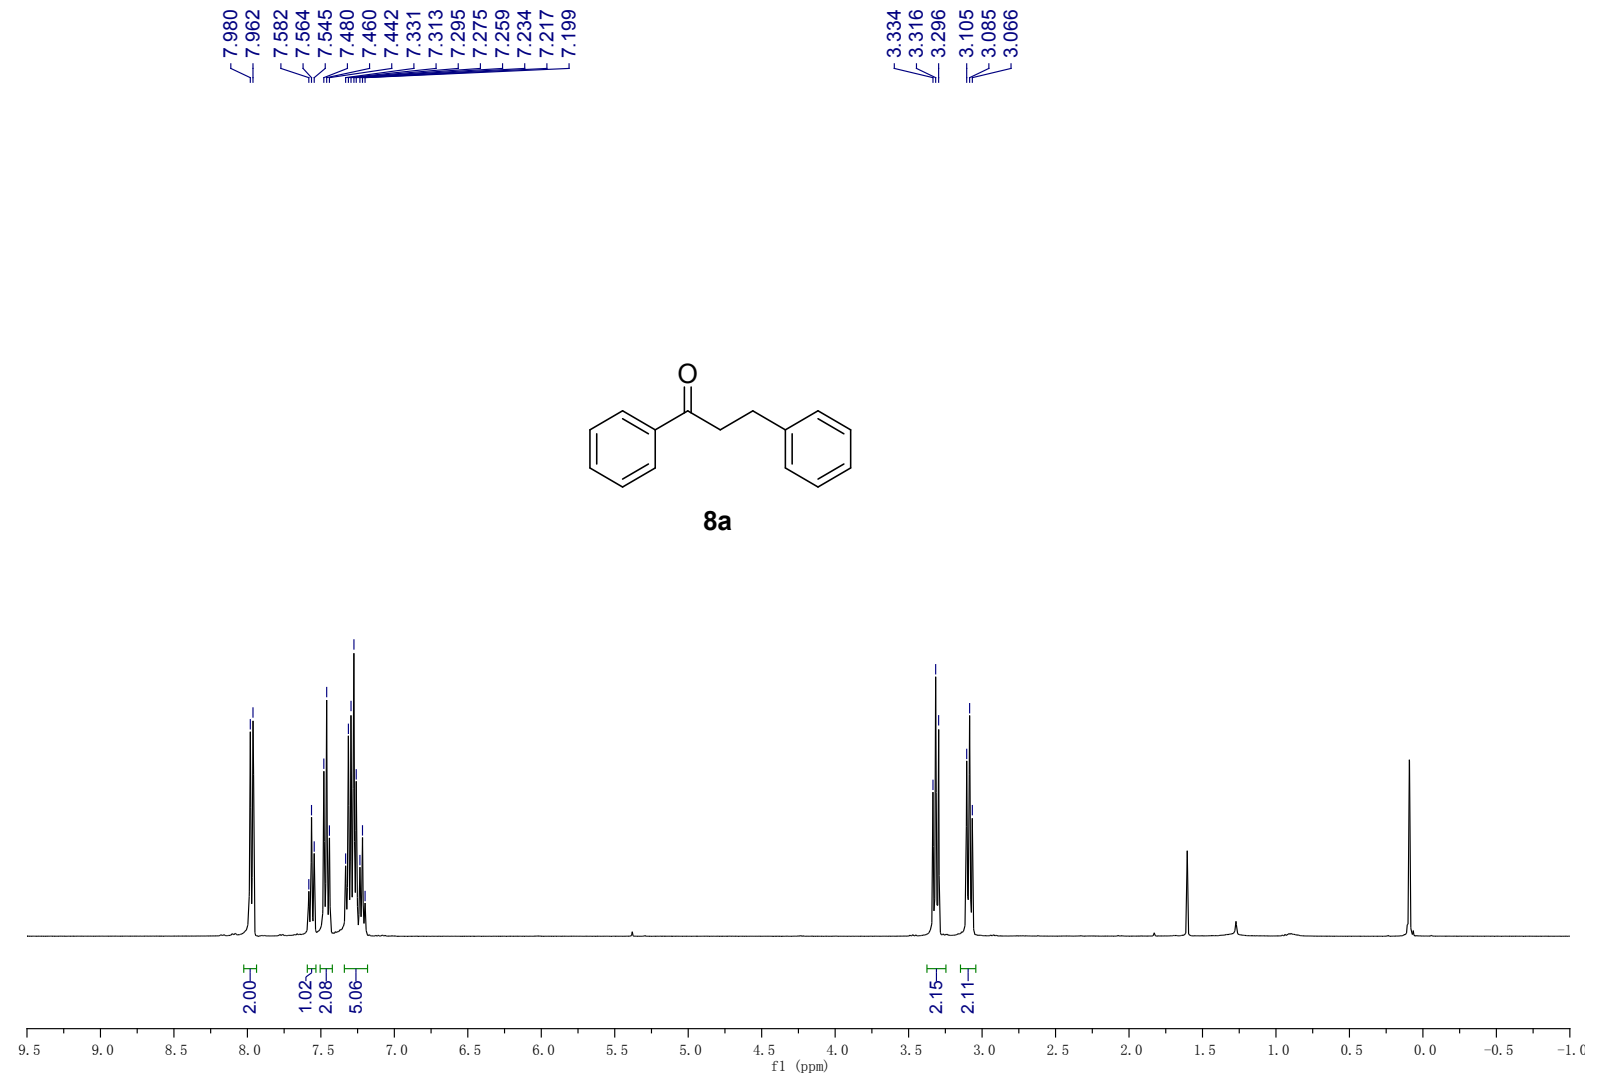

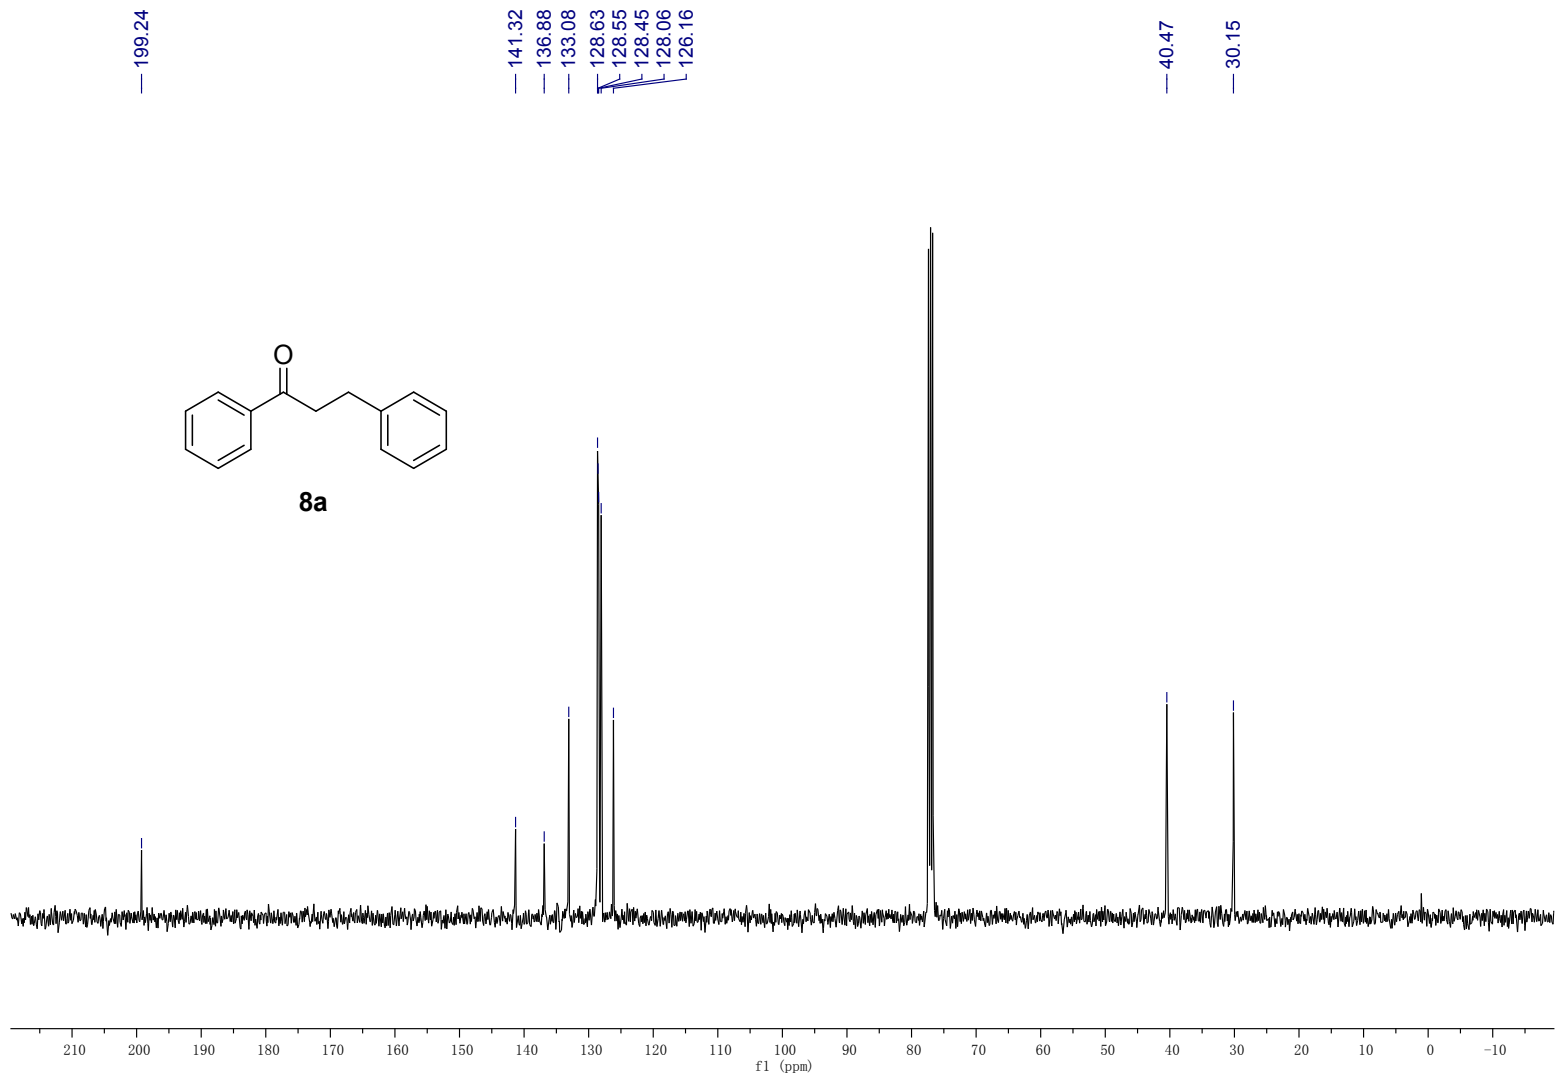

7.958  
7.940  
7.564  
7.477  
7.439  
7.270  
7.249  
7.195  
7.174

3.302  
3.284  
3.264  
3.066  
3.047  
3.028

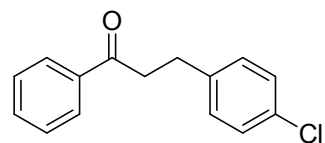

8b

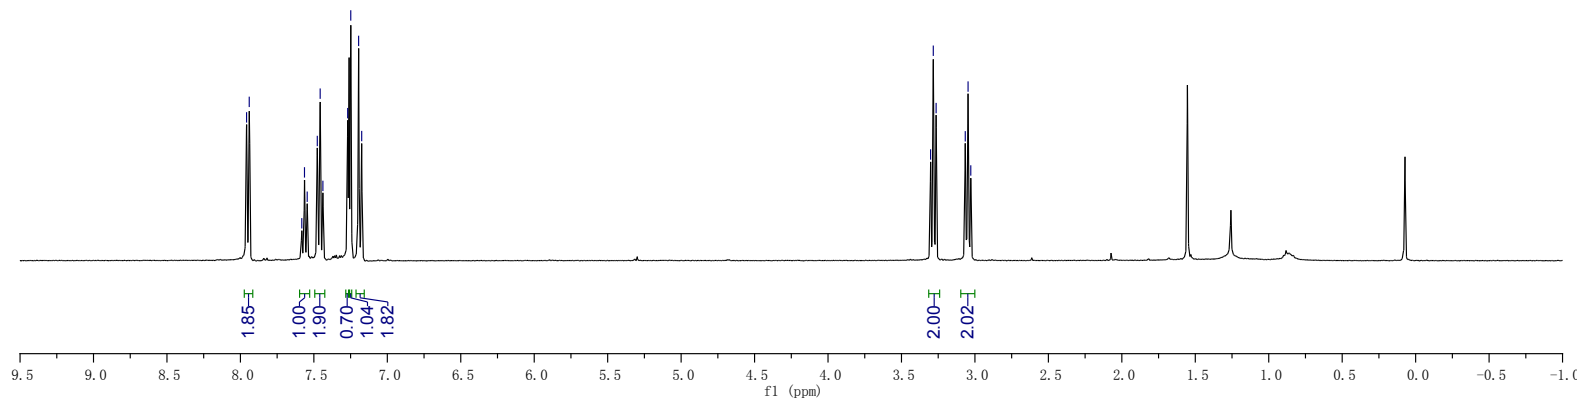

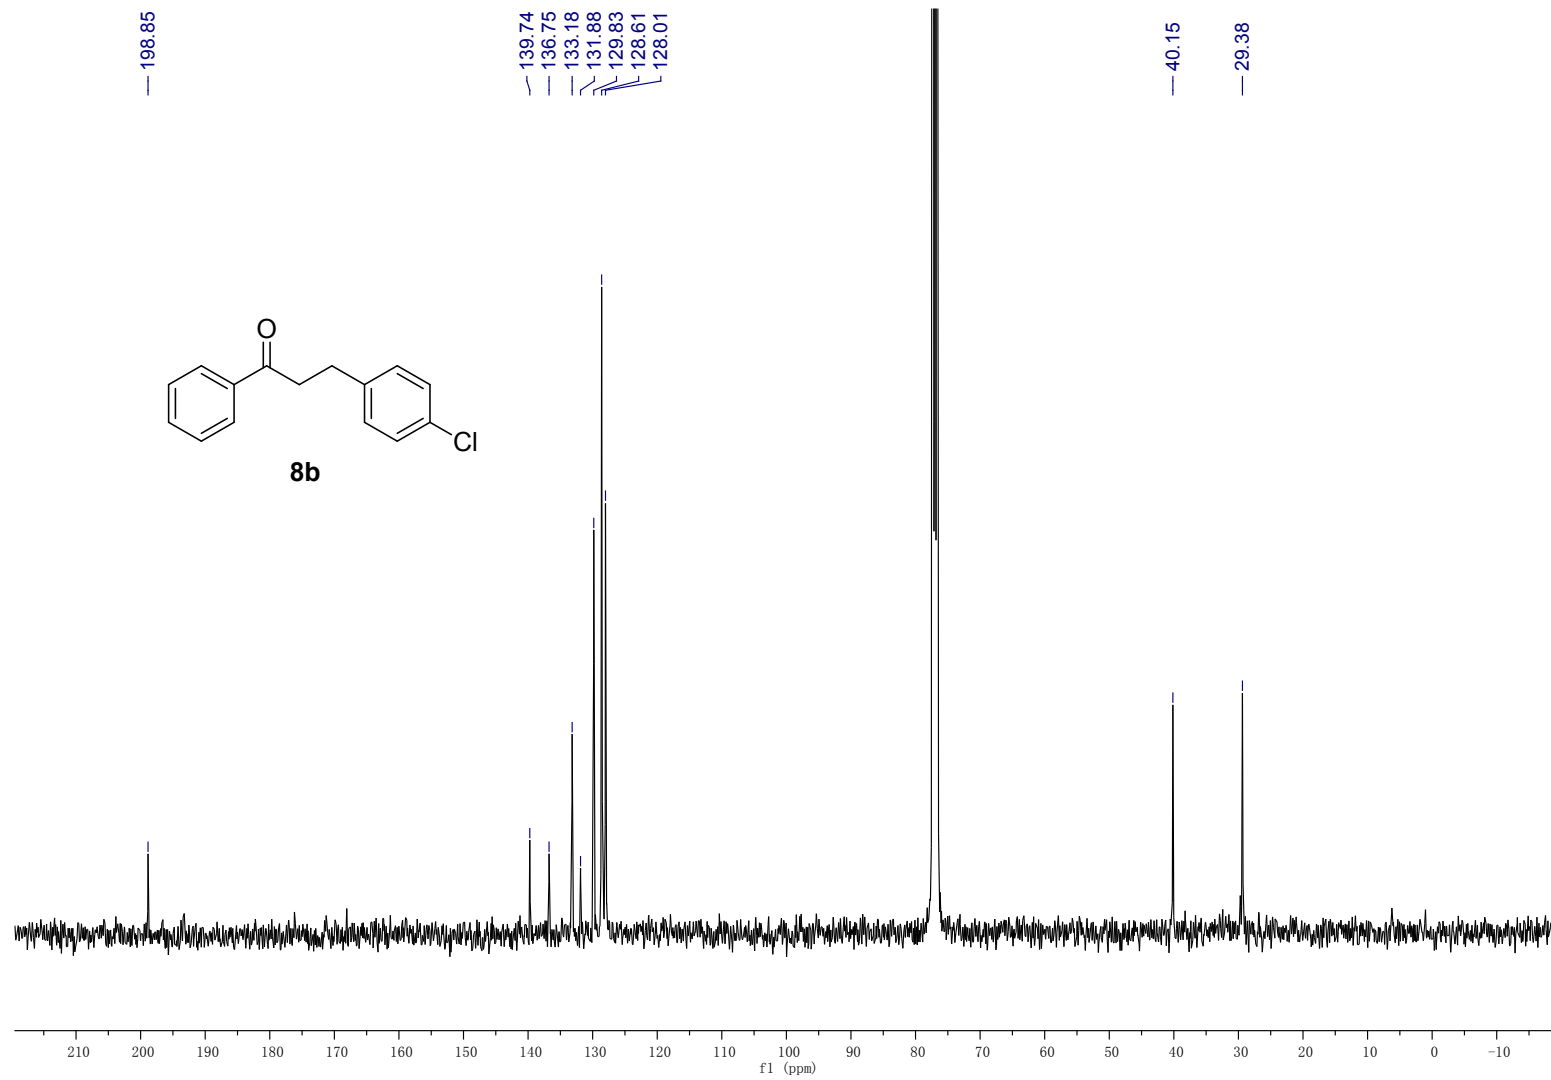

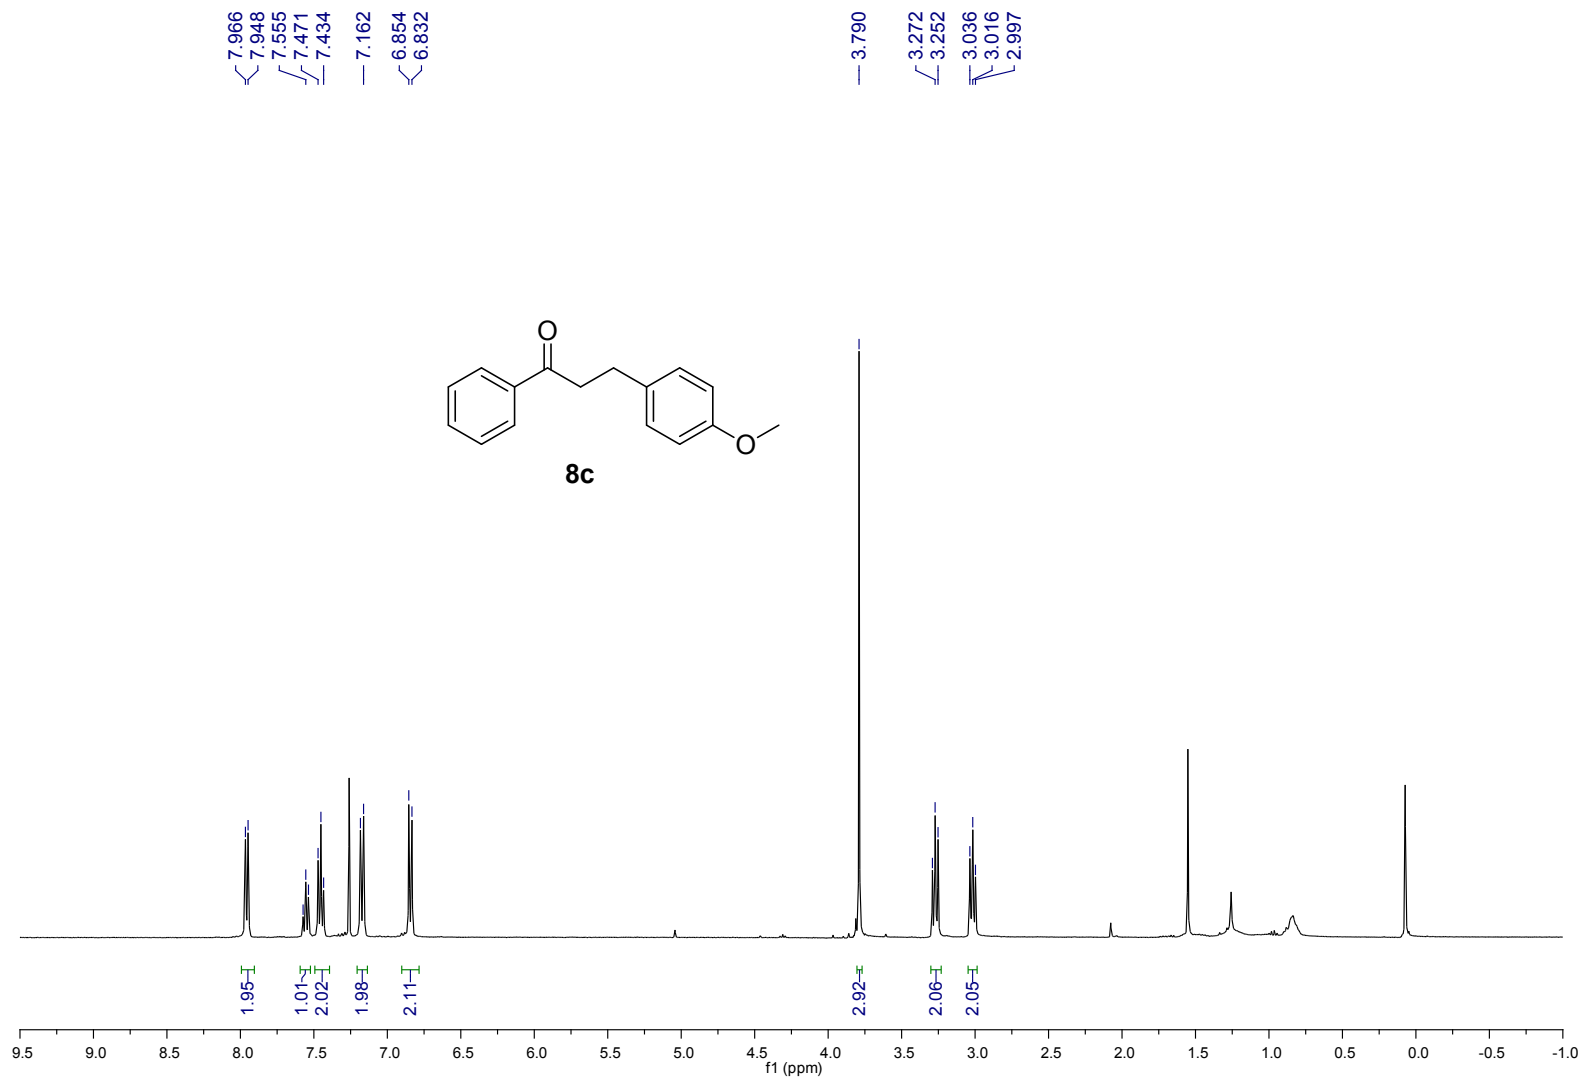

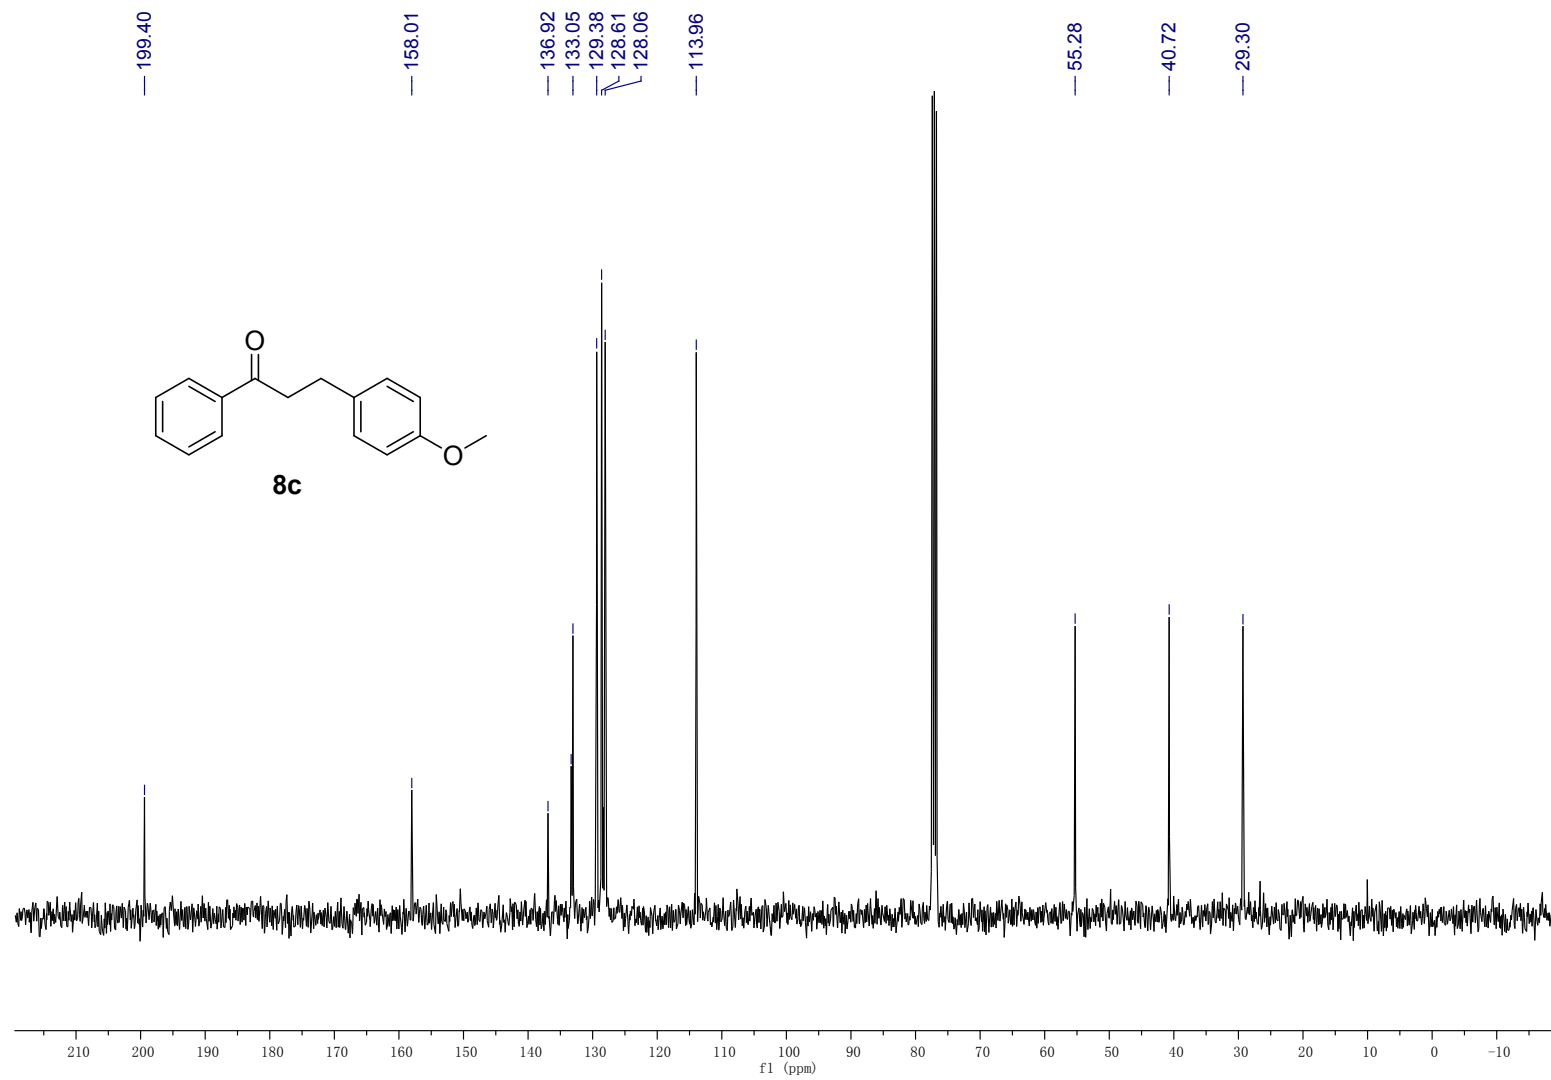



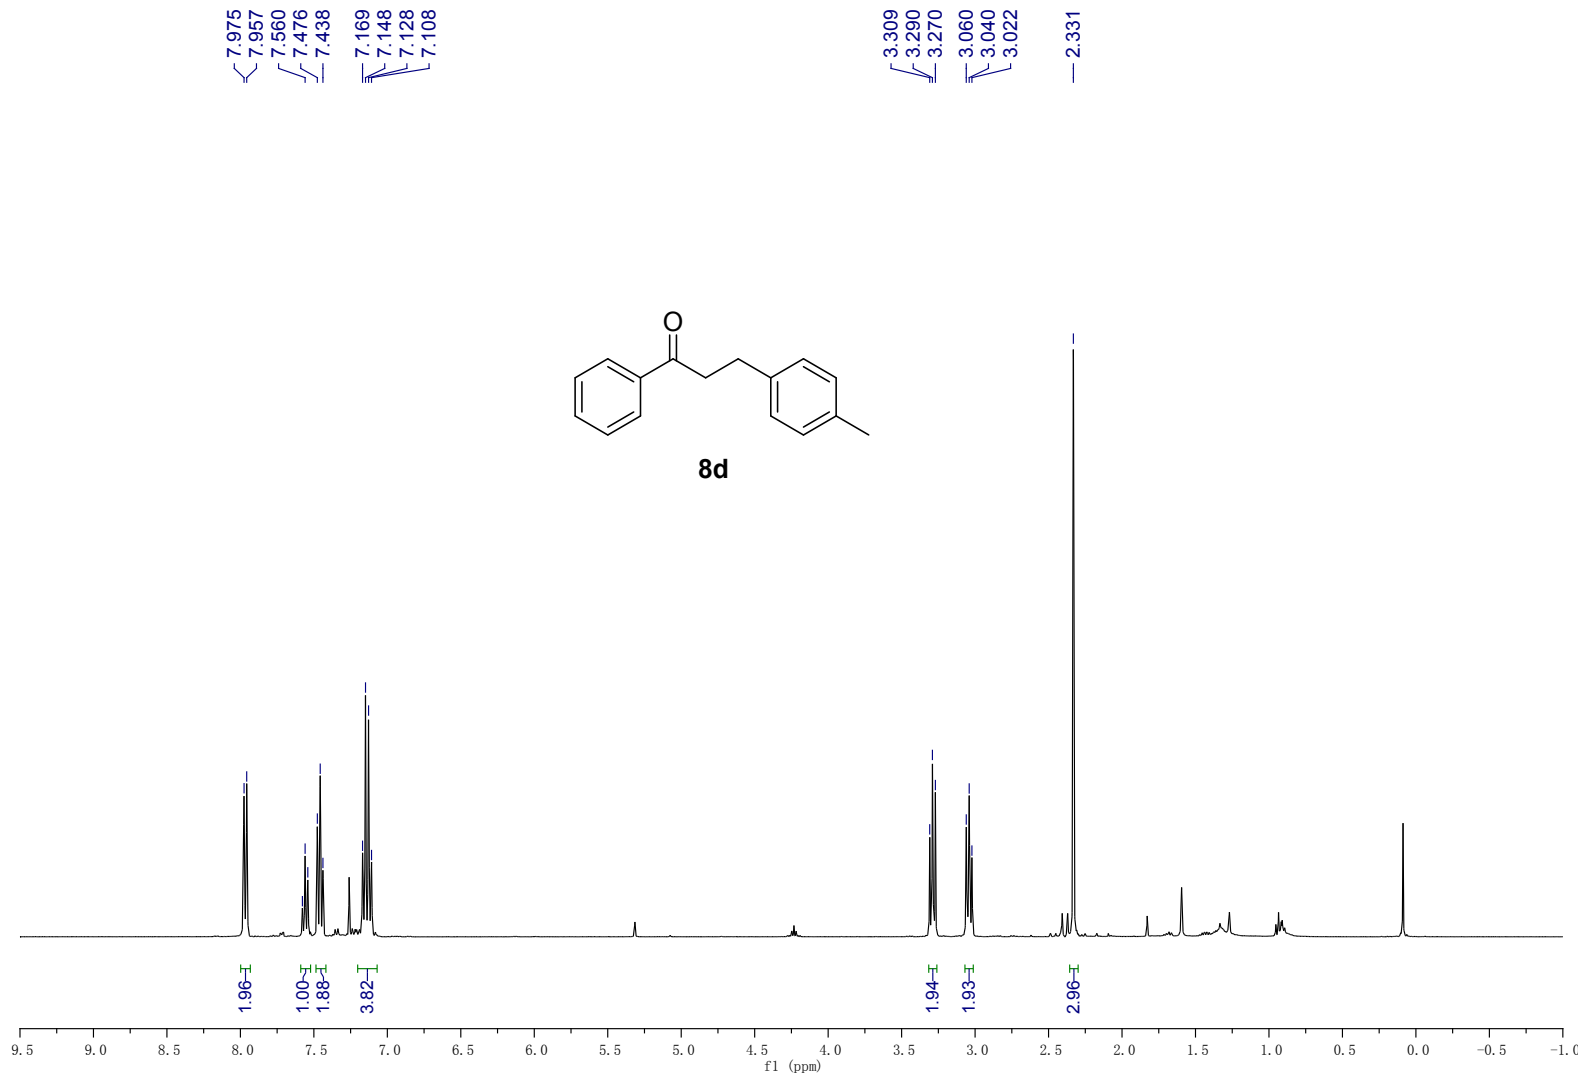

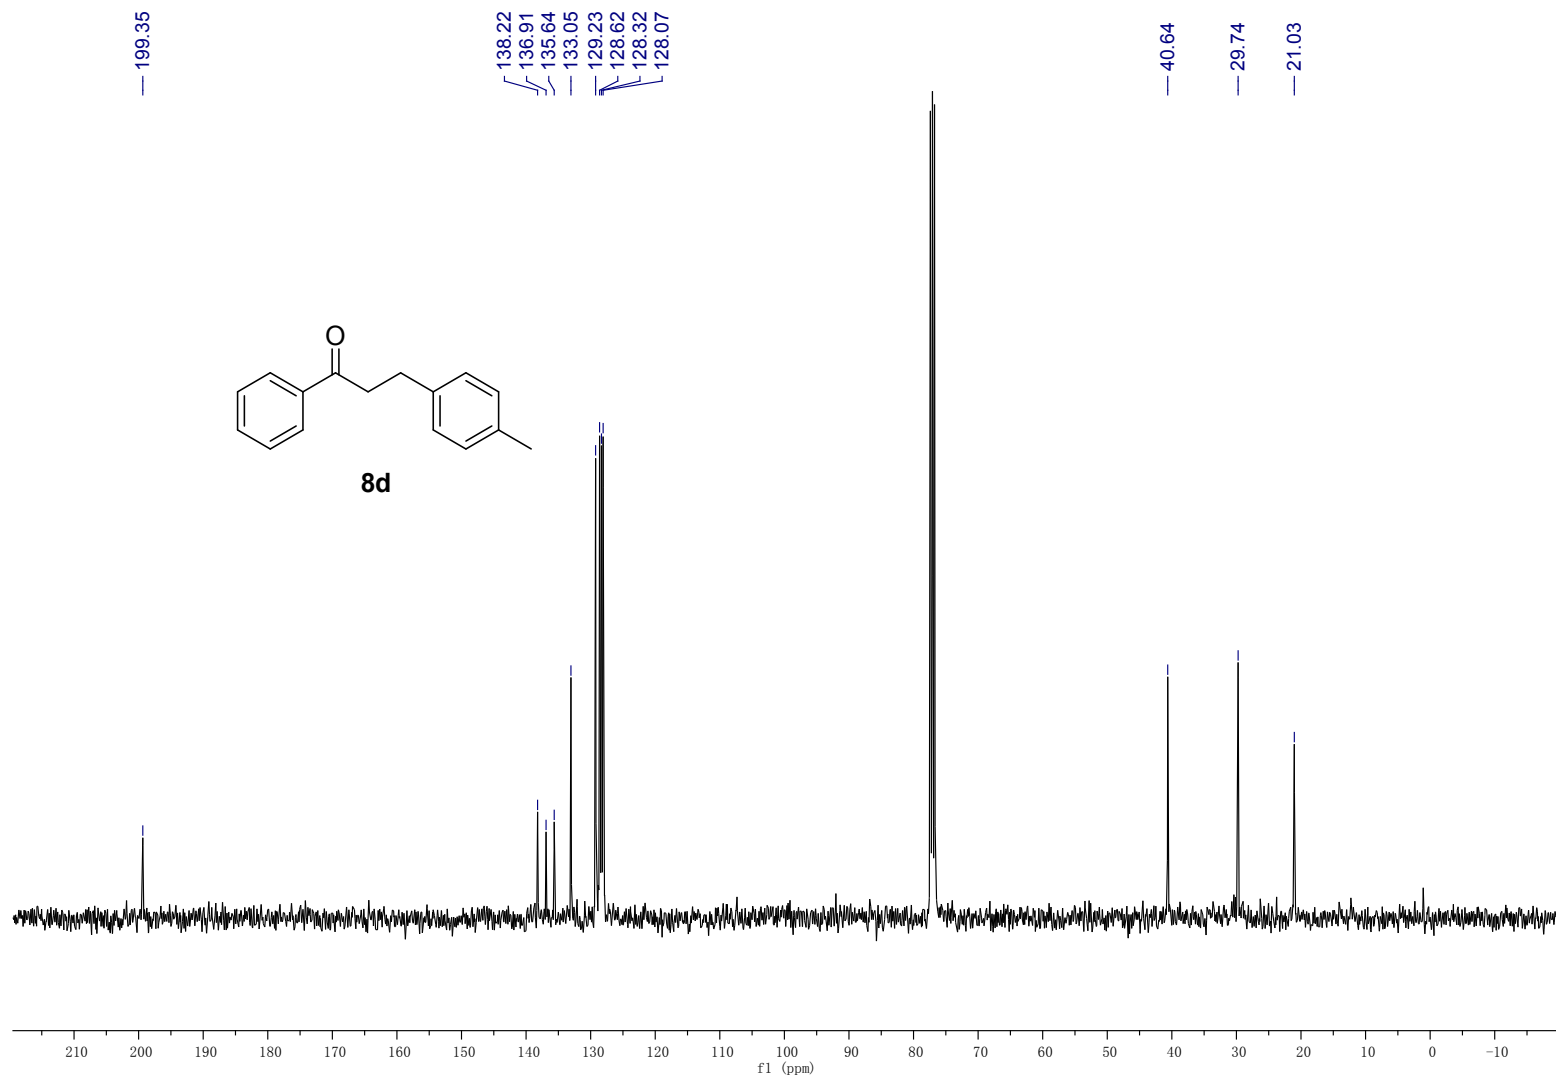

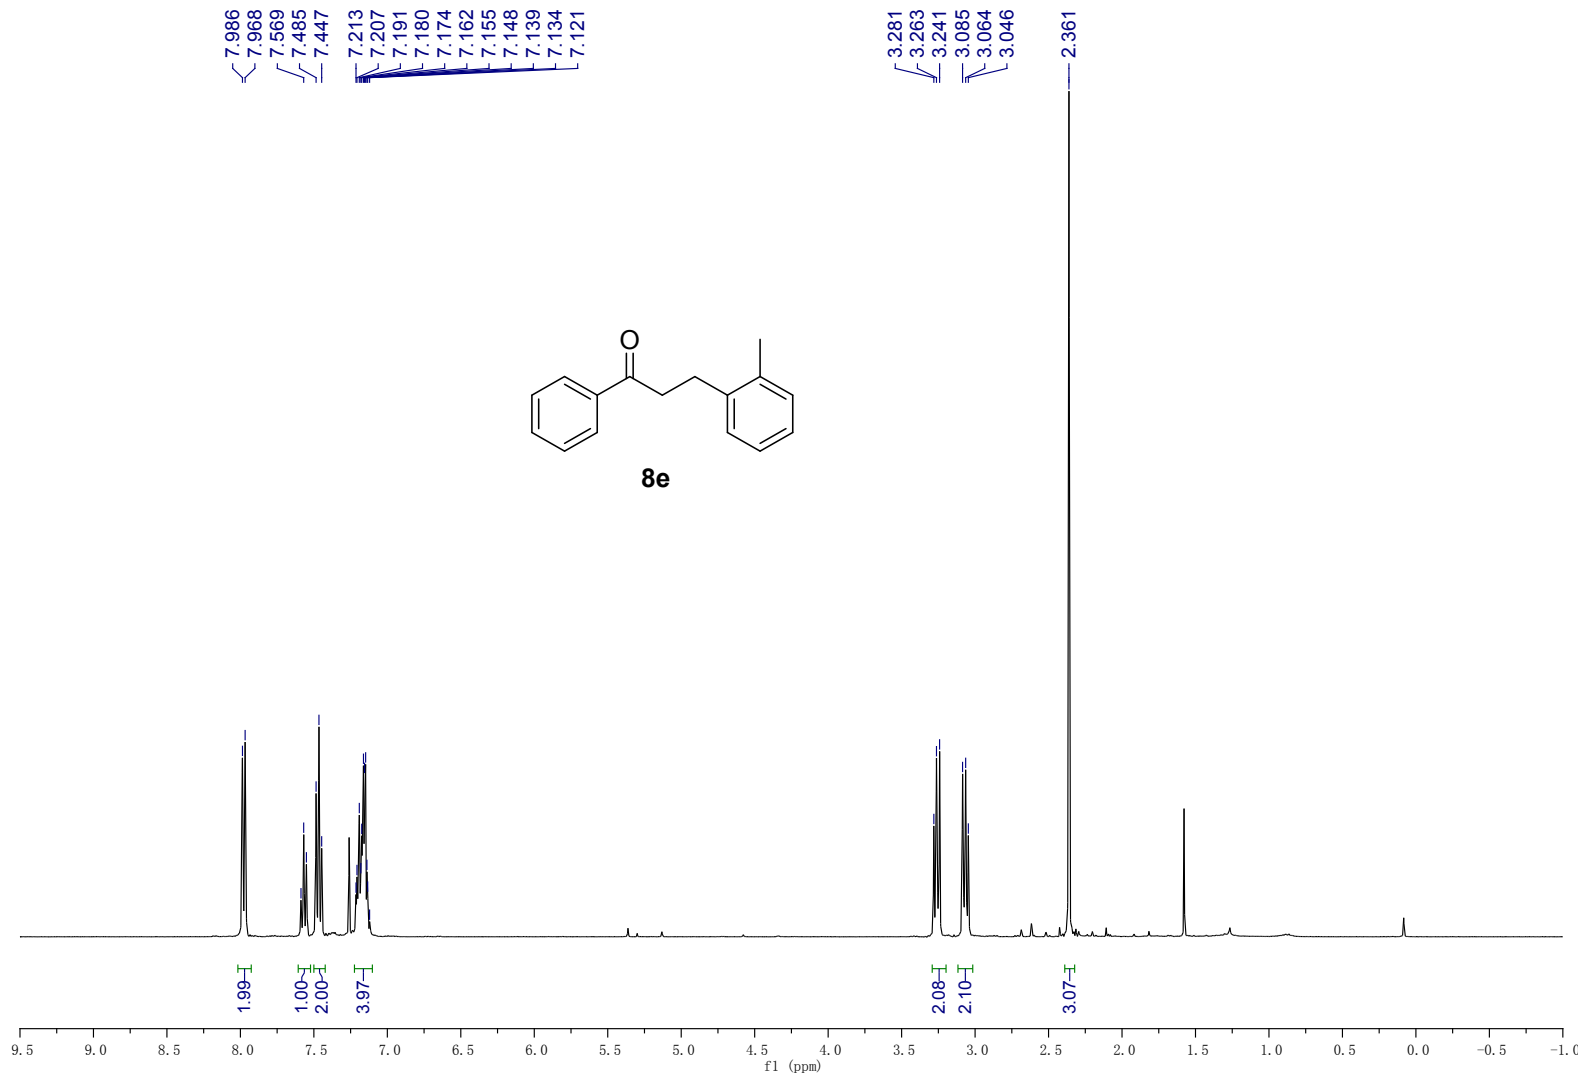

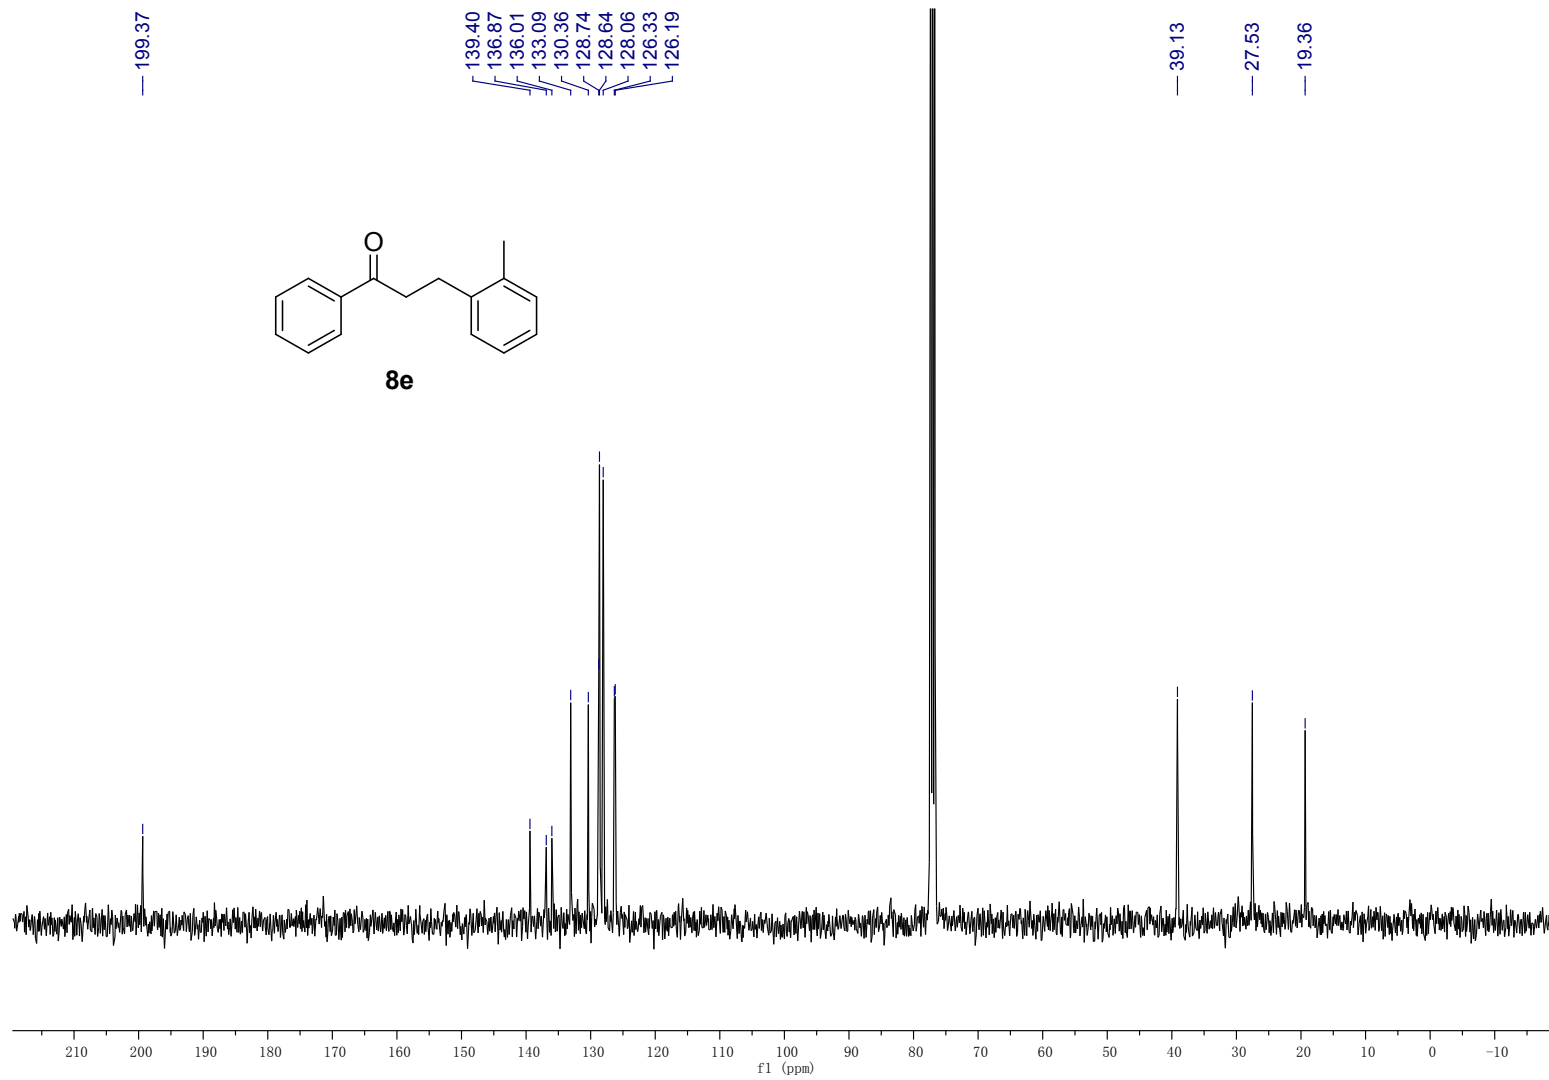

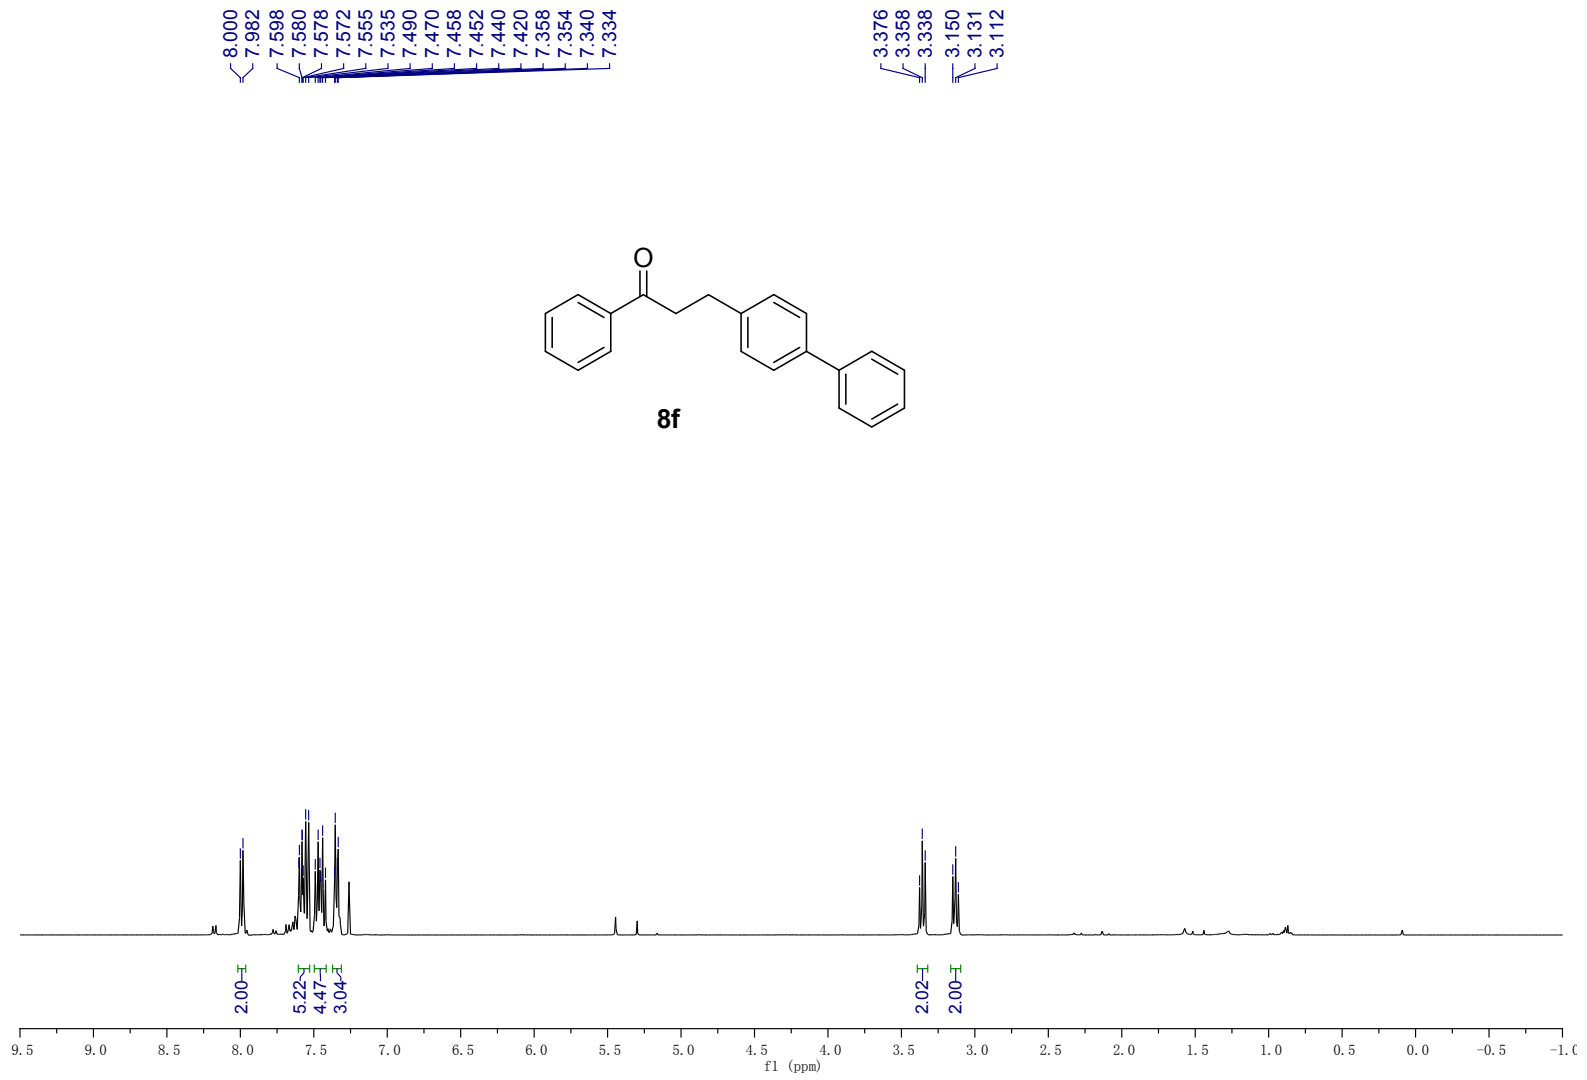

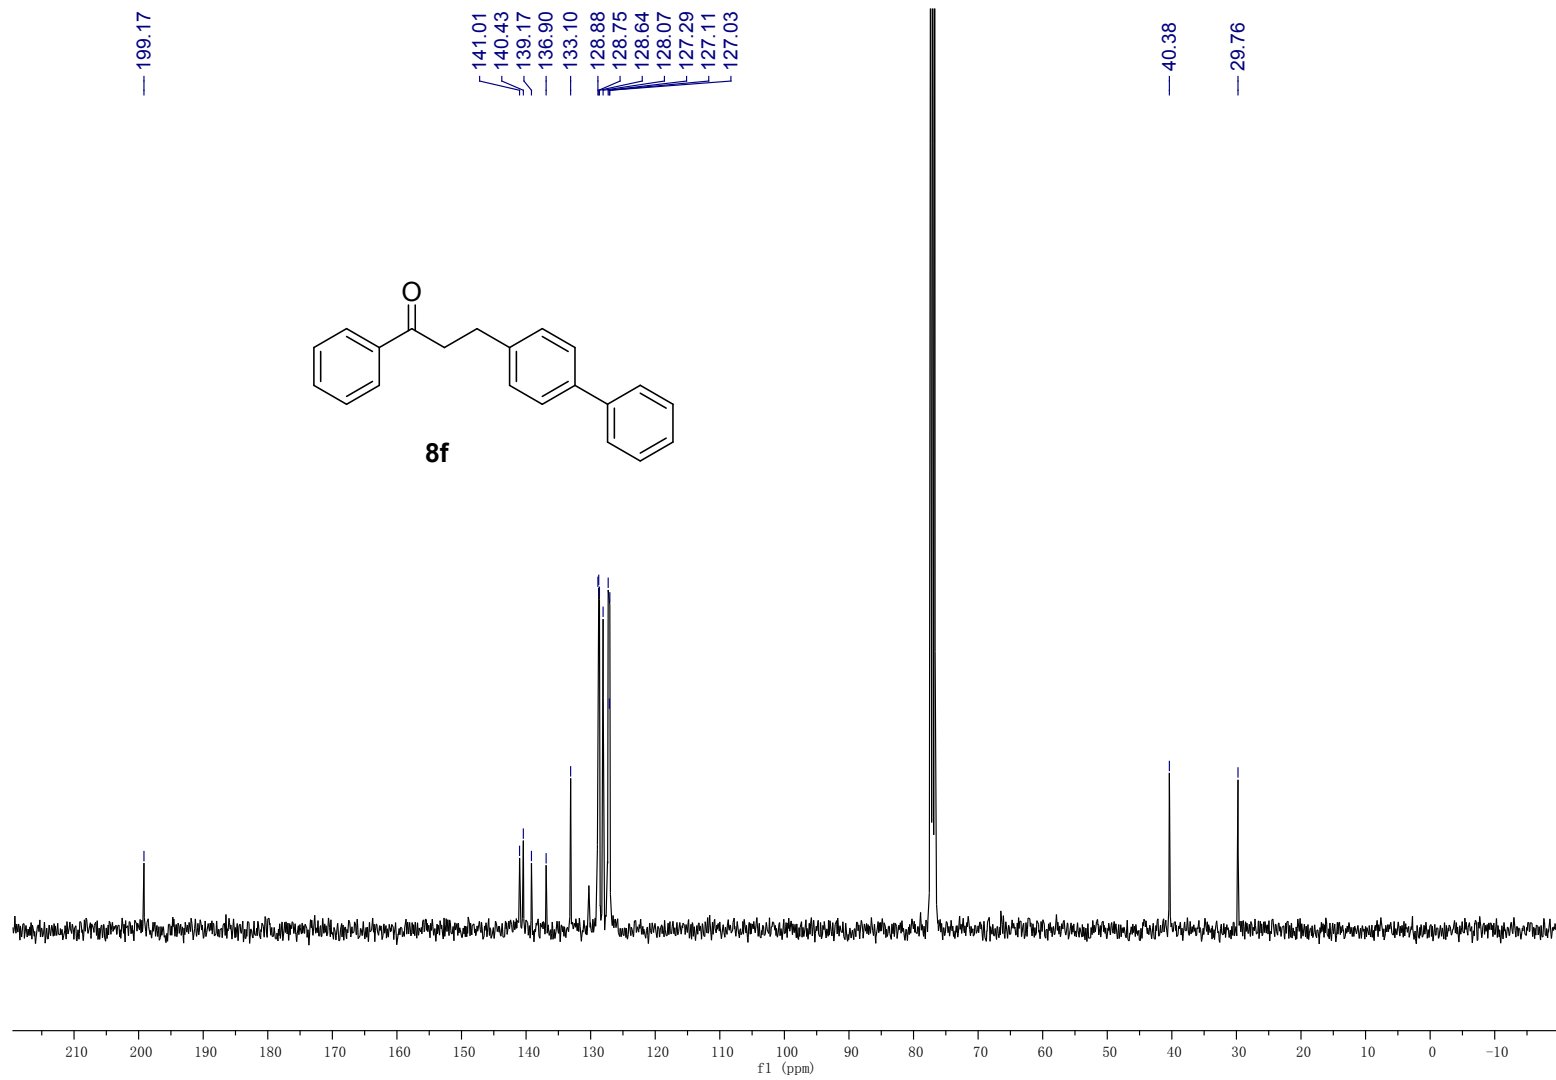

7.965  
7.944  
7.860  
7.474  
7.457  
7.437  
6.747  
6.731  
6.707  
6.688  
5.924  
5.921

3.280  
3.259  
3.242  
3.012  
2.993  
2.975

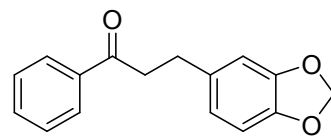

8g

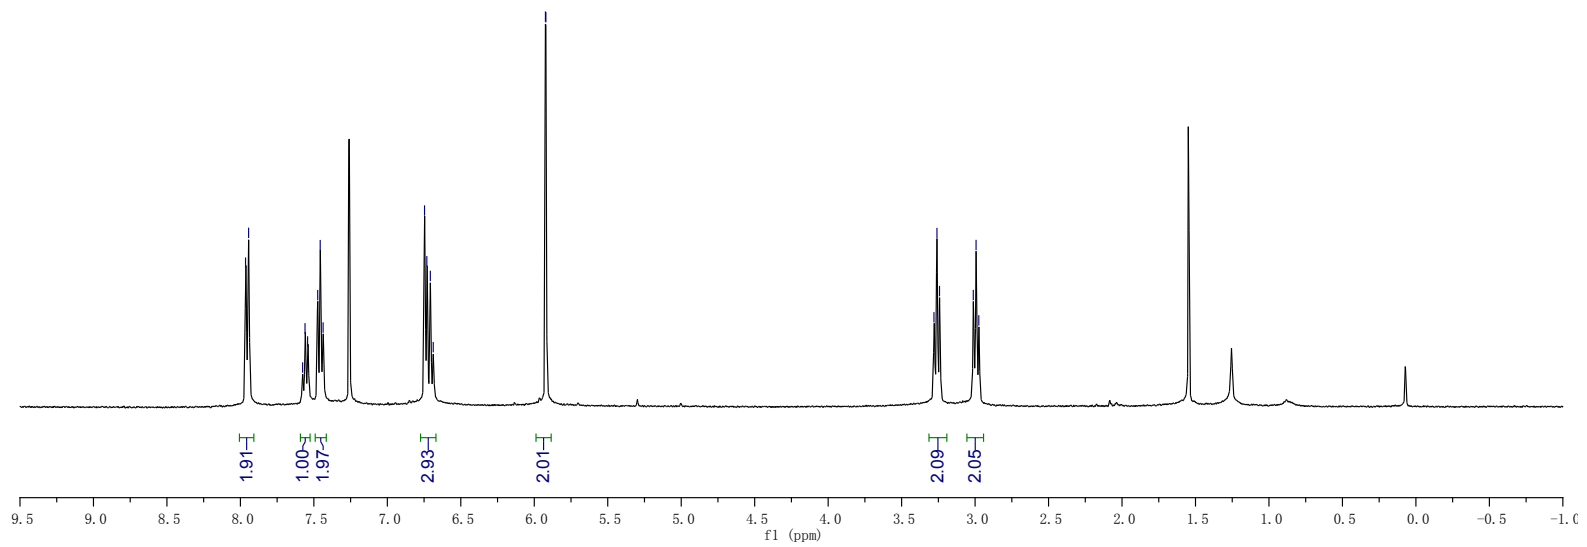

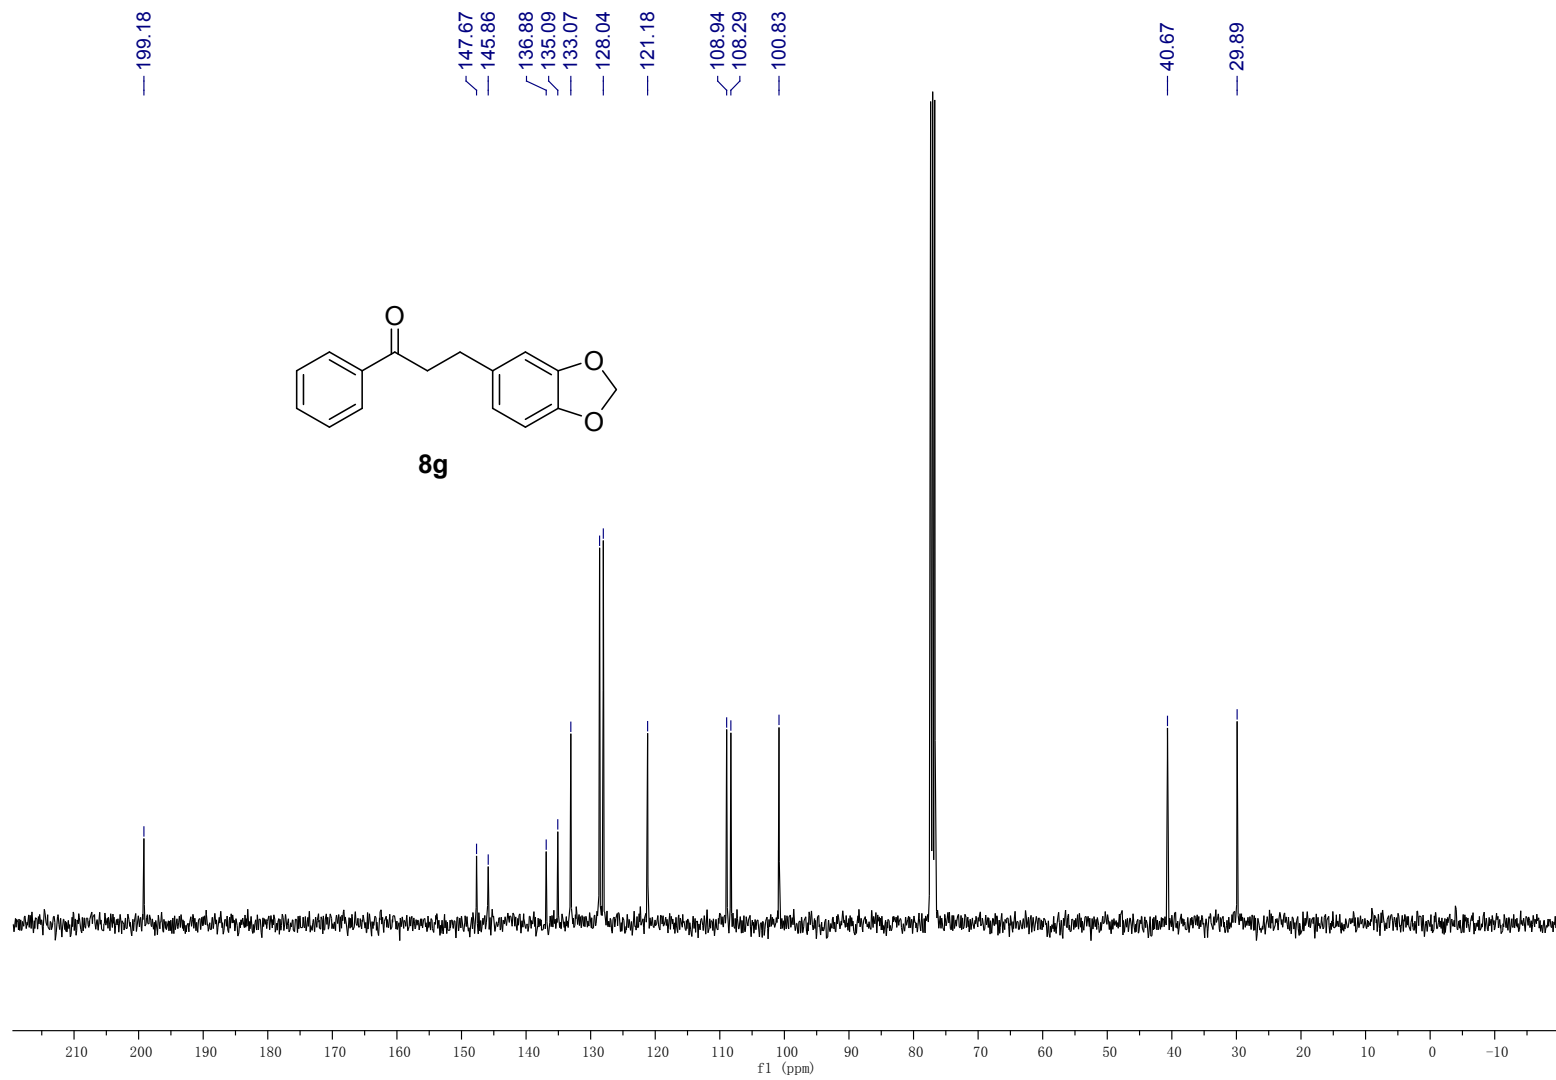



7.988  
7.970  
7.568  
7.550  
7.485  
7.466  
7.447  
7.315

6.293  
6.286  
6.281  
6.059  
6.053

3.360  
3.342  
3.322  
3.117  
3.098  
3.080

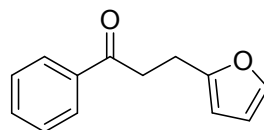

8h

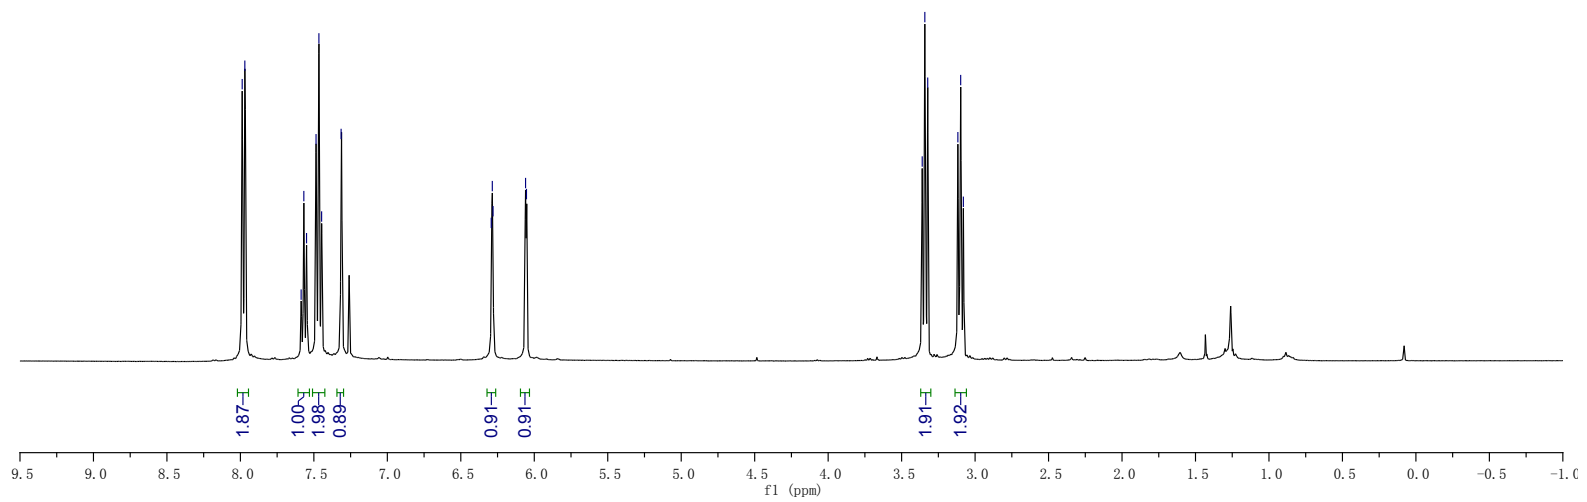

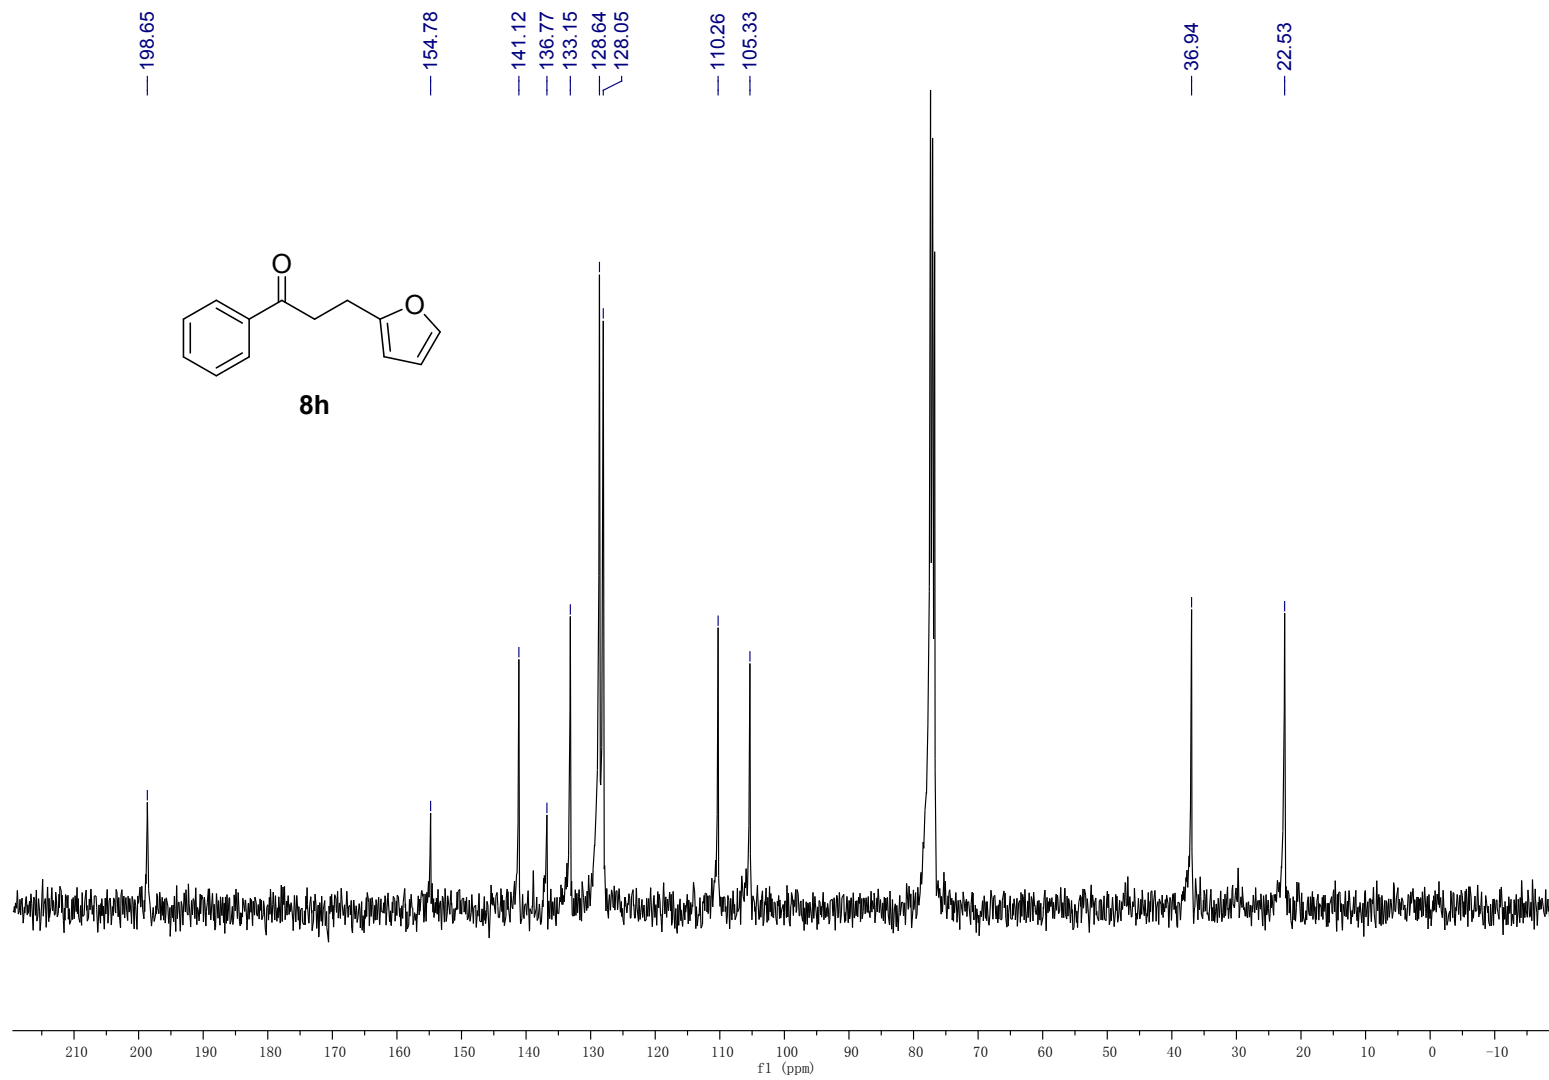

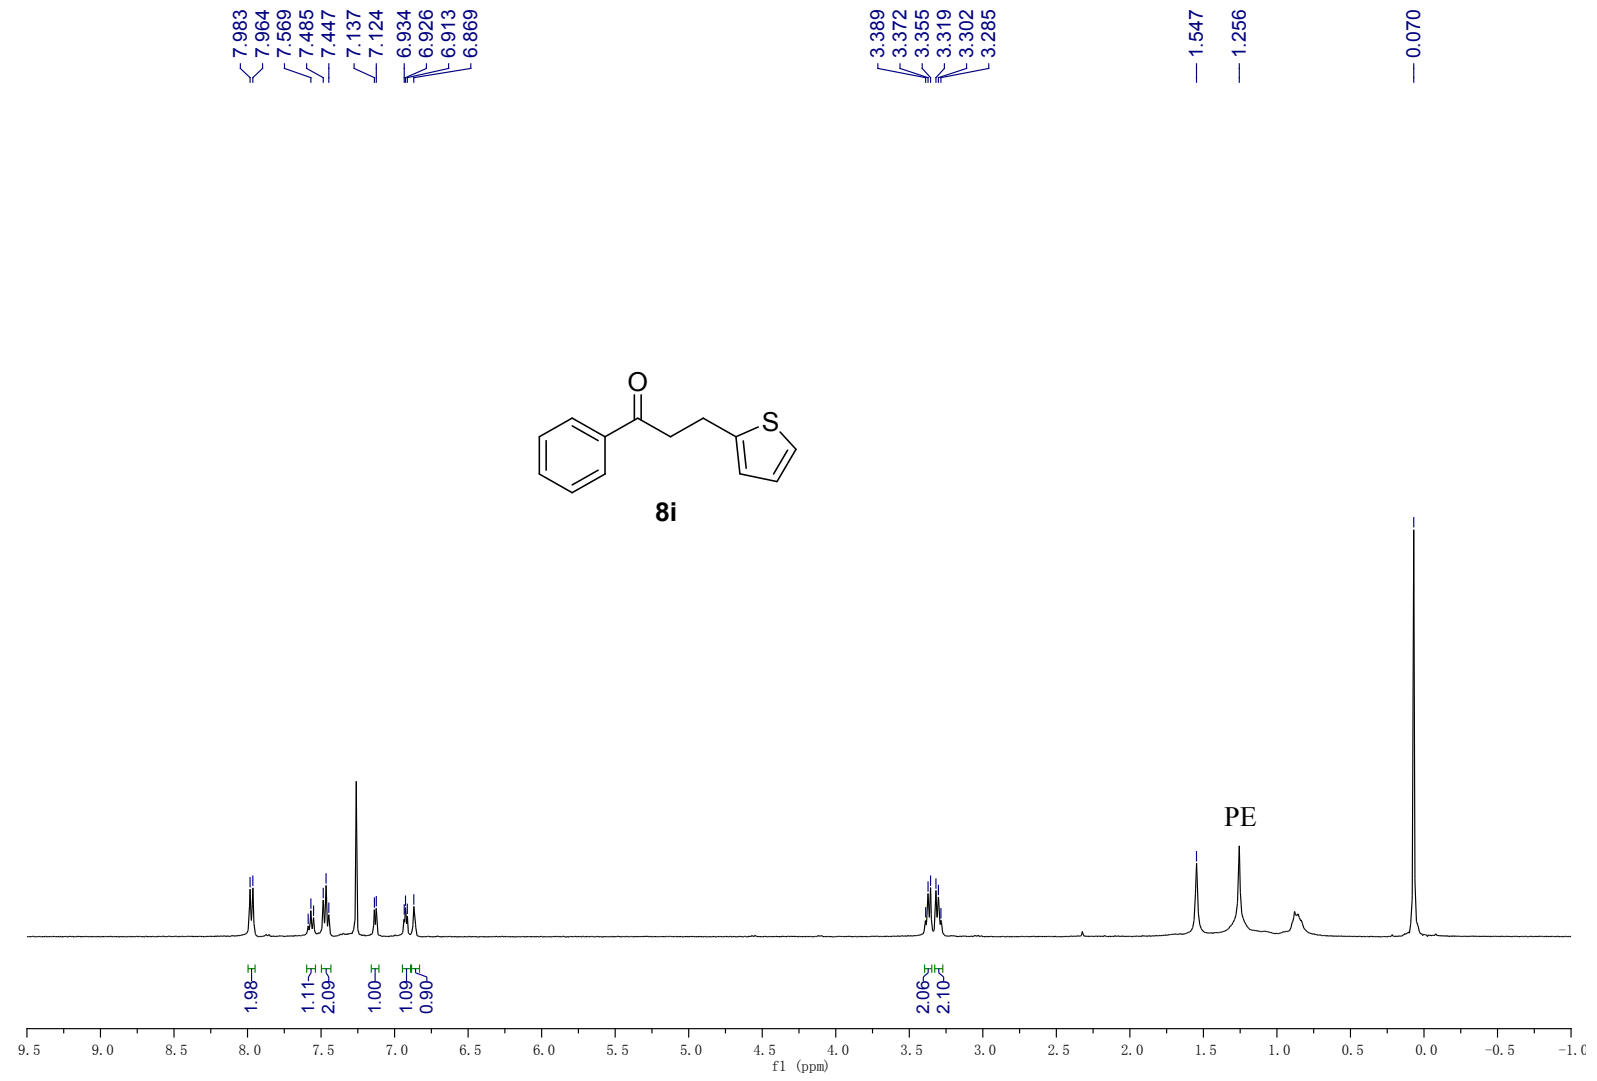

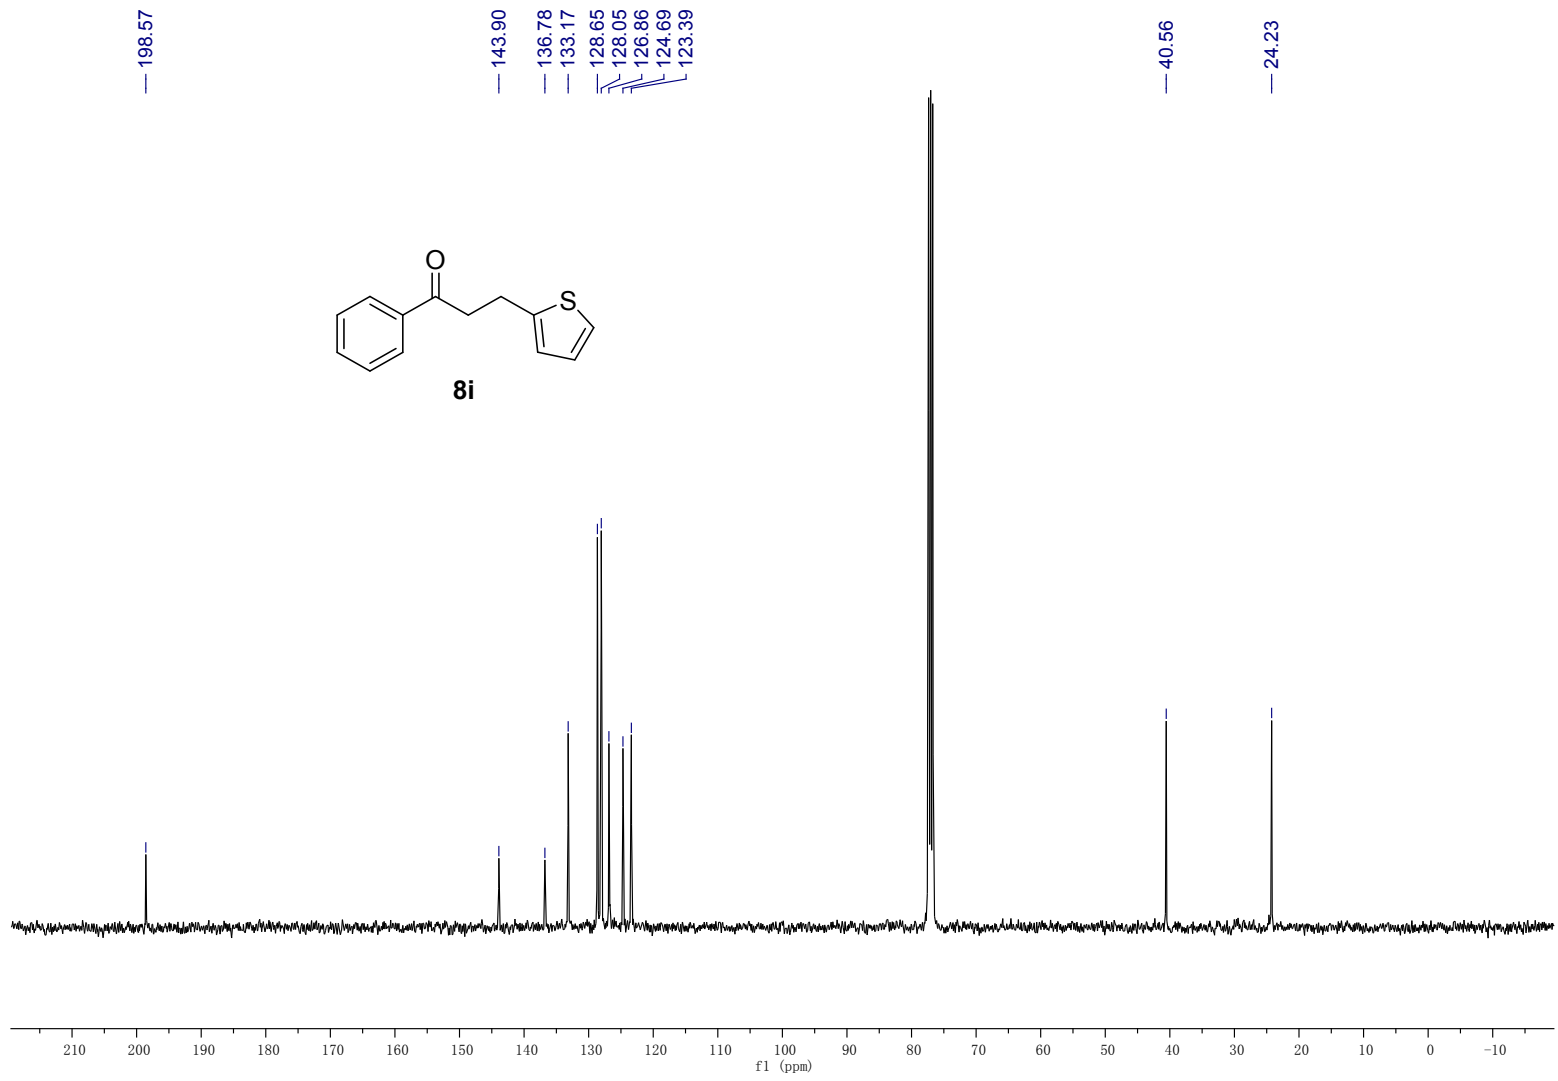

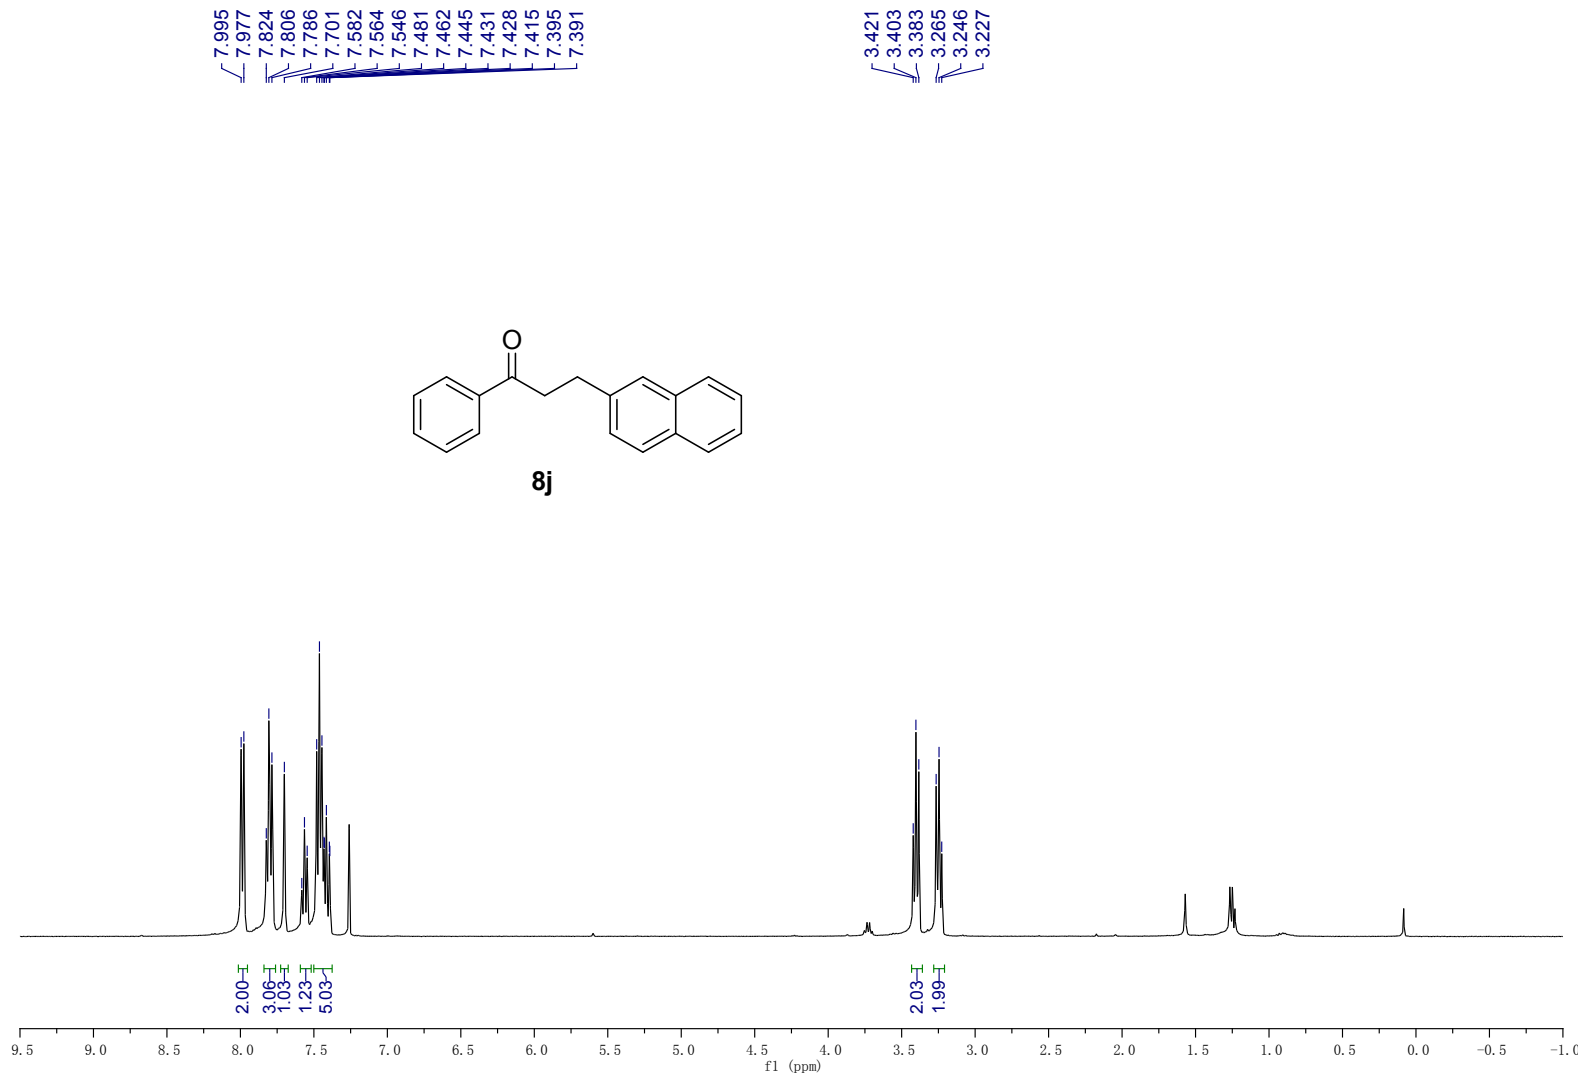

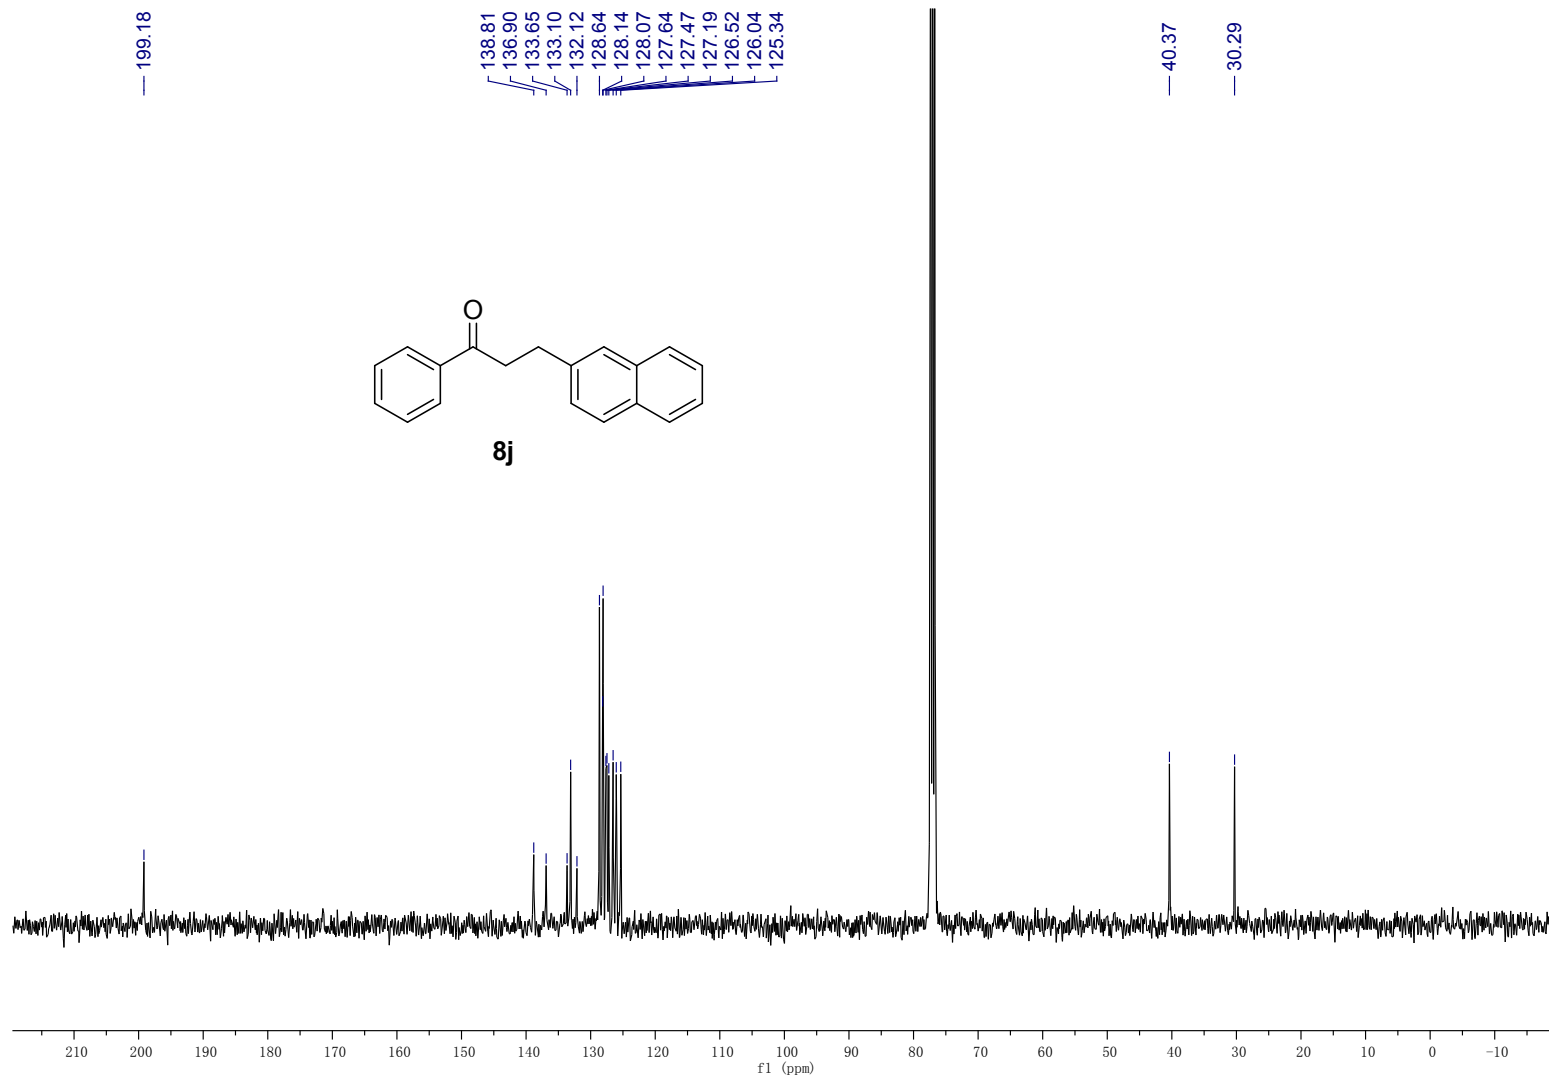

7.884  
7.863  
7.329  
7.311  
7.298  
7.293  
7.272  
7.267  
7.255  
7.247  
7.236  
7.232  
7.215

3.304  
3.287  
3.266  
3.092  
3.072  
3.053  
2.415

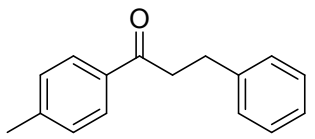

8k

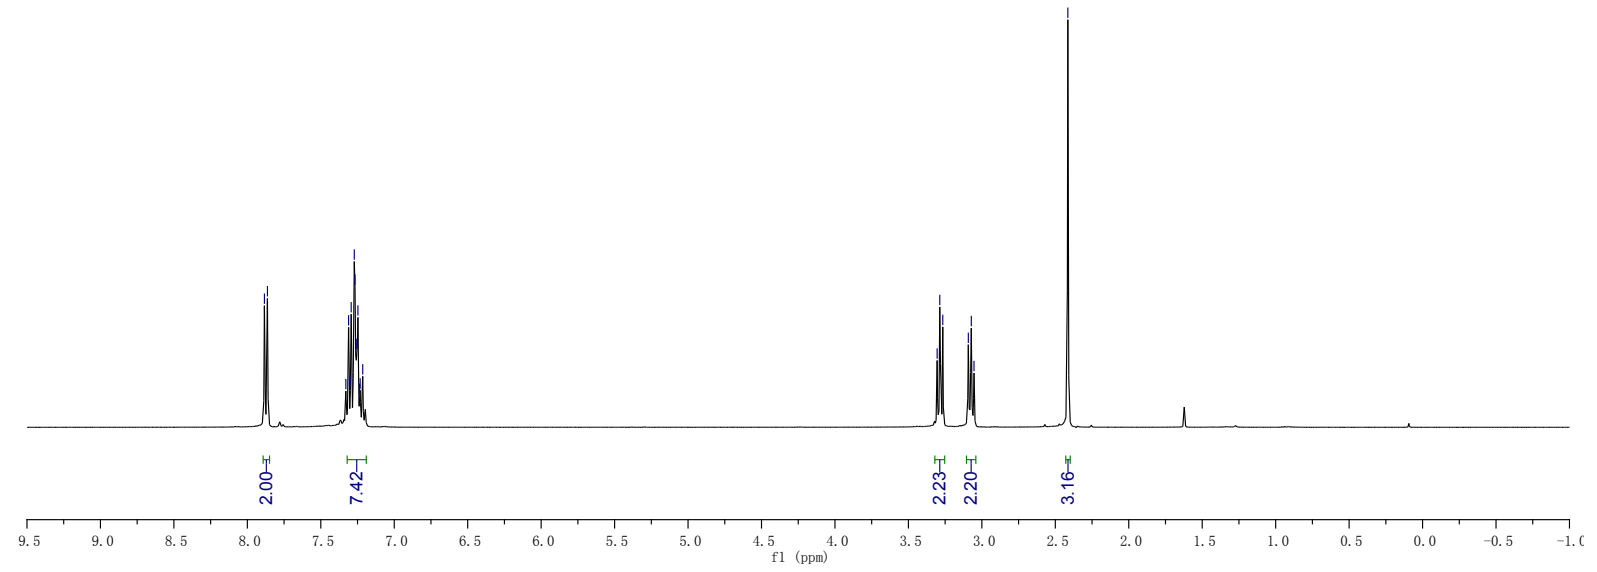

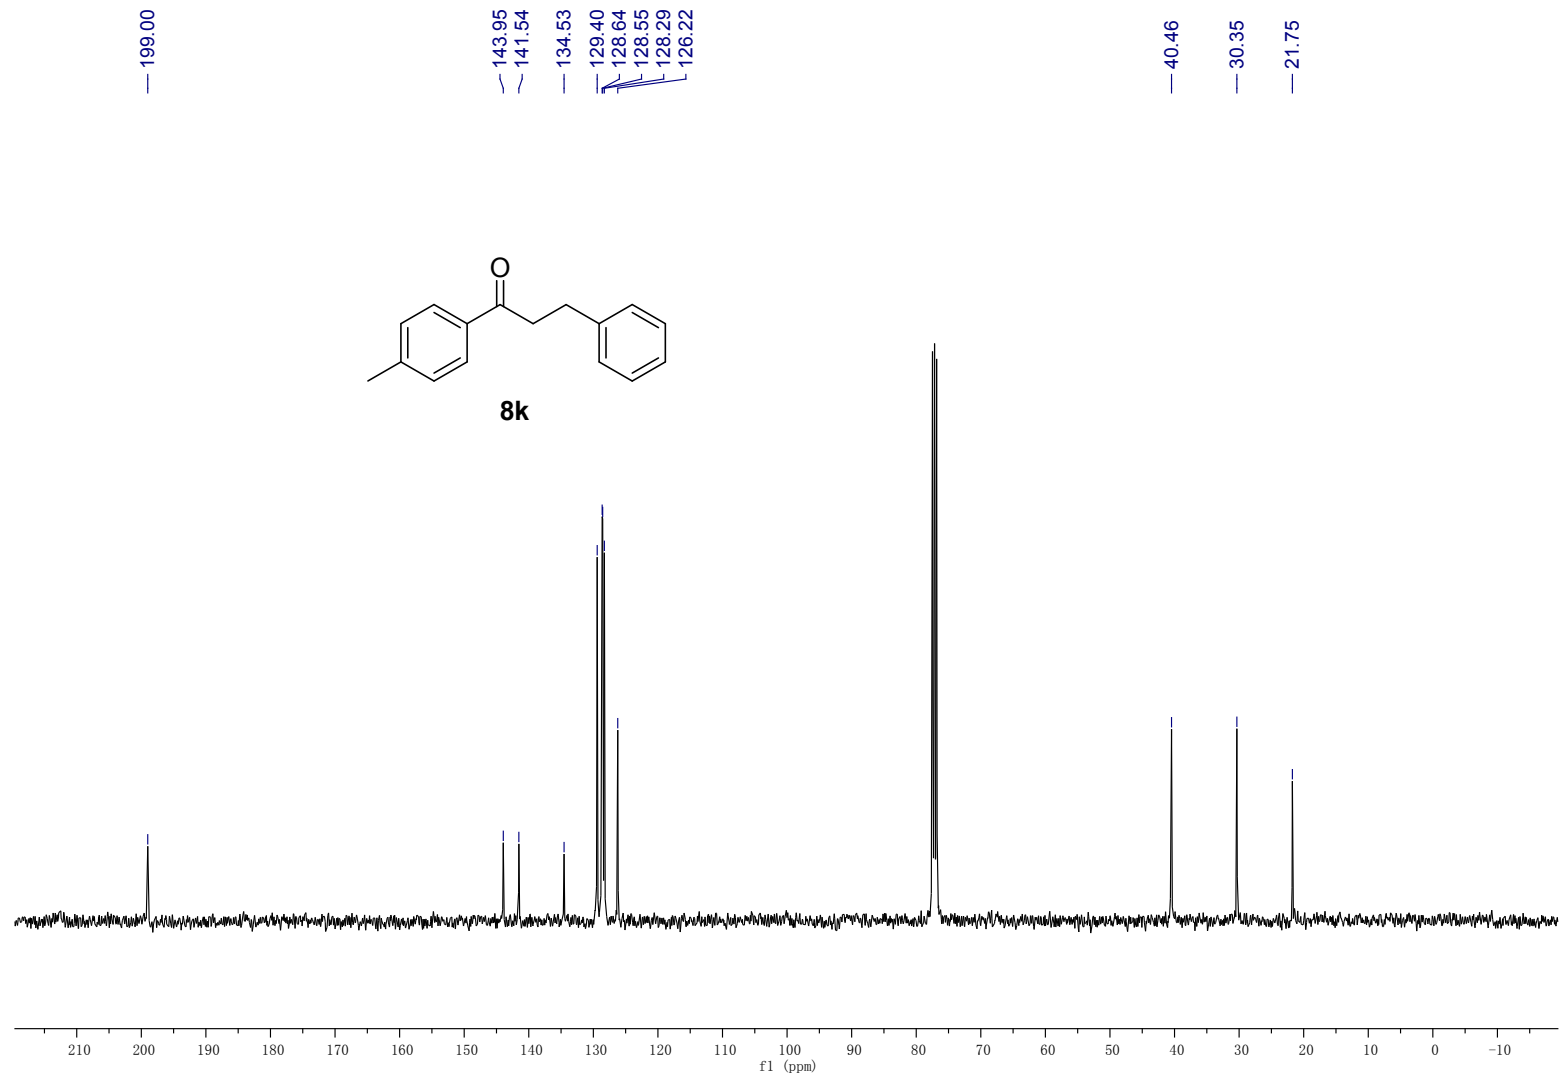



7.904  
7.883  
7.436  
7.415  
7.306  
7.288  
7.259  
7.256  
7.236  
7.214

3.292  
3.274  
3.254  
3.087  
3.048

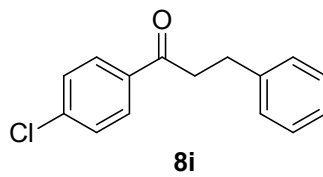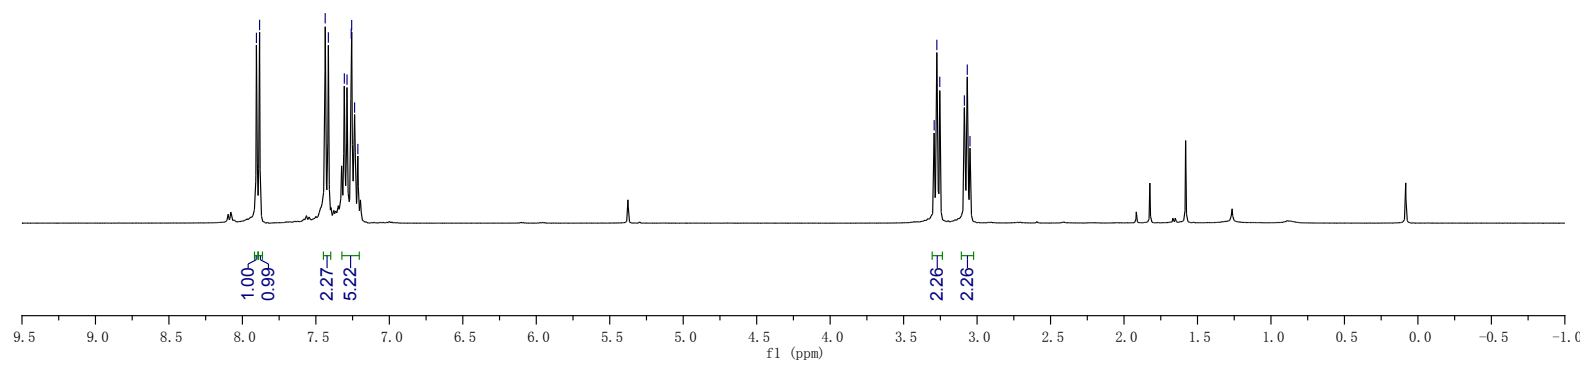

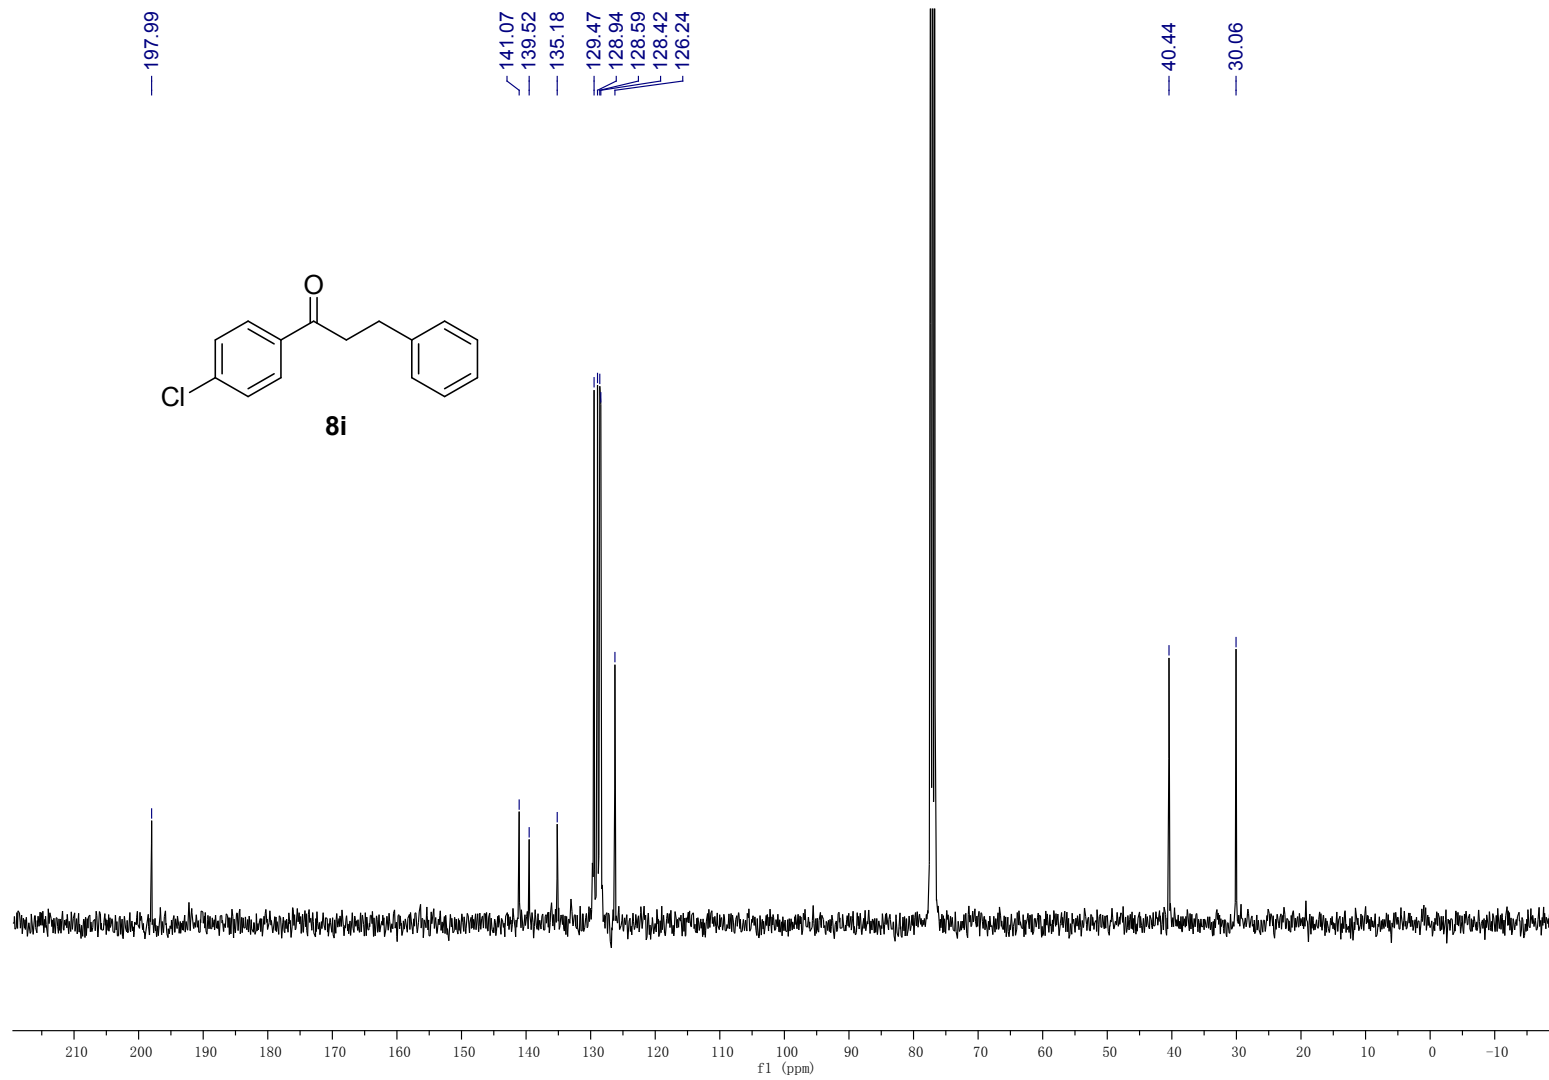

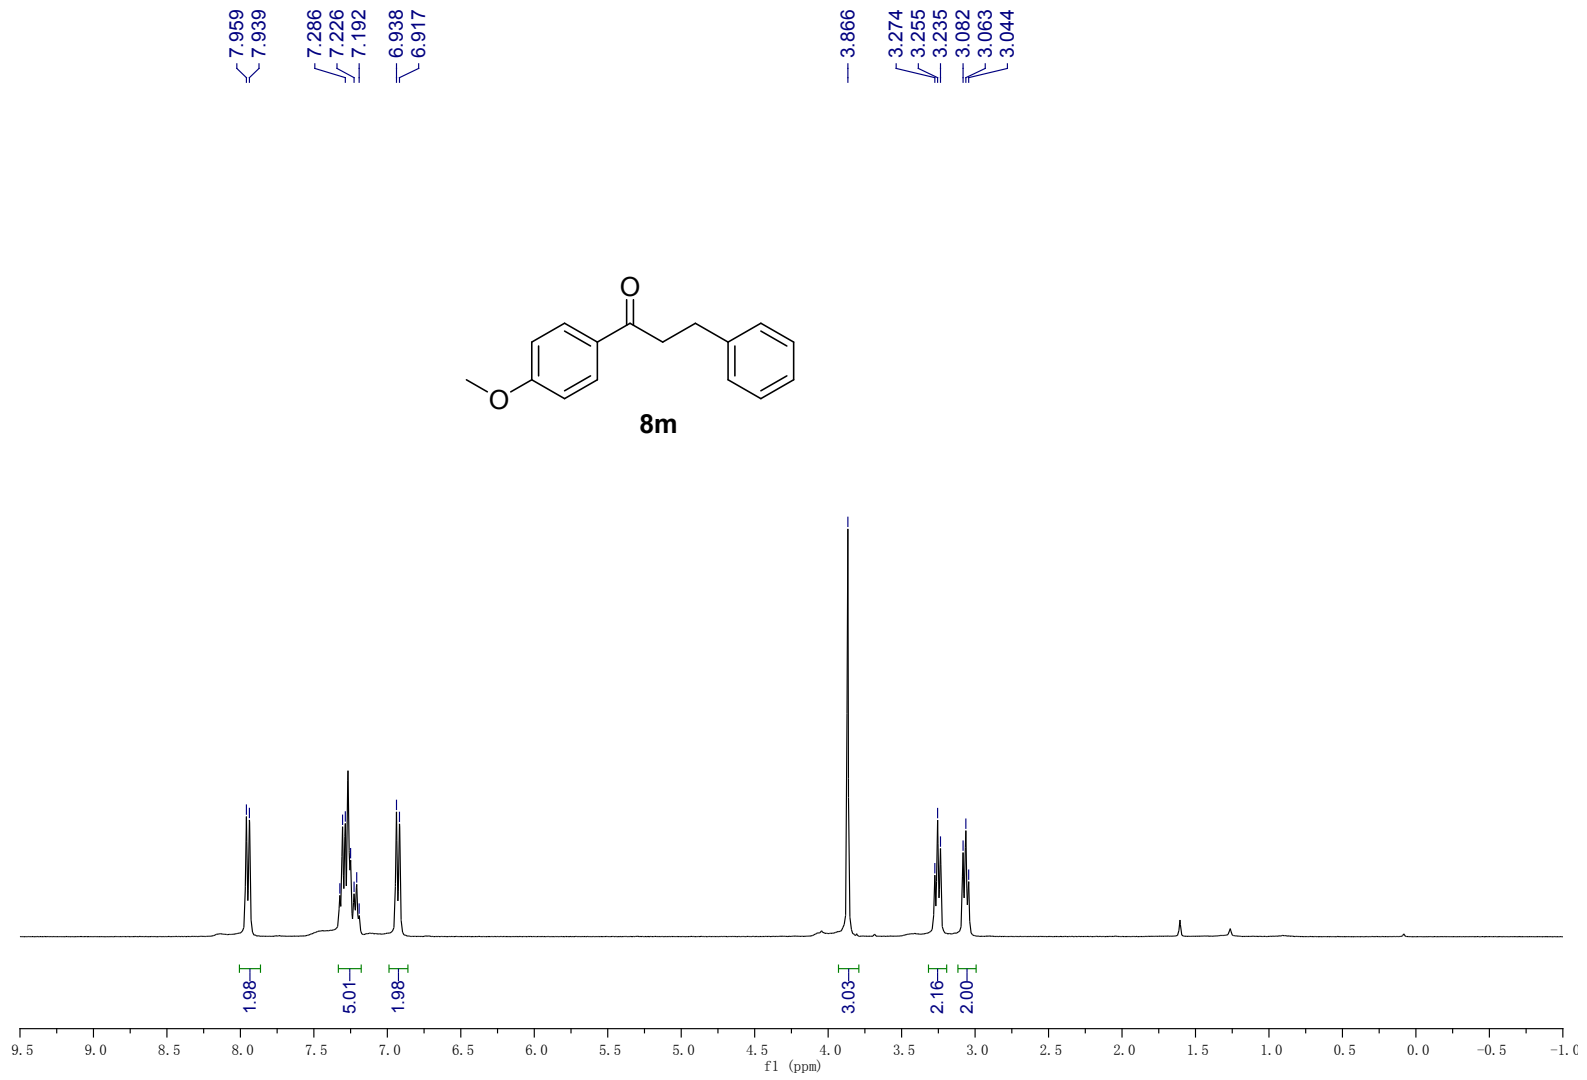

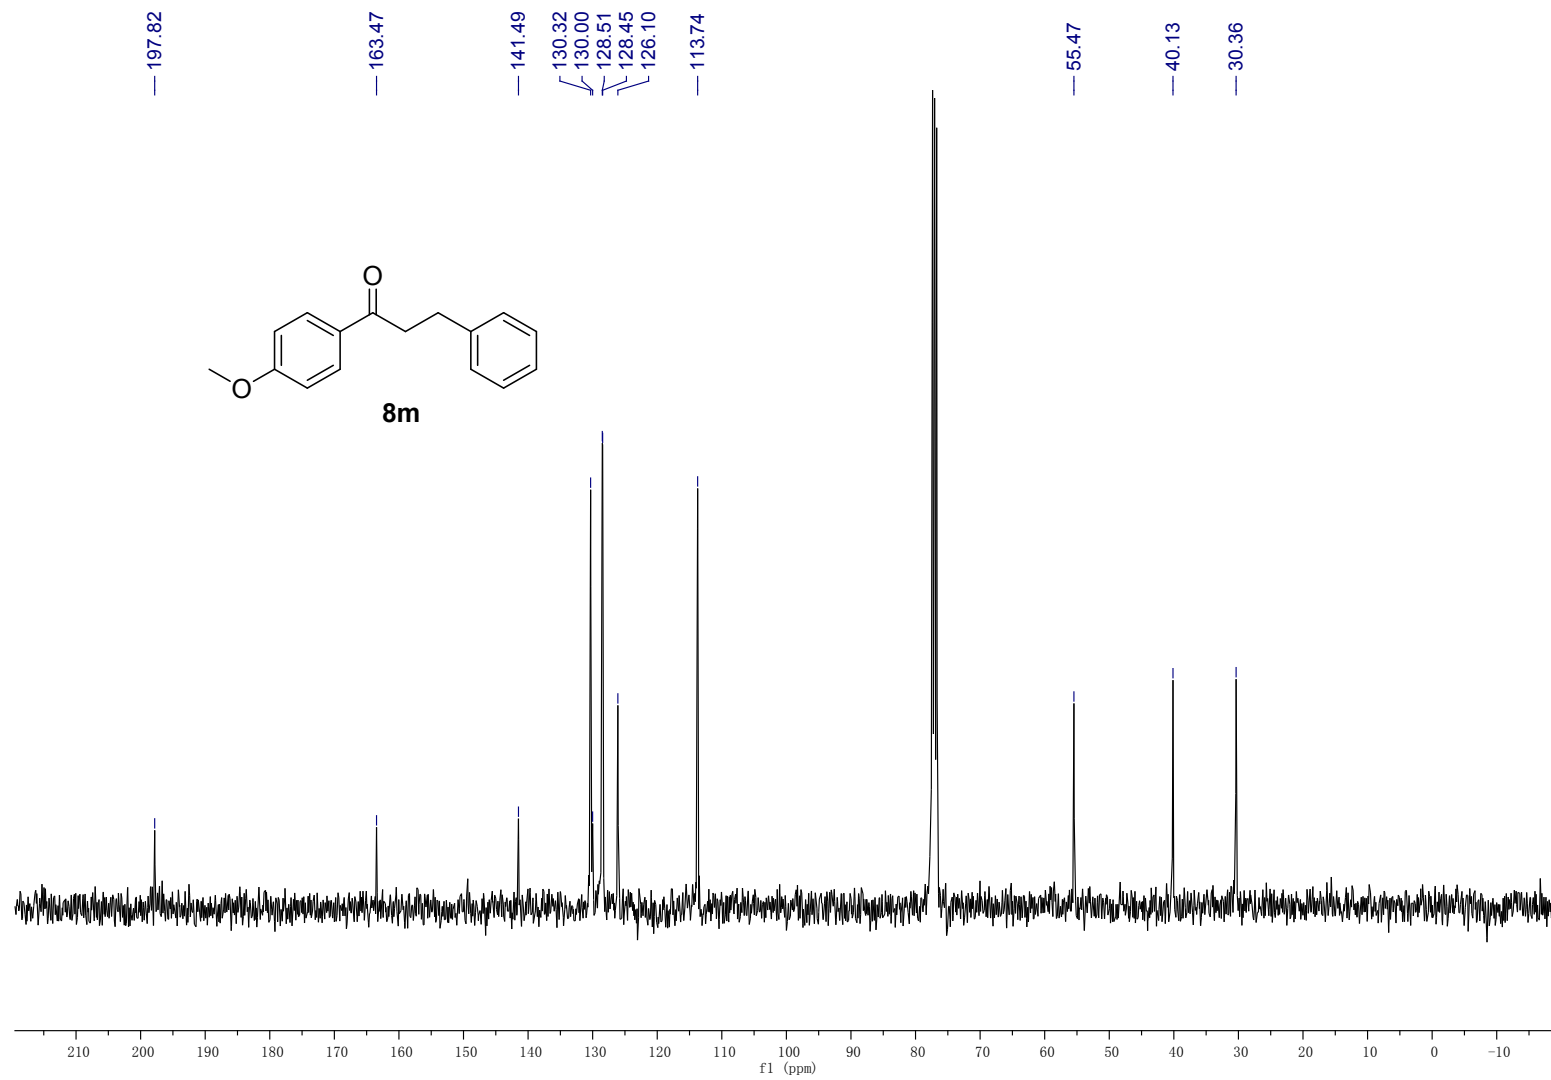

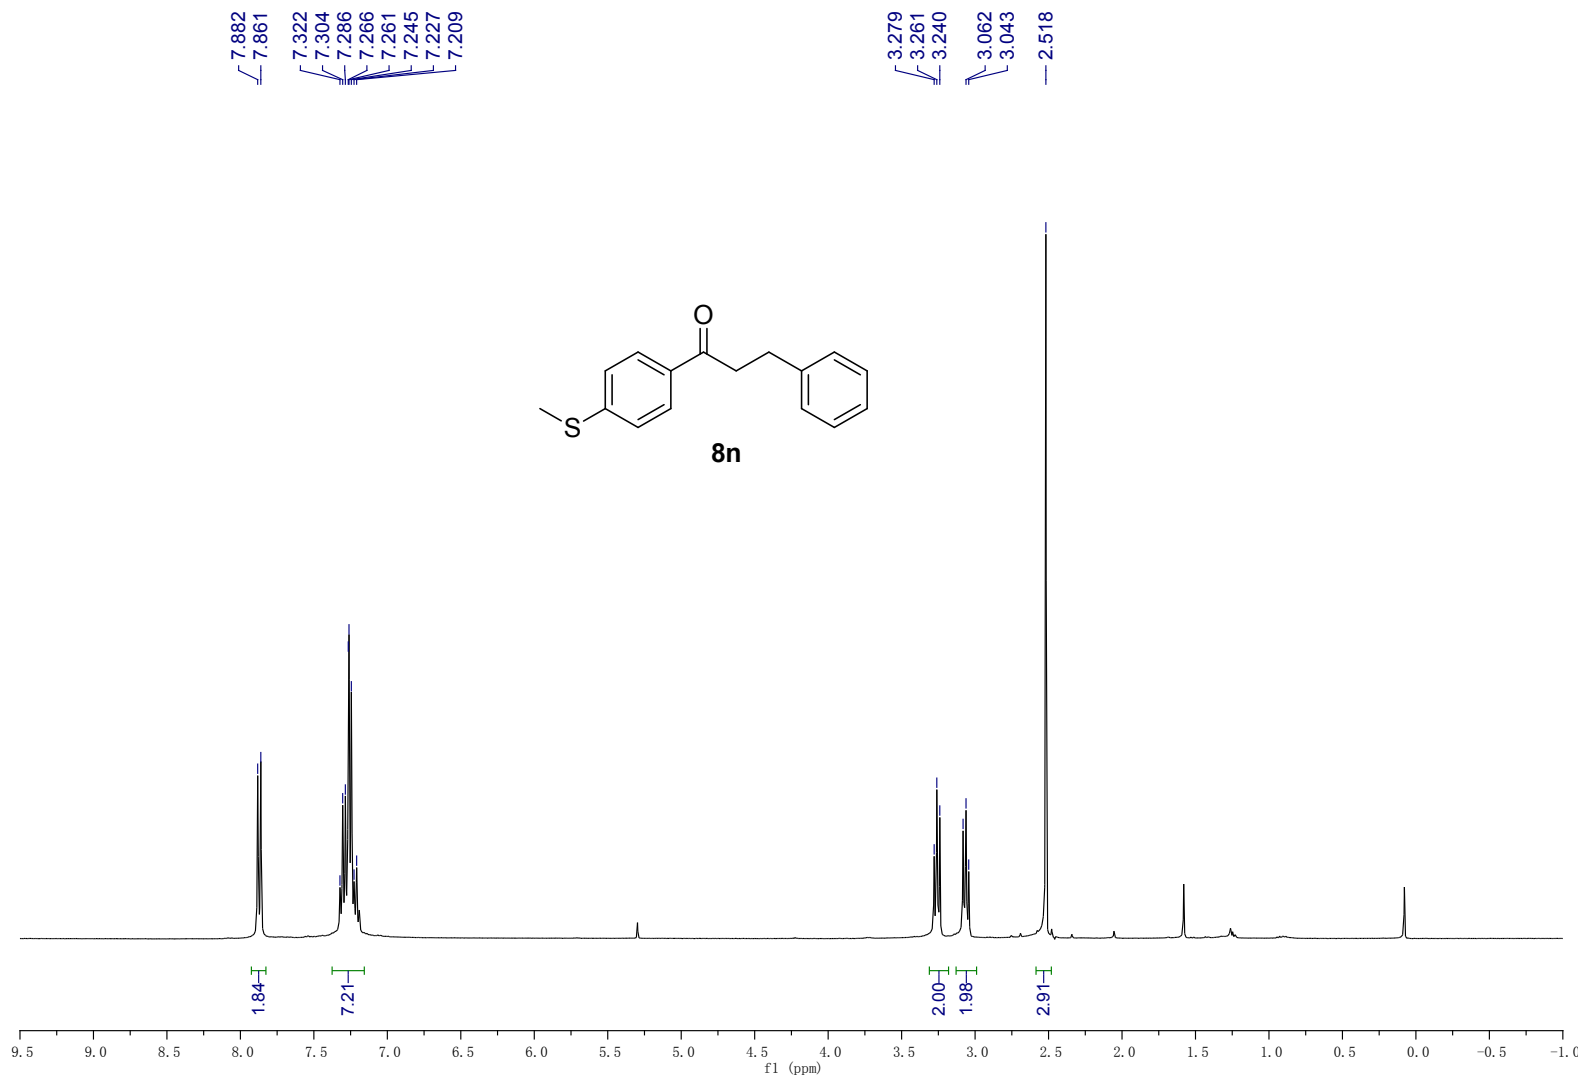

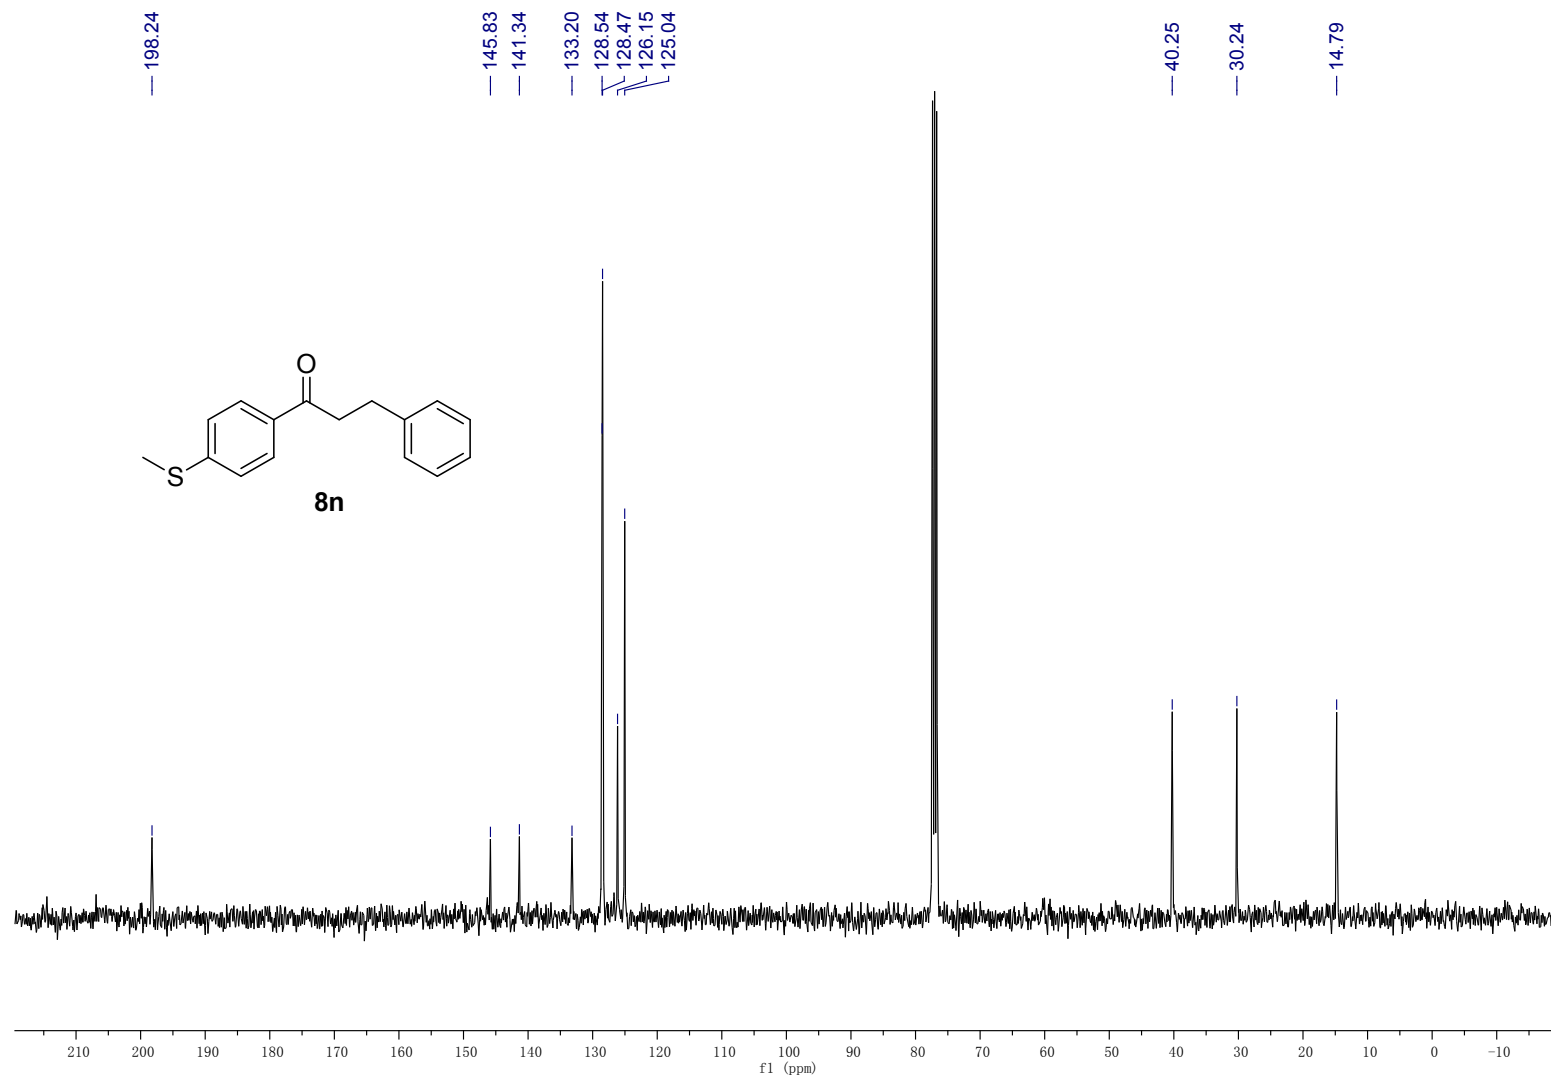

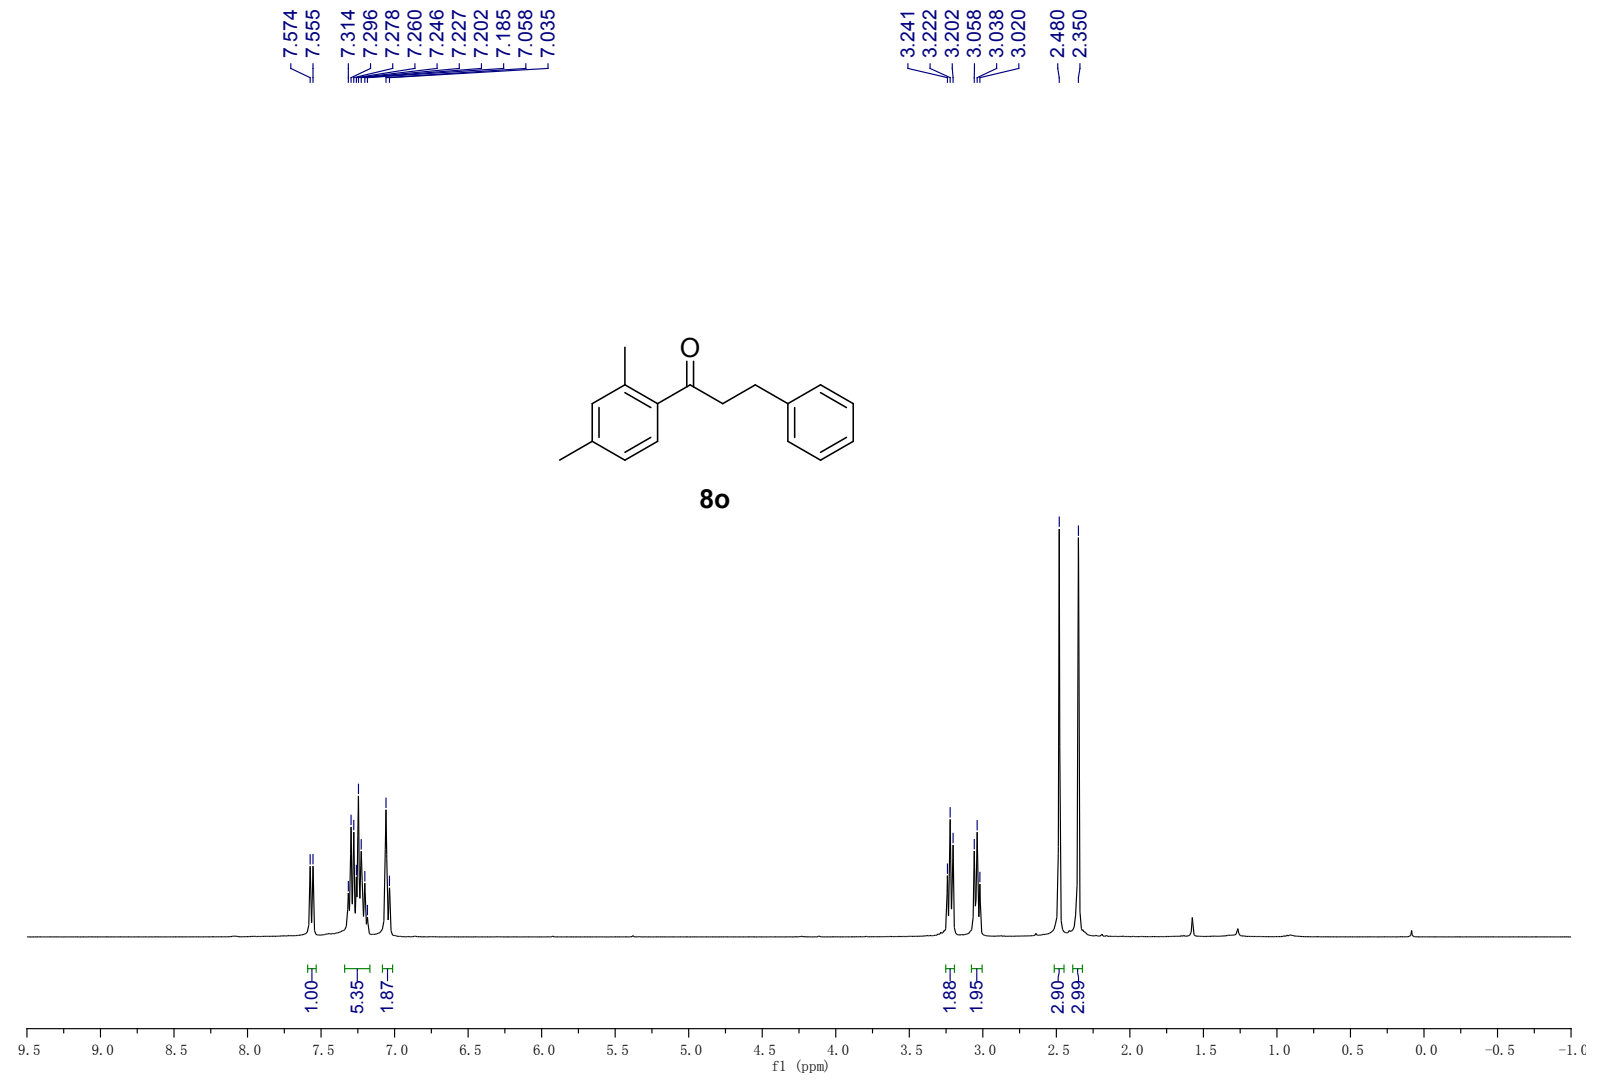

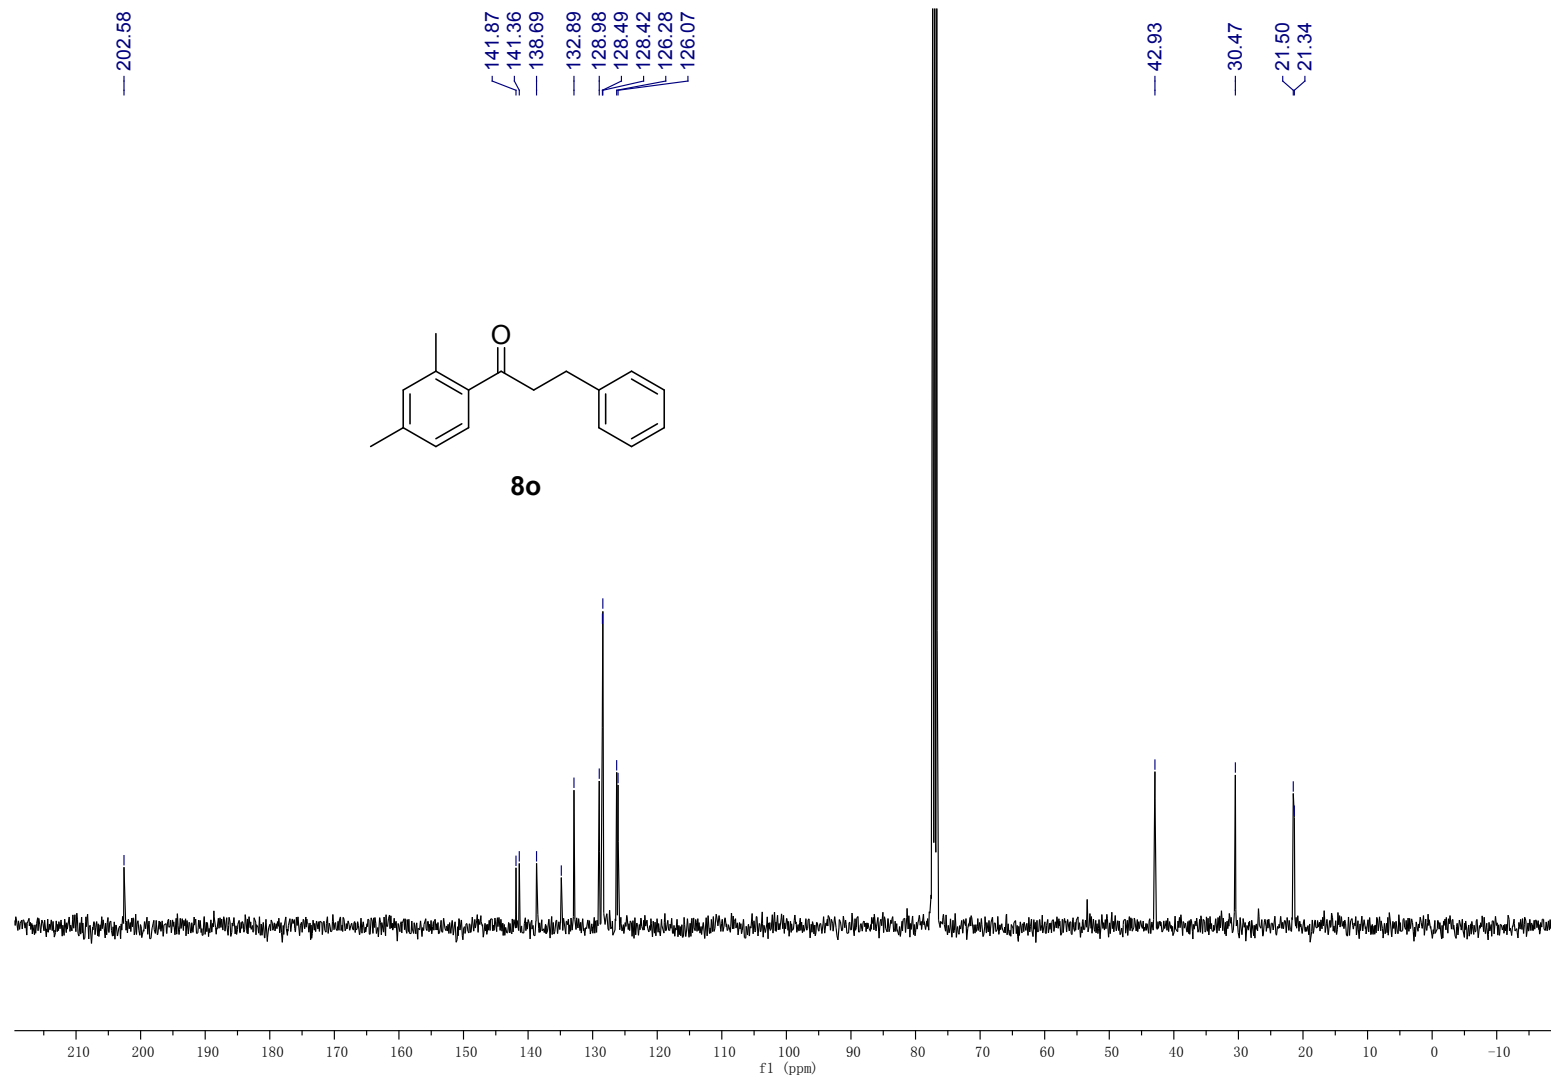



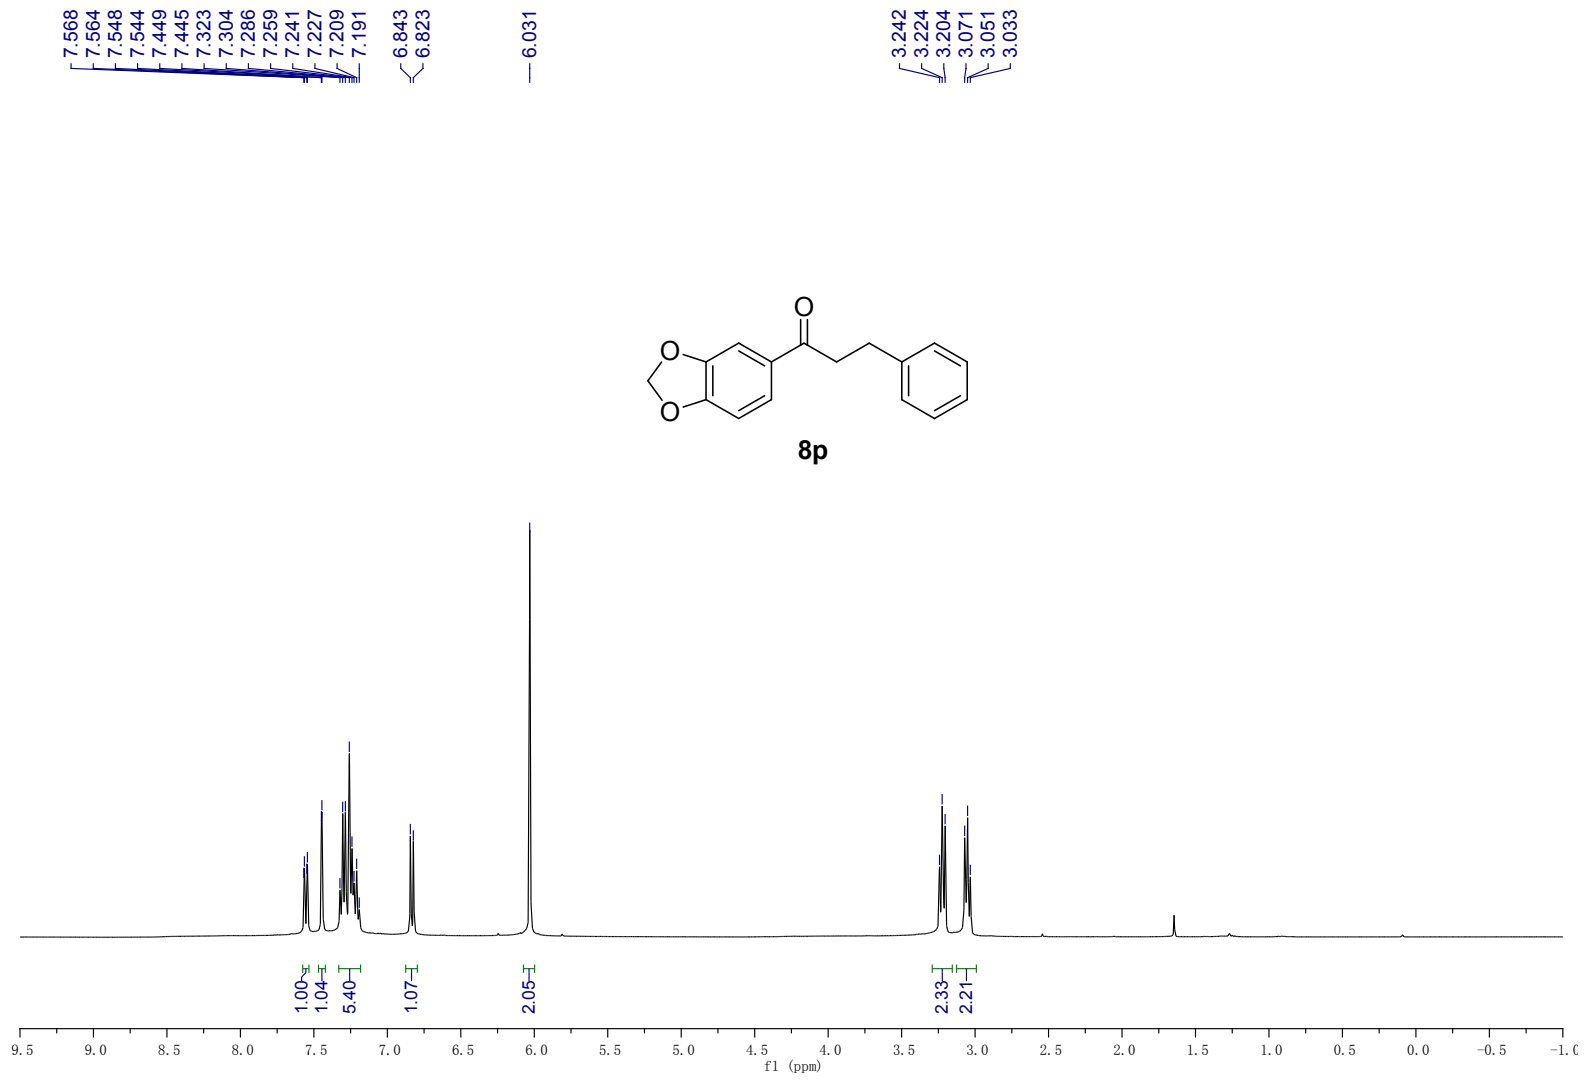

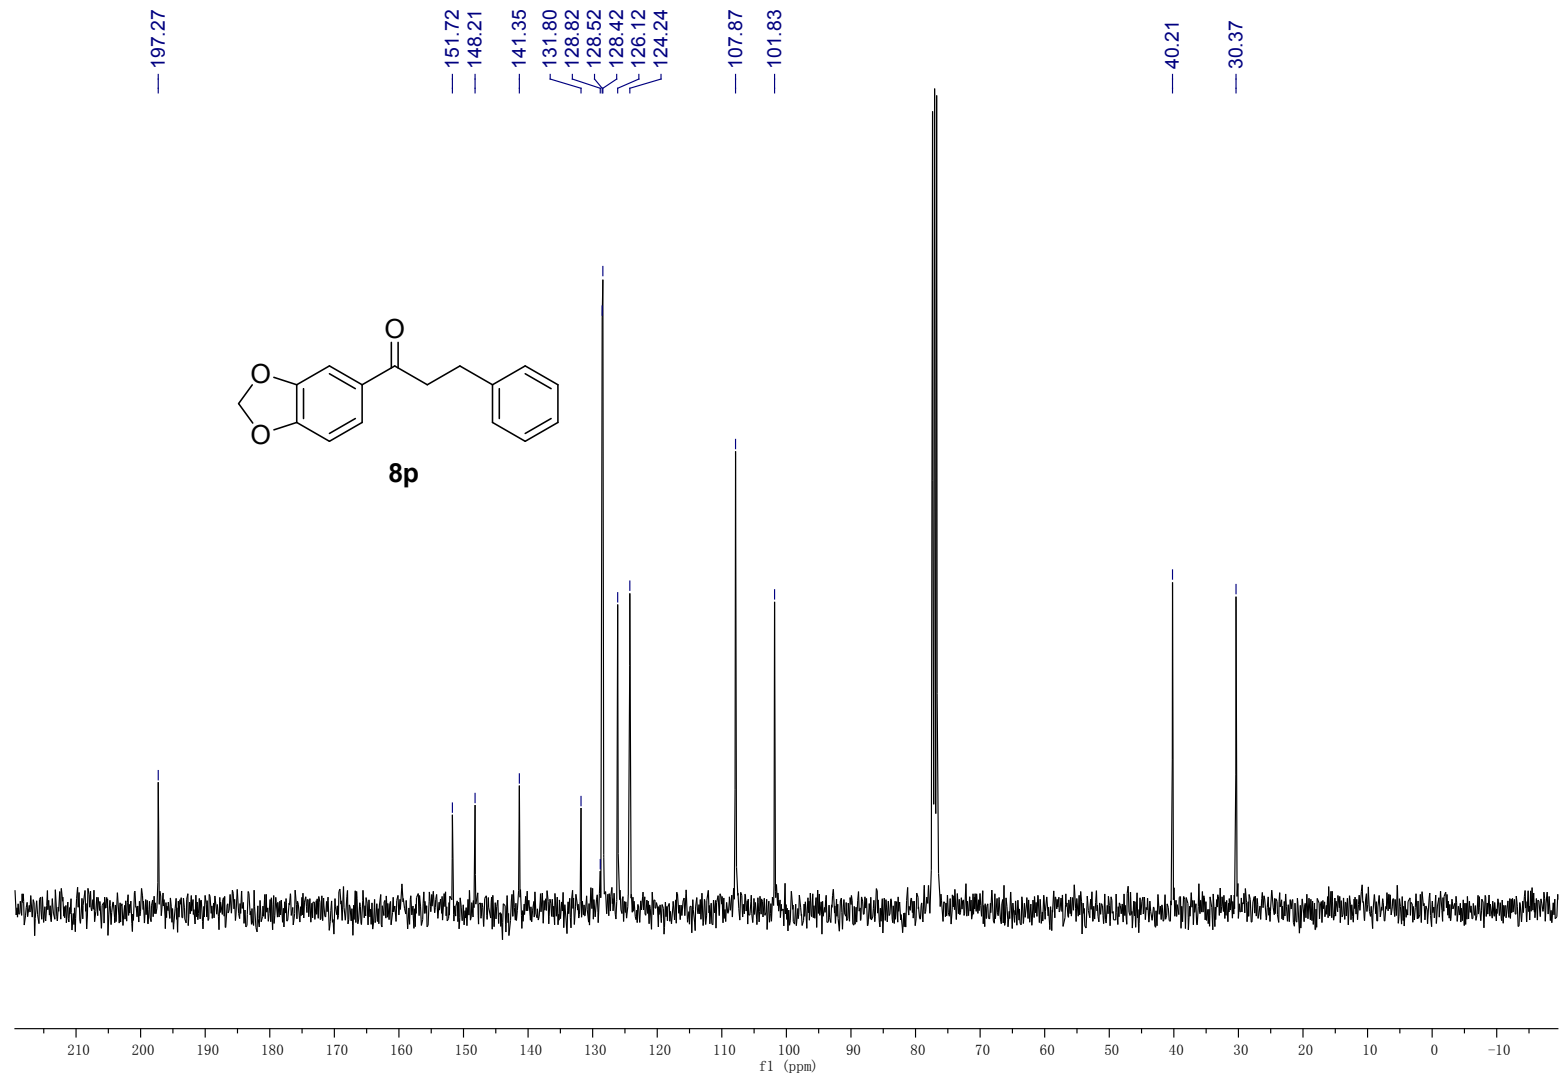

8.467  
7.952  
7.906  
7.867  
7.532  
7.347  
7.328  
7.311  
7.294  
7.228

3.468  
3.449  
3.429  
3.161  
3.141  
3.122

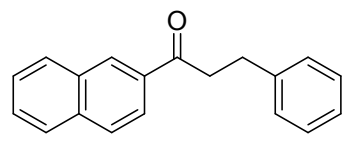

8q

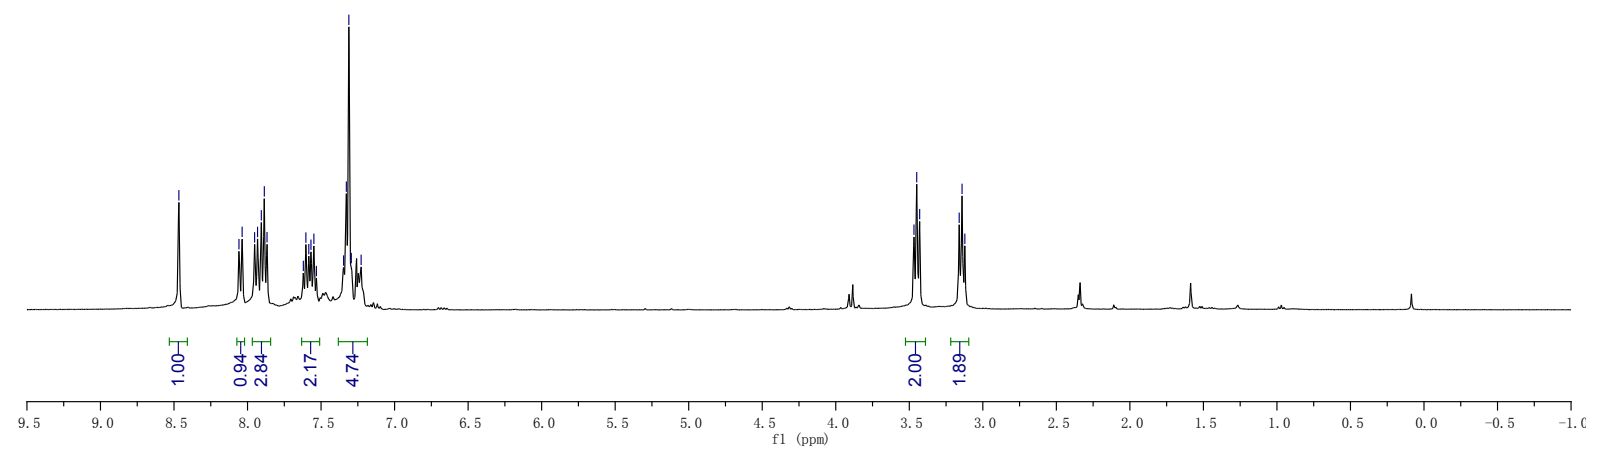

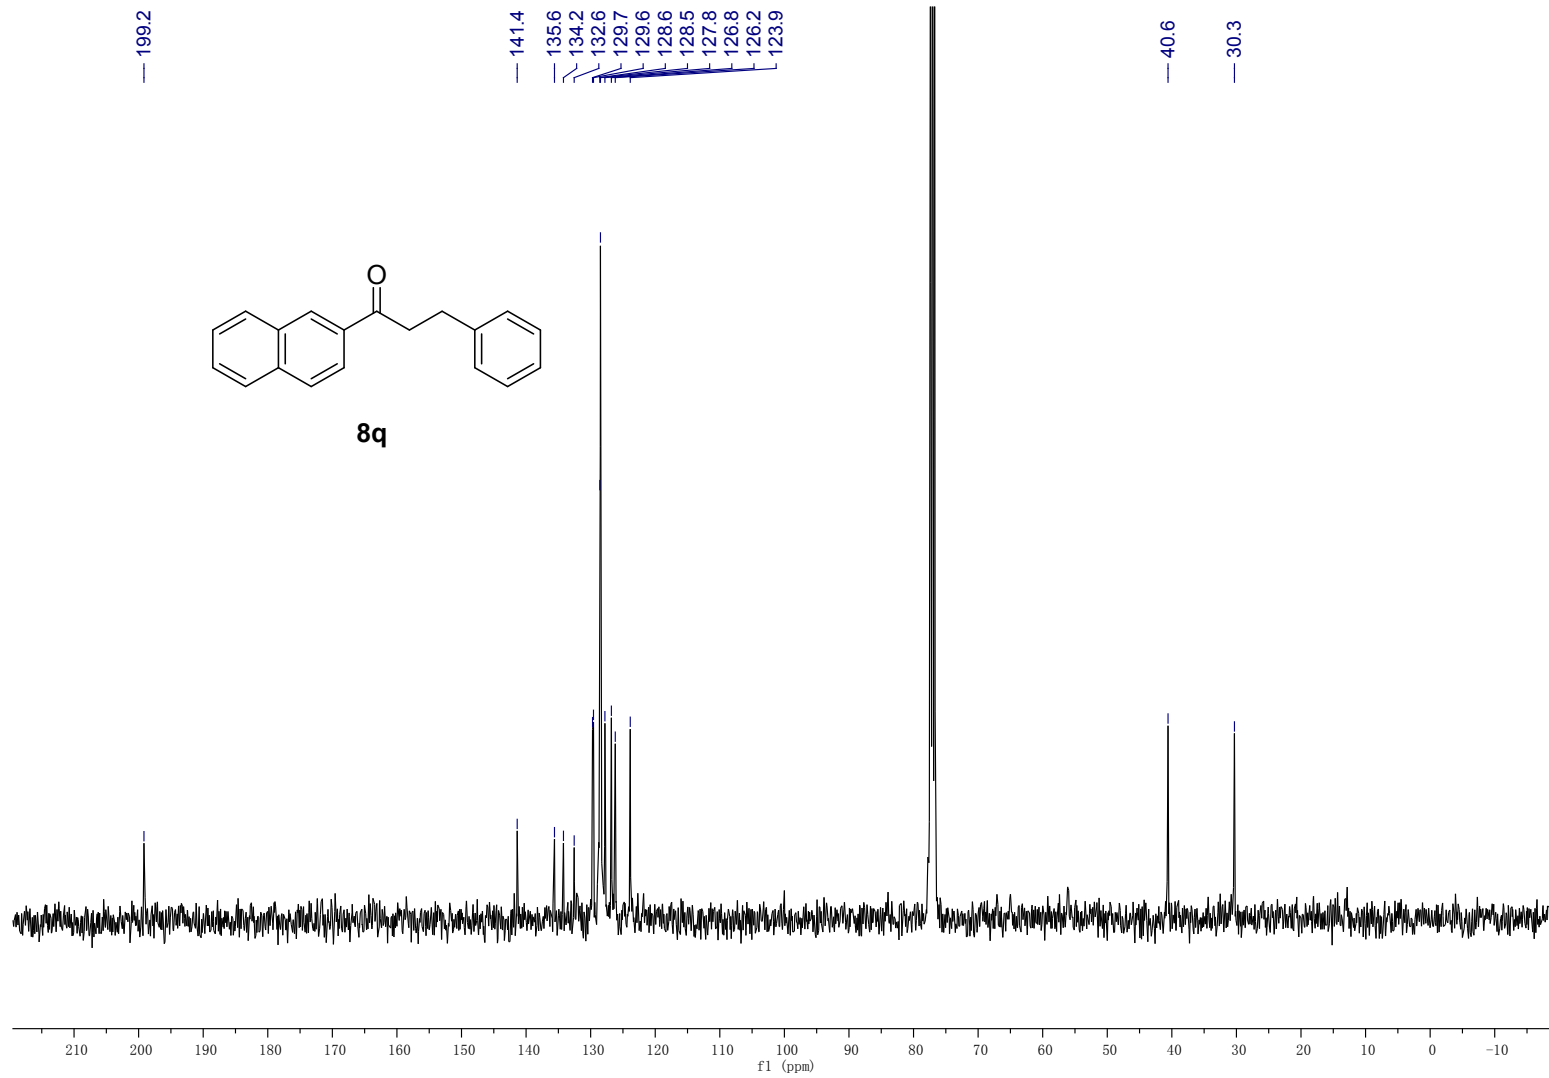

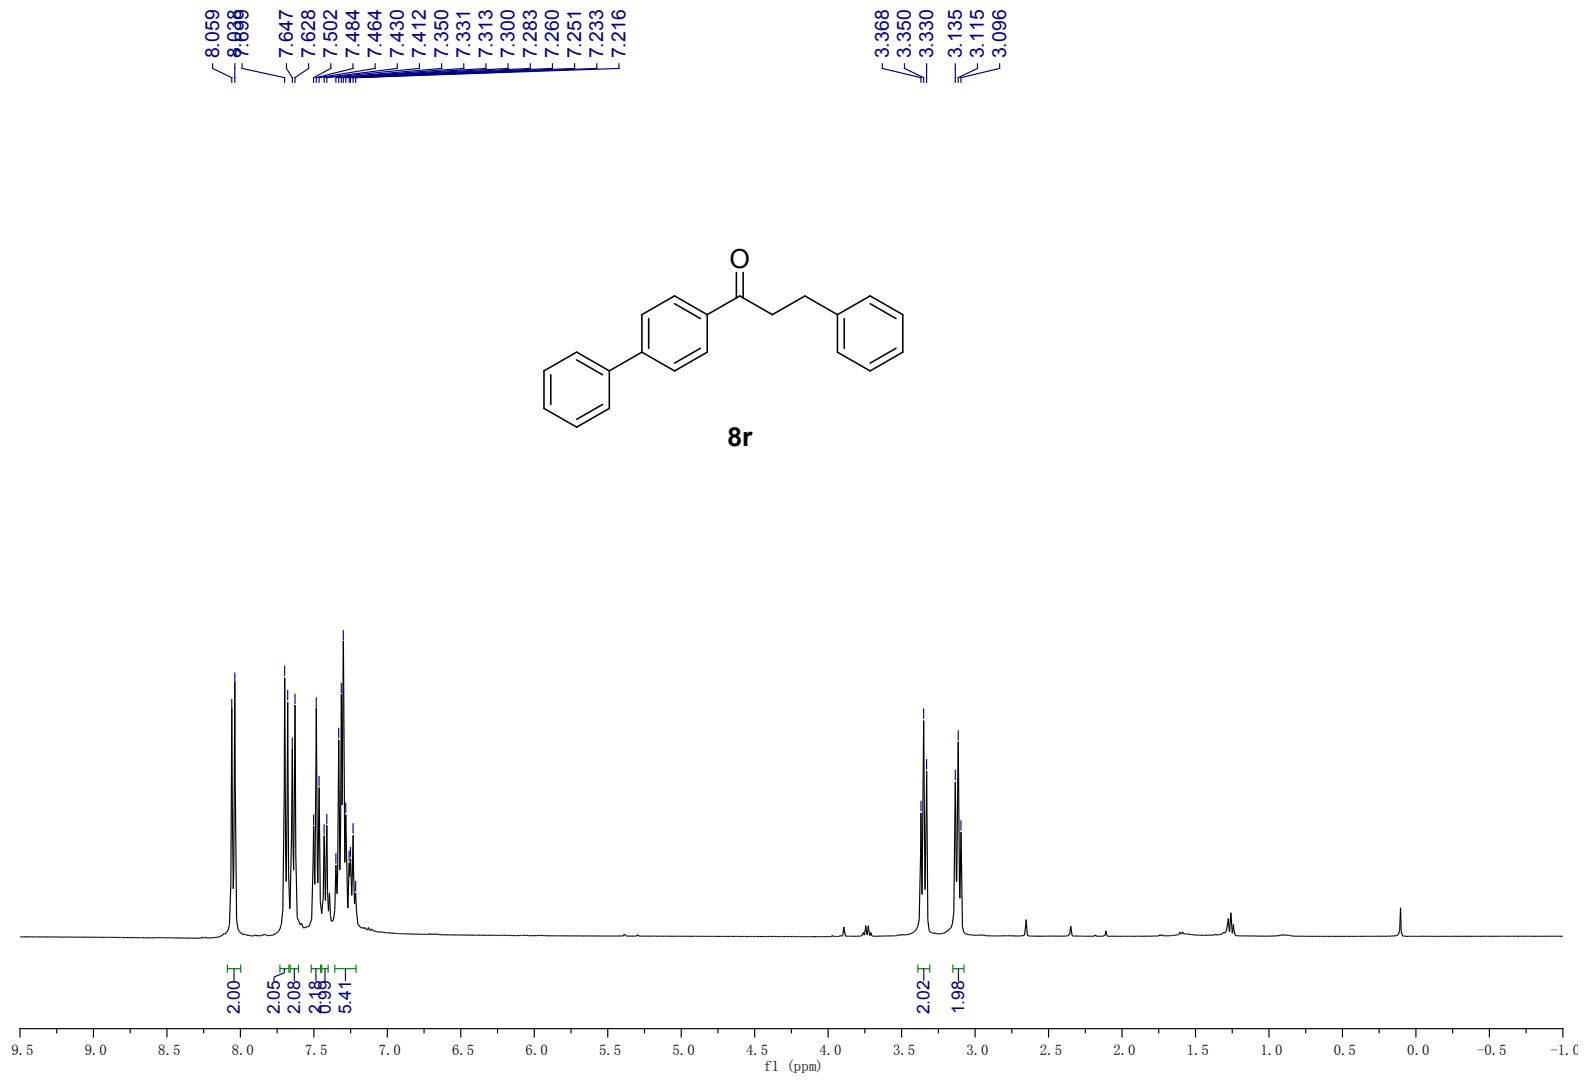

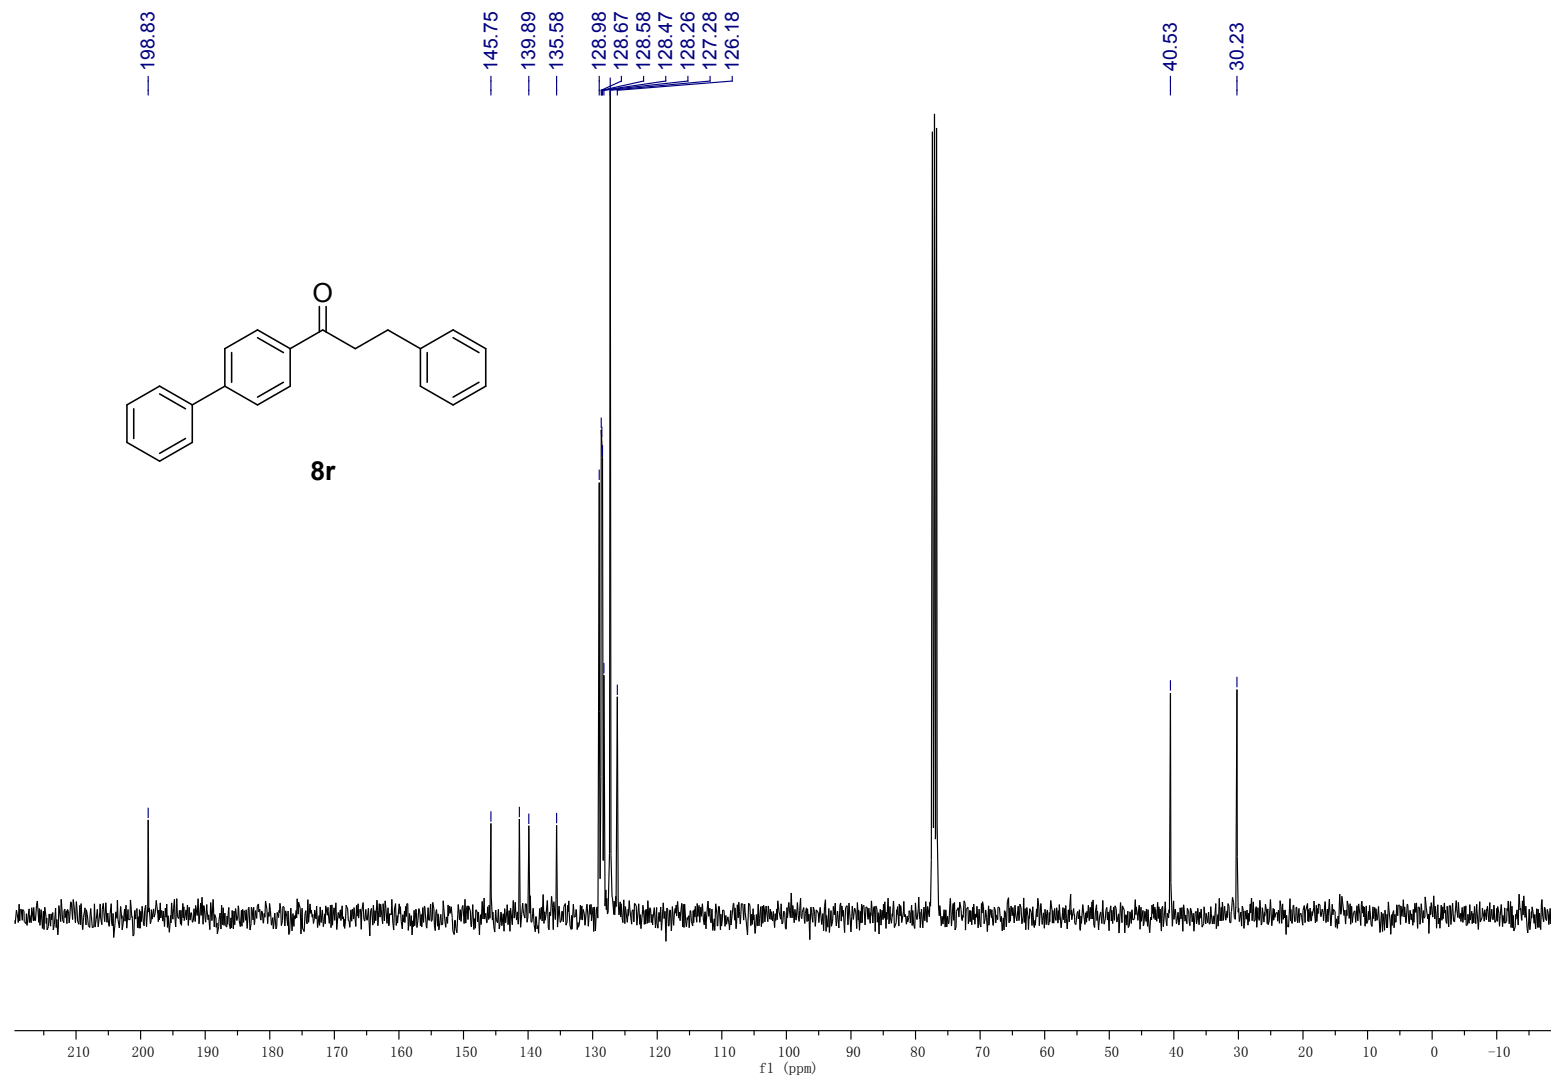

Supplement: c7ob00542c1.pdf [file c7ob00542c1.pdf]
